# Supplementary material for: Computational Design of Pore-Forming Peptides with Potent Antimicrobial and Anticancer Activities
Source: PubMed Central journal article supplement (PMC11345766; doi:10.1021/acs.jmedchem.4c00912), 2024-08-08
Supplement: jm4c00912_si_001.pdf [file jm4c00912_si_001.pdf]

Supplementary information for

# Computational design of pore-forming peptides with potent antimicrobial and anticancer activities

Rahul Deb<sup>1,2</sup>, Marcelo D. T. Torres<sup>3,4,5,6</sup>, Miroslav Boudný<sup>1,7</sup>, Markéta Koběřská<sup>8</sup>, Floriana Cappiello<sup>9</sup>, Miroslav Popper<sup>10</sup>, Kateřina Dvořáková Bendová<sup>10</sup>, Martina Drabinová<sup>1</sup>, Adelheid Hanáčková<sup>1</sup>, Katy Jeannot<sup>11,12\*</sup>, Miloš Petřík<sup>10,13\*</sup>, Maria Luisa Mangoni<sup>9\*</sup>, Gabriela Balíková Novotná<sup>8\*</sup>, Marek Mráz<sup>1,7\*</sup>, Cesar de la Fuente-Nunez<sup>3,4,5,6\*</sup>, and Robert Vácha<sup>1,2,14\*</sup>

<sup>1</sup>CEITEC – Central European Institute of Technology, Masaryk University, Brno 625 00, Czech Republic;

<sup>2</sup>National Centre for Biomolecular Research, Faculty of Science, Masaryk University, Brno 625 00, Czech Republic;

<sup>3</sup>Machine Biology Group, Departments of Psychiatry and Microbiology, Institute for Biomedical Informatics, Institute for Translational Medicine and Therapeutics, Perelman School of Medicine, University of Pennsylvania, Philadelphia, Pennsylvania 19104, USA;

<sup>4</sup>Departments of Bioengineering and Chemical and Biomolecular Engineering, School of Engineering and Applied Science, University of Pennsylvania, Philadelphia, Pennsylvania 19104, USA;

<sup>5</sup>Penn Institute for Computational Science, University of Pennsylvania, Philadelphia, Pennsylvania 19104, USA;

<sup>6</sup>Department of Chemistry, School of Arts and Sciences, University of Pennsylvania, Philadelphia, Pennsylvania 19104, USA;

<sup>7</sup>Department of Internal Medicine, Hematology and Oncology, University Hospital Brno and Faculty of Medicine, Masaryk University, Brno 625 00, Czech Republic;

<sup>8</sup>Institute of Microbiology, Czech Academy of Sciences, BIOCEV, Vestec 252 50, Czech Republic;

<sup>9</sup>Department of Biochemical Sciences, Laboratory Affiliated to Istituto Pasteur Italia-Fondazione Cenci Bolognetti, Sapienza University of Rome, Rome 00185, Italy;

<sup>10</sup>Institute of Molecular and Translational Medicine, Faculty of Medicine and Dentistry, Palacký University, Olomouc 779 00, Czech Republic;

<sup>11</sup>University of Franche-Comté, CNRS, Chrono-environment, Besançon 25030, France;

<sup>12</sup>National Reference Centre for Antibiotic Resistance, Besançon 25030, France;

<sup>13</sup>Czech Advanced Technology and Research Institute, Palacký University, Olomouc 779 00, Czech Republic;

<sup>14</sup>Department of Condensed Matter Physics, Faculty of Science, Masaryk University, Brno 611 37, Czech Republic.

\*Corresponding author emails -

Robert Vácha: robert.vacha@muni.cz

Cesar de la Fuente-Nunez: cfuente@upenn.edu

Marek Mráz: marek.mraz@email.cz

Gabriela Balíková Novotná: gnovotna@biomed.cas.cz

Maria Luisa Mangoni: marialuisa.mangoni@uniroma1.it

Miloš Petřík: milos.petrík@upol.cz

Katy Jeannot: katy.jeannot@univ-fcomte.fr

## Table of contents

Pages

### Supplementary Tables

|                                                                               |    |
|-------------------------------------------------------------------------------|----|
| Table S1. <i>In vitro</i> activity against 22 different human cell lines..... | S3 |
|-------------------------------------------------------------------------------|----|

### Supplementary Figures

|                                                                                                        |     |
|--------------------------------------------------------------------------------------------------------|-----|
| Figure S1. Water channels through the stabilized pores in ‘scaled’ Martini simulations.....            | S4  |
| Figure S2. Intramolecular salt bridge formation at the transmembrane peptide ends in pores....         | S5  |
| Figure S3. <i>In vitro</i> antimicrobial activity.....                                                 | S6  |
| Figure S4. <i>In vitro</i> toxicity against human red blood cells.....                                 | S8  |
| Figure S5. <i>In vitro</i> stability in human serum .....                                              | S9  |
| Figure S6. <i>In vivo</i> antimicrobial and wound-healing activity in mice.....                        | S10 |
| Figure S7. <i>In vitro</i> dye leakage activity.....                                                   | S16 |
| Figure S8. <i>In vitro</i> anticancer activity.....                                                    | S17 |
| Figure S9. Effect of media on anticancer activity.....                                                 | S18 |
| Figure S10. Effect of pH and media on anticancer activity.....                                         | S19 |
| Figure S11. Flow cytometric analysis of whole blood.....                                               | S20 |
| Figure S12. Correlations between pore stability, <i>in vitro</i> activity, and peptide net charge..... | S21 |
| Figure S13. Comparison of antimicrobial activity against Gram-positive and Gram-negative bacteria..... | S22 |

### Supplementary Materials

|                                                           |           |
|-----------------------------------------------------------|-----------|
| HPLC and MS certificates of the synthesized peptides..... | S23 – S70 |
|-----------------------------------------------------------|-----------|

## Supplementary Tables

**Table S1. *In vitro* activity against 22 different human cancer cell lines.**

| Sr. no. | Cell line  | Cancer type   | Culture medium                              | Activity (in M) |           |            |
|---------|------------|---------------|---------------------------------------------|-----------------|-----------|------------|
|         |            |               |                                             | LP1             | LP40      | Bortezomib |
| 1       | A498       | Kidney        | DMEM + 10% FCS                              | 3.6E-06         | 2.0E-05   | 9.1E-09    |
| 2       | A549       | Lung          | DMEM + 10% FCS                              | 8.4E-06         | 9.7E-05   | 2.5E-08    |
| 3       | Caki-1     | Kidney        | DMEM + 10% FCS                              | 6.6E-06         | 2.3E-05   | 1.2E-08    |
| 4       | DU-145     | Prostate      | DMEM + 10% FCS                              | 5.9E-06         | 6.0E-05   | 1.6E-08    |
| 5       | H460       | Lung          | DMEM + 10% FCS                              | 3.7E-06         | > 2.0E-04 | 2.6E-08    |
| 6       | HCT116     | Colorectal    | DMEM + 10% FCS                              | 7.1E-06         | 7.9E-05   | 6.9E-09    |
| 7       | HCT-15     | Colorectal    | RPMI-1640 +10% FCS                          | 4.7E-06         | 7.1E-06   | 9.8E-09    |
| 8       | HL-60      | Leukemia      | RPMI-1640 + 10% FCS                         | 6.5E-06         | 7.2E-06   | 4.1E-09    |
| 9       | K562       | Leukemia      | RPMI-1640 + 10% FCS                         | 6.4E-06         | 6.4E-06   | 9.1E-09    |
| 10      | MCF-7      | Breast        | DMEM + 10% FCS                              | 8.3E-06         | 7.0E-05   | 2.1E-08    |
| 11      | MDA MB 231 | Breast        | DMEM + 10% FCS                              | 6.7E-06         | 6.1E-05   | 1.2E-08    |
| 12      | MDA MB 435 | Melanoma      | RPMI-1640 +10% FCS                          | 1.4E-06         | 1.9E-04   | 4.3E-09    |
| 13      | MOLT-4     | Leukemia      | DMEM + 10% FCS                              | 1.6E-05         | > 2.0E-04 | 4.0E-09    |
| 14      | MSC_UC     | Non-cancerous | Promocell MSC-Medium C-28010 + Sup. C39810  | 2.0E-06         | 1.4E-04   | 4.7E-09    |
| 15      | NHDF       | Non-cancerous | Promocell NHDF-Medium C-23010 + Sup. C39315 | 7.2E-06         | > 2.0E-04 | 1.4E-08    |
| 16      | OVCAR-3    | Ovarian       | RPMI-1640 +10% FCS                          | 4.9E-06         | 9.0E-06   | 4.0E-09    |
| 17      | PC3        | Prostate      | DMEM + 10% FCS                              | 1.6E-05         | 9.1E-05   | 1.6E-08    |
| 18      | RPMI 8226  | Myeloma       | RPMI-1640 +10% FCS                          | 4.4E-06         | 5.6E-06   | 3.2E-09    |
| 19      | SK-OV3     | Ovarian       | DMEM + 10% FCS                              | 1.3E-05         | 1.1E-04   | 1.9E-08    |
| 20      | SW620      | Colorectal    | DMEM + 10% FCS                              | 2.9E-05         | 1.4E-04   | 1.0E-08    |
| 21      | T-47D      | Breast        | RPMI-1640 +10% FCS + 0.2U/mL Insulin        | 3.2E-06         | 4.6E-06   | 8.6E-09    |
| 22      | U251MG     | Brain         | DMEM + 10% FCS                              | 2.0E-05         | > 2.0E-04 | 1.9E-08    |

The effect of investigated compounds on the proliferation of 22 different human cell lines is reported as the half maximal inhibitory concentration, i.e., IC<sub>50</sub> value, after 72 hours of incubation. Twenty of these 22 cell lines represent specific cancer types and 2 were non-cancerous. Peptide sequences are provided in Table 1 in the main text. Anticancer drug bortezomib was used as the reference.

## Supplementary Figures

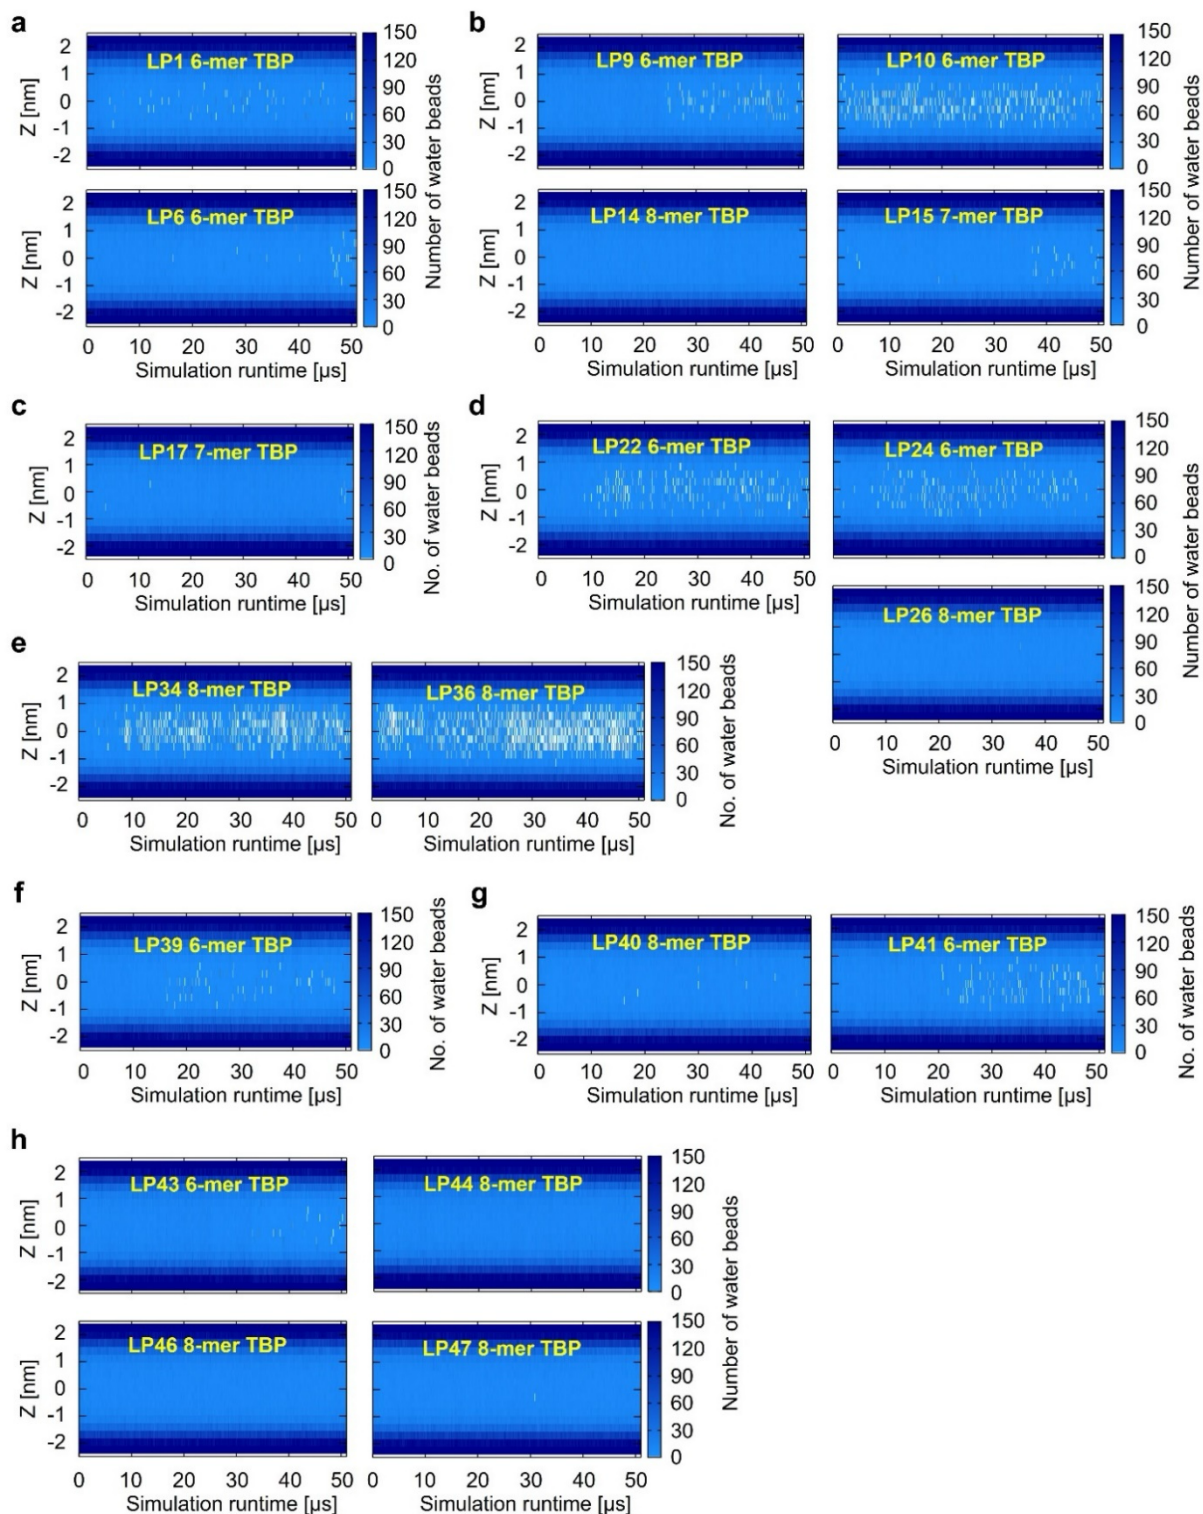

**Figure S1. Water channels through the stabilized pores in ‘scaled’ Martini simulations.**

Water density profiles were calculated as the average number of CG water beads passing through the transmembrane barrel pores (TBPs) stabilized by the peptides over 51  $\mu\text{s}$  long MD simulations using ‘scaled’ Martini force field (see Table 1 in the main text).

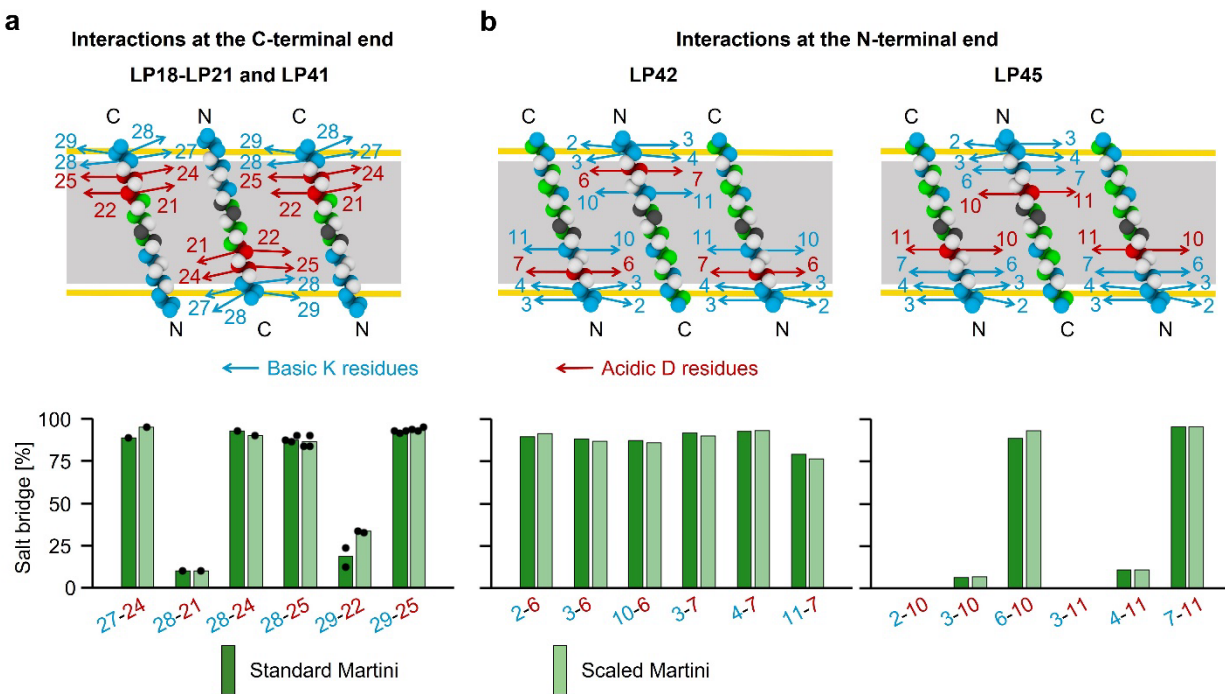

**Figure S2. Intramolecular salt bridge formation at the transmembrane peptide ends in pores.**

Schematic illustrations of the formation of intramolecular salt bridges at the peptide ends and the strength of such interactions in the transmembrane barrel pores. Illustrations depict three antiparallel neighboring transmembrane peptides showing two representative peptide-peptide interfaces from an octameric transmembrane barrel pore (in the side view). The stability of these interactions was calculated as the percentage of designed interaction contacts averaged over 51  $\mu$ s simulation run using the standard and ‘scaled’ Martini force fields. Color coding: peptide hydrophilic and hydrophobic residues in green and white, respectively; basic and acidic in residues blue and red, respectively; aromatic residues in grey; yellow horizontal lines demarcate the position of lipid phosphates; and grey panel represents the lipid tails. Peptide sequences are provided in Table 1 in the main text.

a

| Species              | Strain        | Antibiotic resistance / strain details | LP1  | LP18 | LP28 | AMC  | POL | LEV | Prot. |
|----------------------|---------------|----------------------------------------|------|------|------|------|-----|-----|-------|
| <i>E. faecalis</i>   | JH2-2         | WT                                     | >32  | >32  | >32  | 0.7  | >25 | 1.4 | b     |
| <i>E. faecalis</i>   | UCN41         | VAN                                    | >32  | >32  | >32  | 1.4  | >25 | 1.4 | b     |
| <i>E. faecalis</i>   | ATCC 700802   | VAN                                    | >60  | >60  | >60  |      | >60 | 0.8 | d     |
| <i>E. faecium</i>    | ATCC 19434T   | WT                                     | >32  | 15   | 28   | 1.4  | >25 | 6   | b     |
| <i>E. faecium</i>    | BM4147        | AMX, VAN                               | 16   | 4    | 7    | >23  | >25 |     | b     |
| <i>E. faecium</i>    | Z906          | VAN, TEI, LNZ                          | >32  | 16   | 4    | >360 |     |     | c     |
| <i>E. faecium</i>    | ATCC 700221   | VAN, TEI                               | 12.5 | >60  | 0.8  |      | >60 | 50  | d     |
| <i>S. aureus</i>     | ATCC 25923    | WT                                     | >8   | >8   | >8   | 1.4  | >25 | 3   | b     |
| <i>S. aureus</i>     | NRS1          | MRSA or VISA                           | >16  | >16  | >16  | 46   |     |     | a     |
| <i>S. aureus</i>     | ATCC 29213    | Clinical                               | >32  | >32  | >32  | 46   |     |     | c     |
| <i>S. aureus</i>     | ATCC 12600    | MSSA                                   | 50   | 50   | 25   |      | 50  | 1.6 | d     |
| <i>S. aureus</i>     | ATCC BAA-1556 | MET                                    | >60  | >60  | 12.5 |      | >60 | 3.1 | d     |
| <i>K. pneumoniae</i> | ATCC 700603   | ESBL                                   | 4    | 4    | 7    | >180 |     |     | a     |
| <i>K. pneumoniae</i> | E1120         | GEN                                    | 8    | 8    | 2    | >360 |     |     | c     |
| <i>K. pneumoniae</i> | 4371          | GEN, AMI, IMI, MER                     | 16   | 8    | 8    | >360 |     |     | c     |
| <i>K. pneumoniae</i> | E1267         | GEN, AMI                               | >32  | >32  | >32  | >360 |     |     | c     |
| <i>K. pneumoniae</i> | ATCC 13883    |                                        | 0.2  | 0.8  | 0.8  |      | 0.1 | 0.4 | d     |
| <i>A. baumannii</i>  | CIP 7010      | WT                                     | 2    | 0.5  | 2    | >92  | 1.5 | 0.3 | b     |
| <i>A. baumannii</i>  | GSAB 164      | COL, MER                               | 1    | 1    | 2    | >183 |     |     | a     |
| <i>A. baumannii</i>  | Z13           | GEN, AMI, IMI, MER                     | 4    | 8    | 1    | >360 |     |     | c     |
| <i>A. baumannii</i>  | ATCC 19606    |                                        | 0.8  | 0.8  | 0.8  |      | 0.1 | 0.8 | d     |
| <i>P. aeruginosa</i> | NCTC 13437    | ESBL                                   | >16  | 11   | 11   | >180 |     |     | a     |
| <i>P. aeruginosa</i> | K12           | AMI, IMI, MER, CTZ, PIT                | >32  | >32  | 8    | >360 |     |     | c     |
| <i>P. aeruginosa</i> | K11           | IMI, MER, CTZ, PIT                     | >32  | 16   | 8    | >360 |     |     | c     |
| <i>P. aeruginosa</i> | PA01          | WT                                     | 3.1  | 3.1  | 0.8  |      | 0.1 | 6.3 | d     |
| <i>P. aeruginosa</i> | PA14          | WT                                     | 3.1  | 3.1  | 0.8  |      | 0.4 | 0.8 | d     |
| <i>E. coli</i>       | ATCC 25922    | WT                                     | 1    | 1    | 3    | 23   |     |     | a     |
| <i>E. coli</i>       | E1098         | GEN, AMI, IMI, MER                     | 1    | 2    | 4    | >360 |     |     | c     |
| <i>E. coli</i>       | ATCC 11775    |                                        | 1.6  | 1.6  | 0.8  |      | 0.1 | 0.2 | d     |
| <i>E. coli</i>       | AIC221        |                                        | 0.8  | 1.6  | 0.8  |      | 0.2 | 0.4 | d     |
| <i>E. coli</i>       | AIC222        | COL                                    | 1.6  | 1.6  | 1.6  |      | 0.2 | 0.4 | d     |

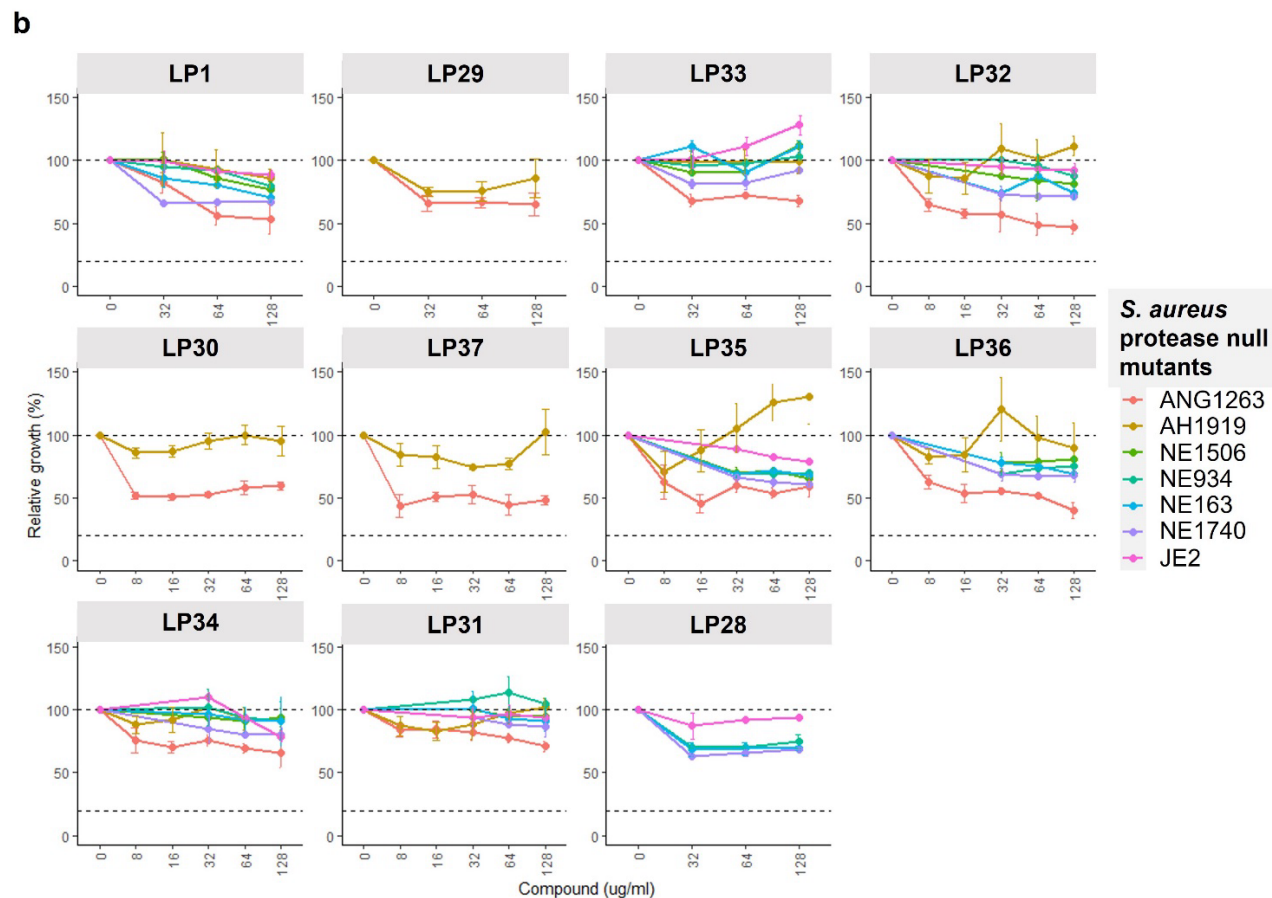

**Figure S3. *In vitro* antimicrobial activity.**

(a) Minimum inhibitory concentrations (MICs in  $\mu\text{M}$ ) of selected peptides and reference antibiotics (AMC, ampicillin; POL, polymyxin B; LEV, levofloxacin) against different ESKAPEE pathogens. The third column indicates either antibiotic resistance or strain details as follows: WT, wild type; VAN, vancomycin; AMX, amoxicillin; TEI, teicoplanin; =LNZ, linezolid; MET, methicillin; GEN, gentamicin; COL, colistin (polymyxin E); MER, meropenem; AMI, amikacin; IMI, imipenem; CTZ, chloramphenicol-tetracycline-zinc eugenol oxide; PIT, piperacillin; CTL, ceftazidime; MSSA, methicillin-susceptible *Staphylococcus aureus*; MRSA, methicillin-resistant *Staphylococcus aureus*; VISA, vancomycin-Intermediate *Staphylococcus aureus*; ESBL, extended-spectrum beta-lactamases. The MICs were obtained using four slightly different protocols, labelled a-d (see Experimental Section in the main text). (b) Antimicrobial activity against *S. aureus* null mutant strains. The plots depict growth of protease single mutants NE163 (USA300 JE2 *aur::Tn::Erm*), NE 1506 (USA300 JE2 *sspA::Tn::Erm*), NE934 (USA300 JE2 *sspB::Tn::Erm*), NE1740 (USA300 JE2 *scpA::Tn::Erm*) and protease null mutant strain AH1919 (LAC\*  $\Delta\text{aur}$   $\Delta\text{sspAB}$   $\Delta\text{scpA}$  *spl::erm*) together with control strains ANG1263 (ANG1575) and *S. aureus* USA300 (after the peptide treatment relative to the bacterial growth without peptides) as a function of peptide concentrations. The highest tested peptide concentration of 128  $\mu\text{g}/\text{mL}$  corresponds to  $\sim 30 \mu\text{M}$  and that of the reference antibiotic ampicillin corresponds to  $\sim 366 \mu\text{M}$ . Peptide sequences are provided in Table 1 in the main text.

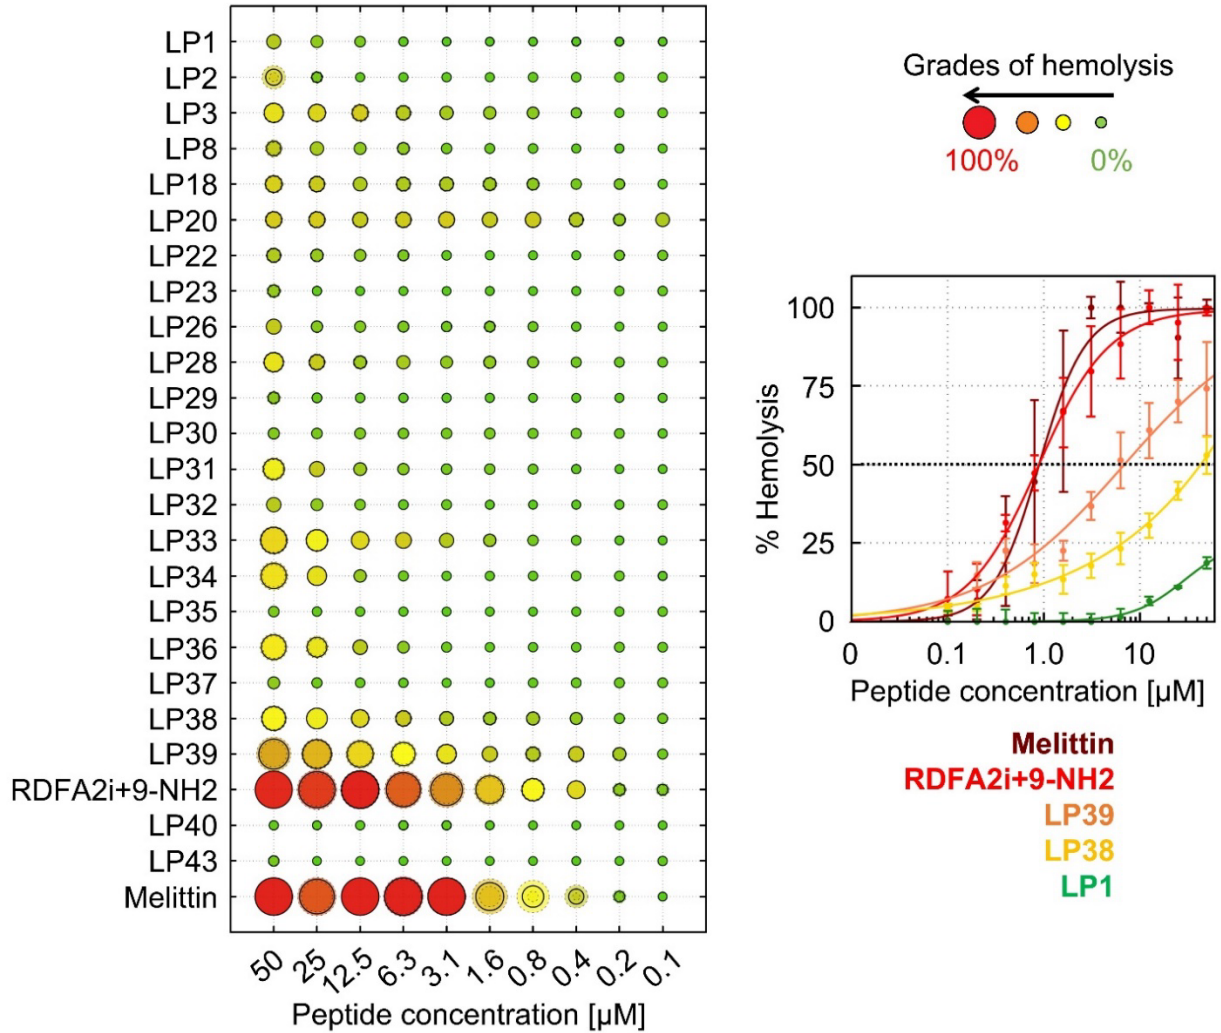

**Figure S4. *In vitro* toxicity against human red blood cells.**

(Left) Dilution series demonstrating peptide toxicity against the human red blood cells as a function of peptide concentration. Grades of hemolysis are as follows: red (100% hemolysis), orange to yellow (intermediate hemolysis), and green (0% hemolysis). Solid circles represent averages over triplicate measurements and dashed circles represent standard deviations. (Right) The normalized hemolysis plot, indicating the toxic peptide concentration that caused 50% lysis of human cells, i.e., IC<sub>50</sub> values. Peptide sequences are provided in Table 1 in the main text. Hemolytic peptide melittin was used as the reference.



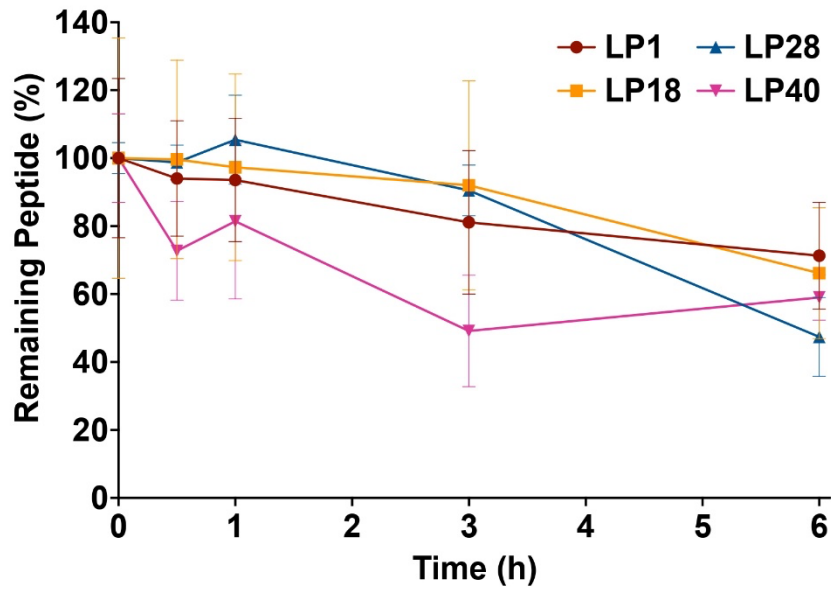

**Figure S5. *In vitro* stability in human serum.**

Peptide resistance to proteolytic degradation was assessed in 25% human serum and reported as the percentage of peptides remaining at various intervals over 6 hours. Peptide sequences are provided in Table 1 in the main text.

**a**

Group 1: LP1-treated

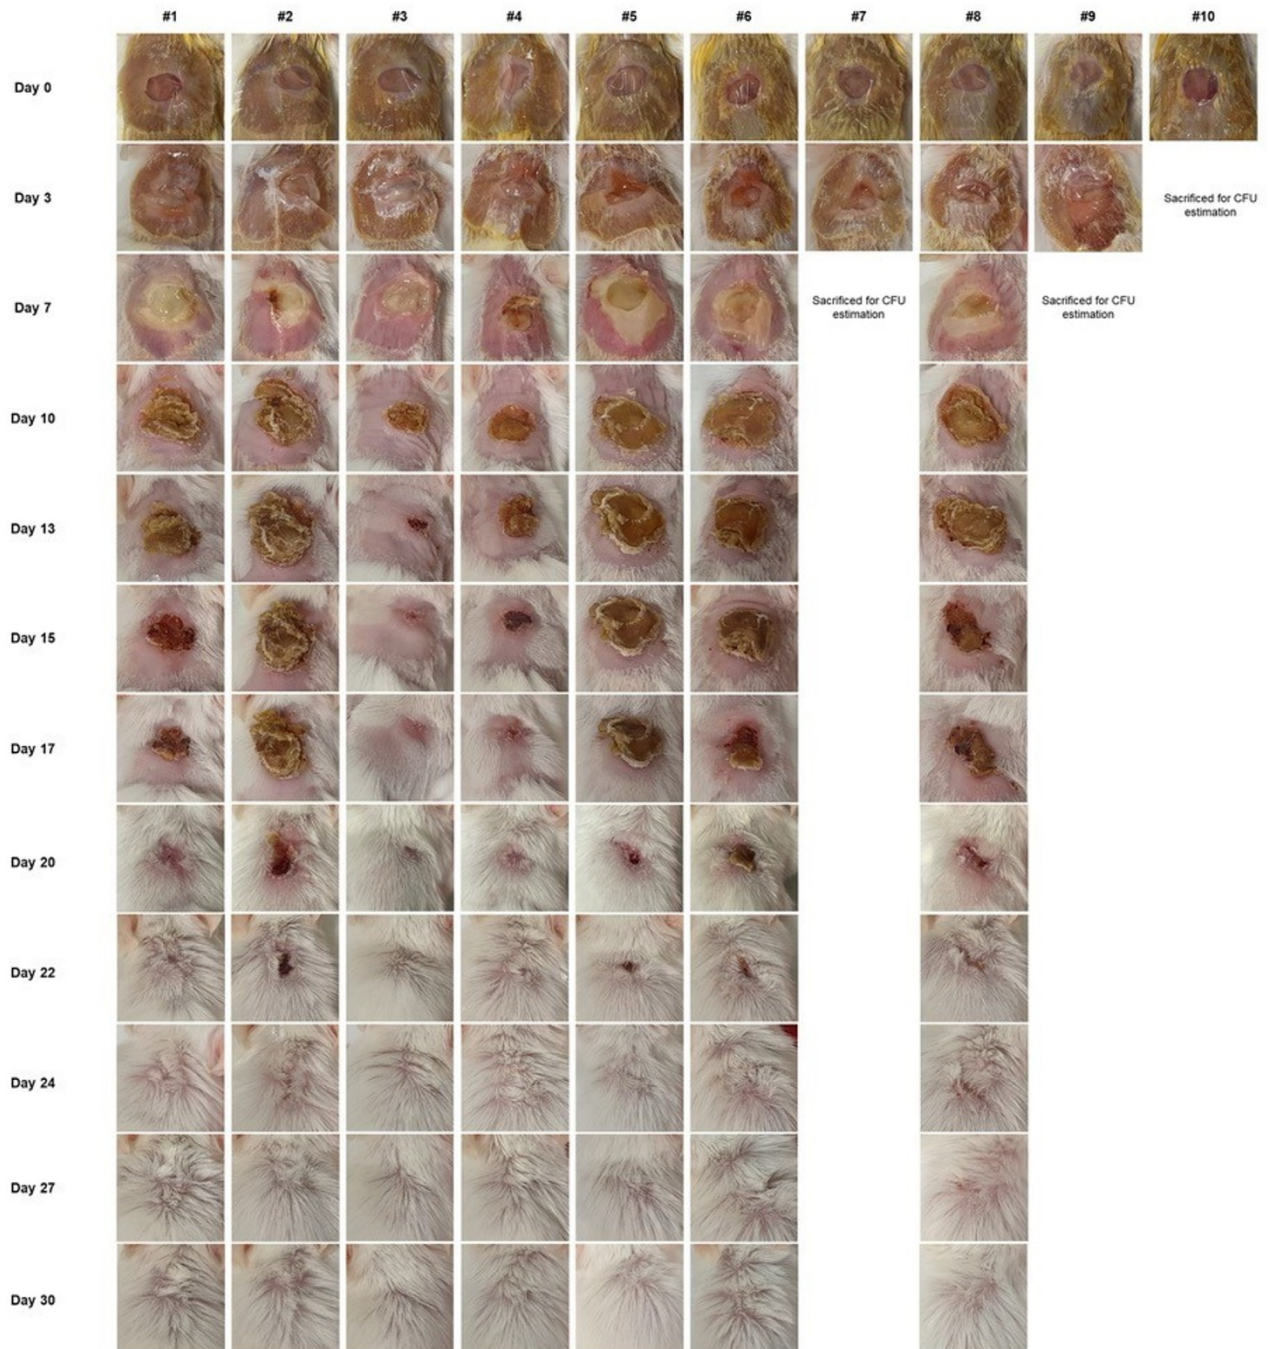

Group 2: LP18-treated

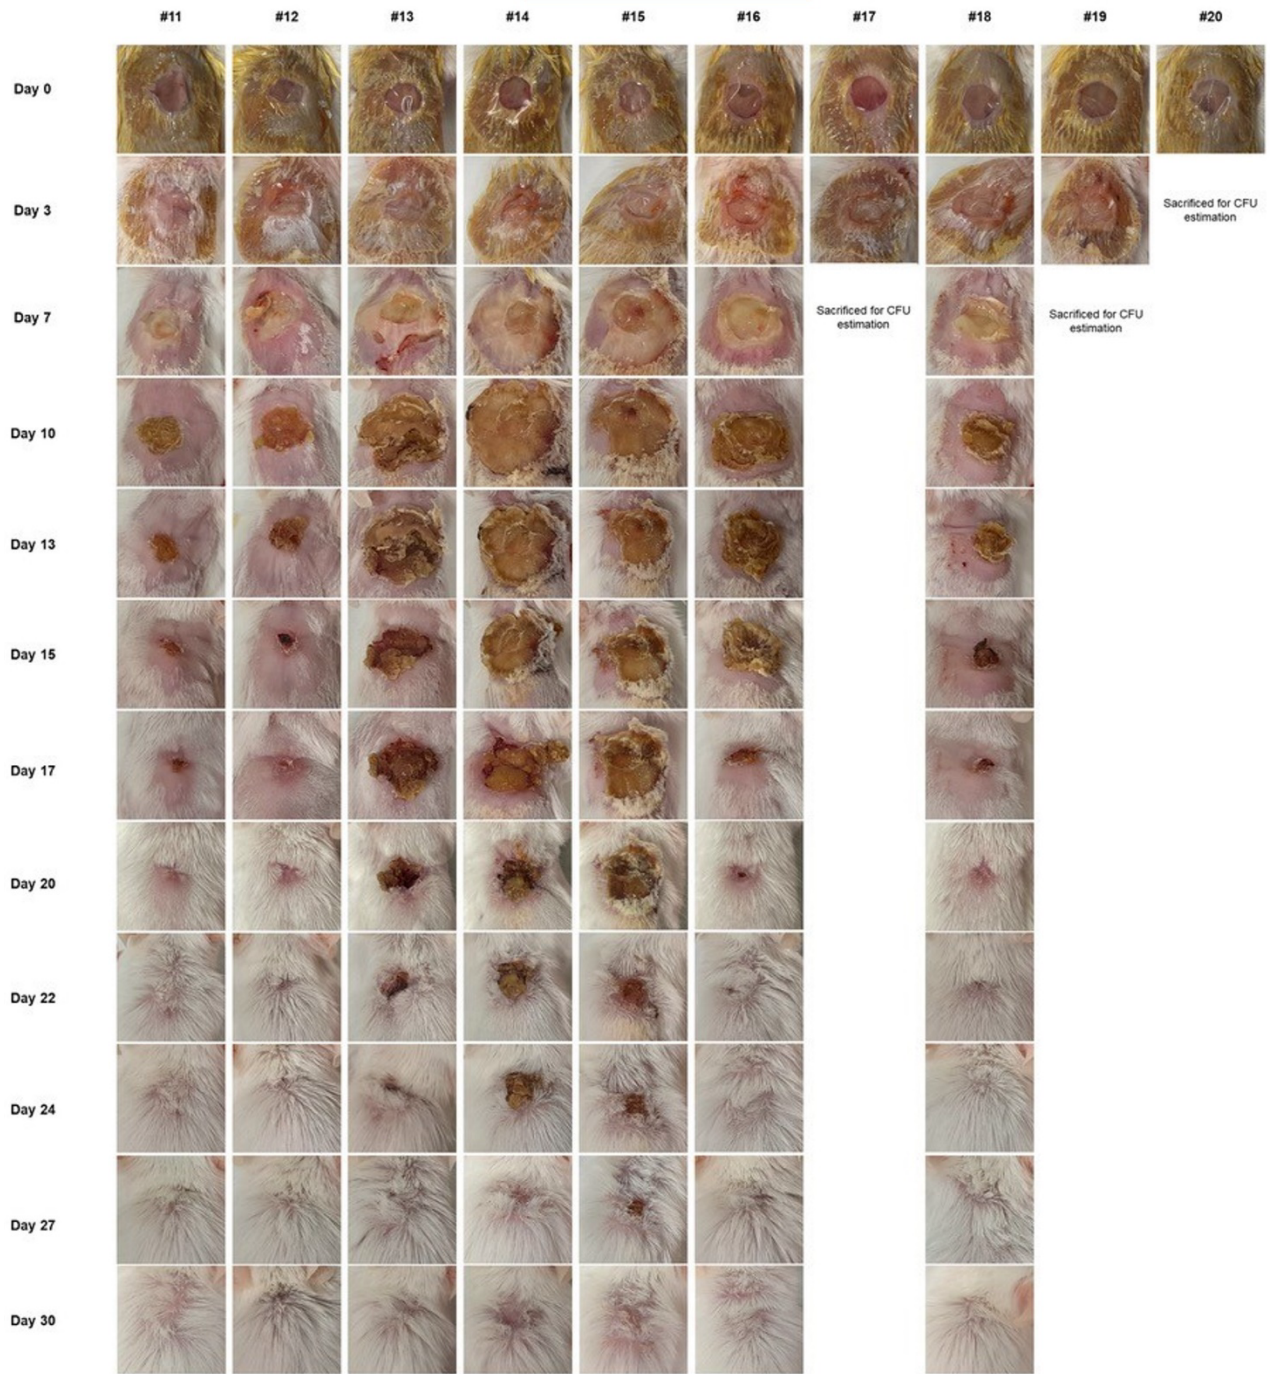

Group 3: PBS-treated

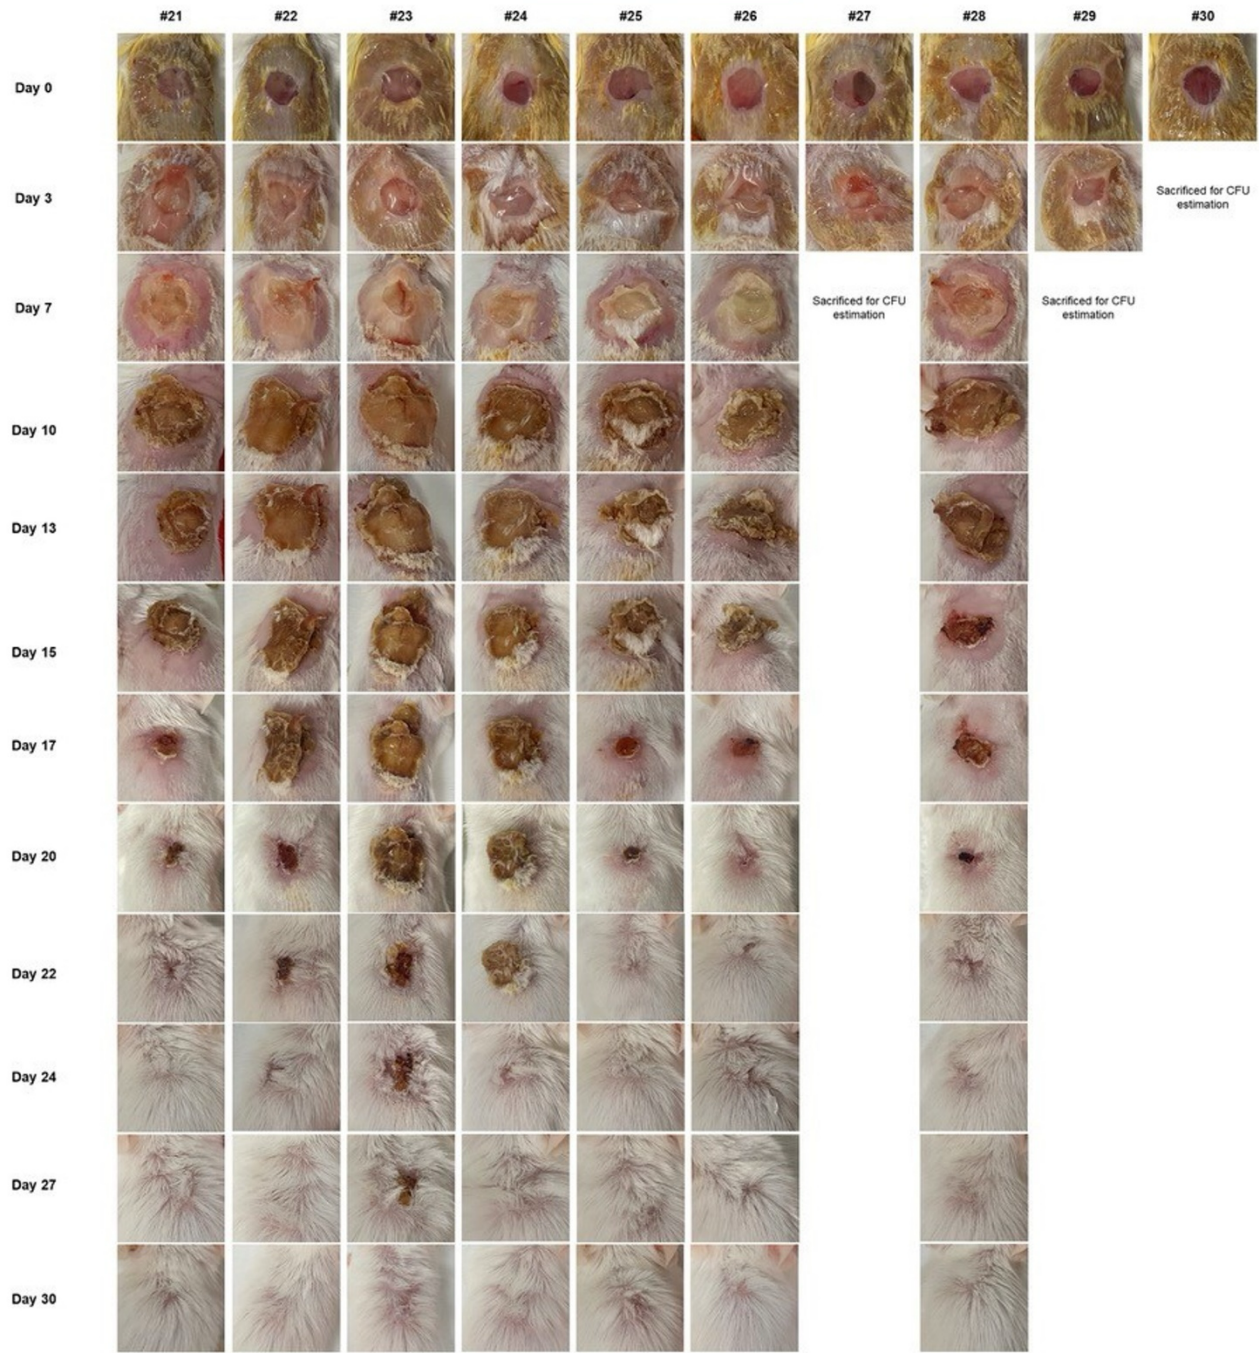

Group 4: No treatment control

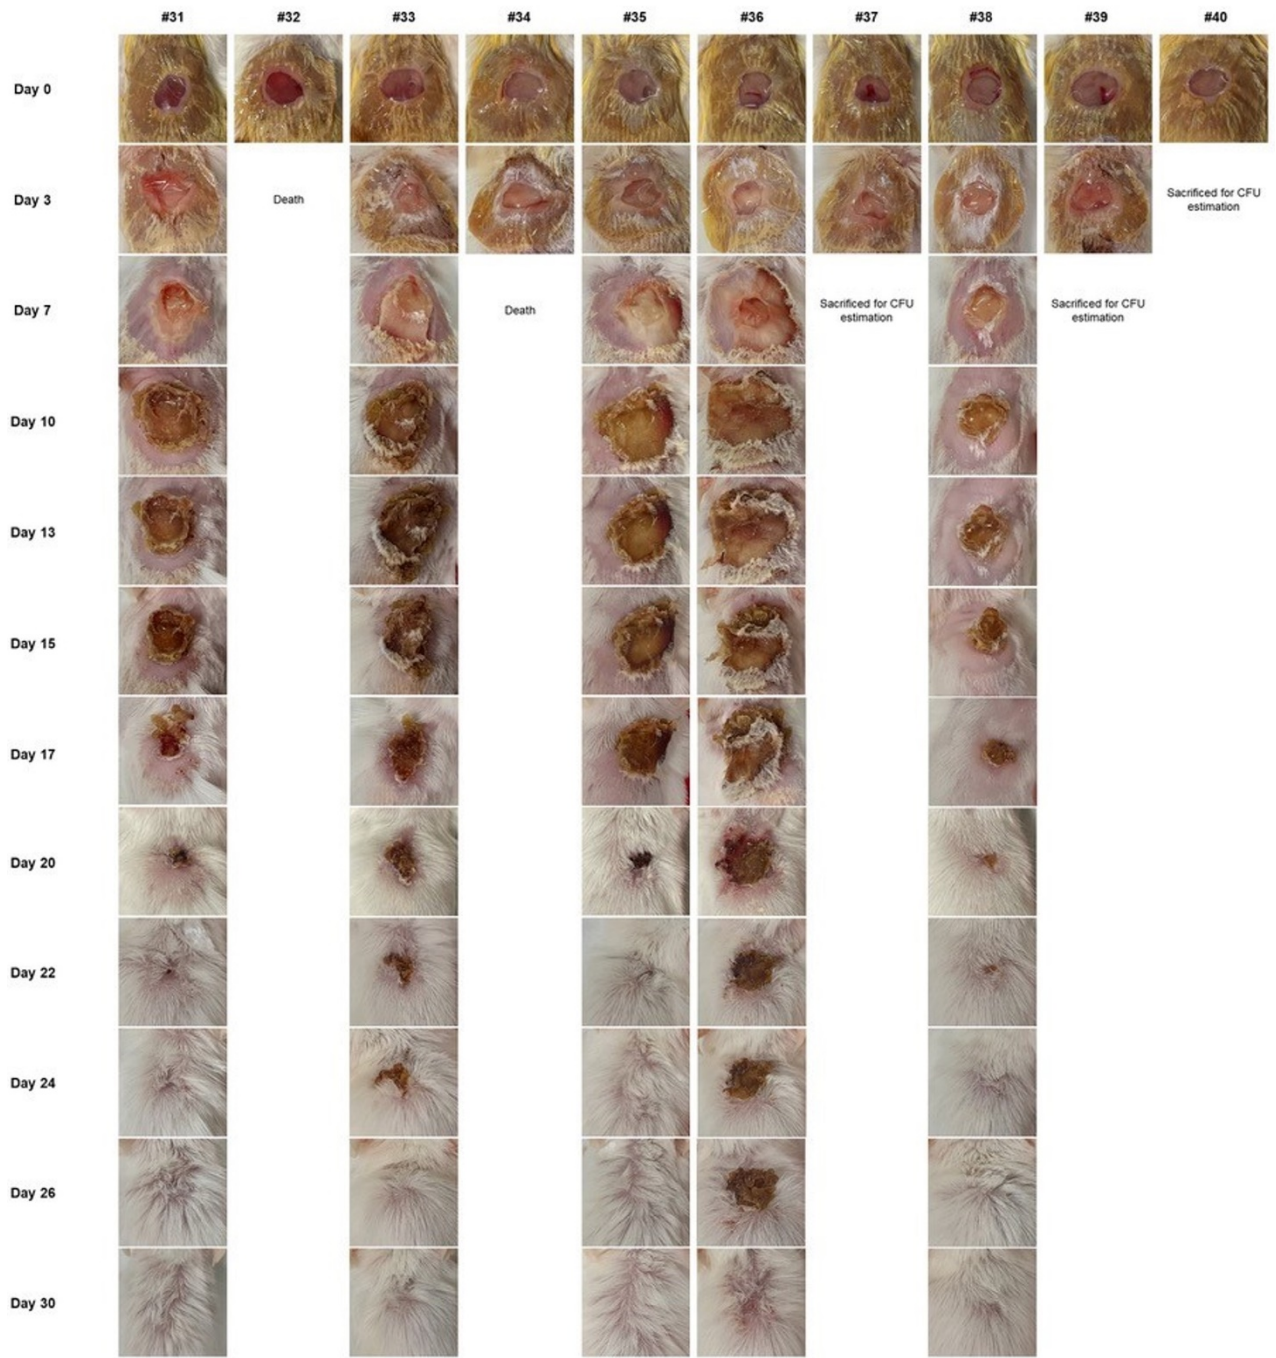

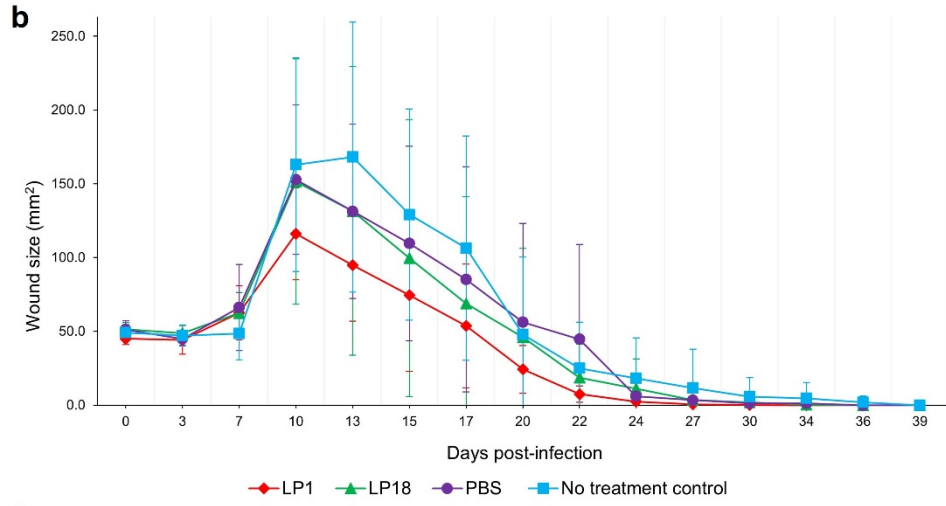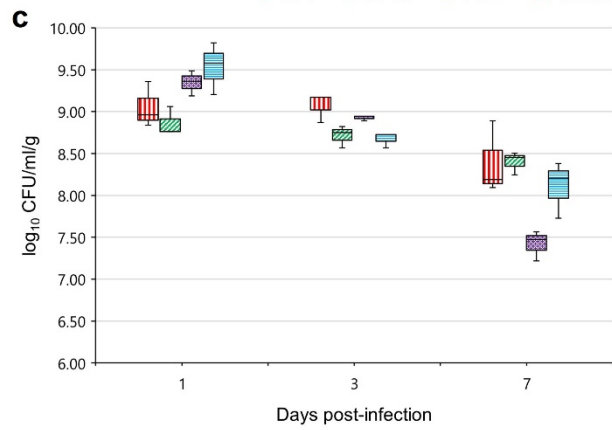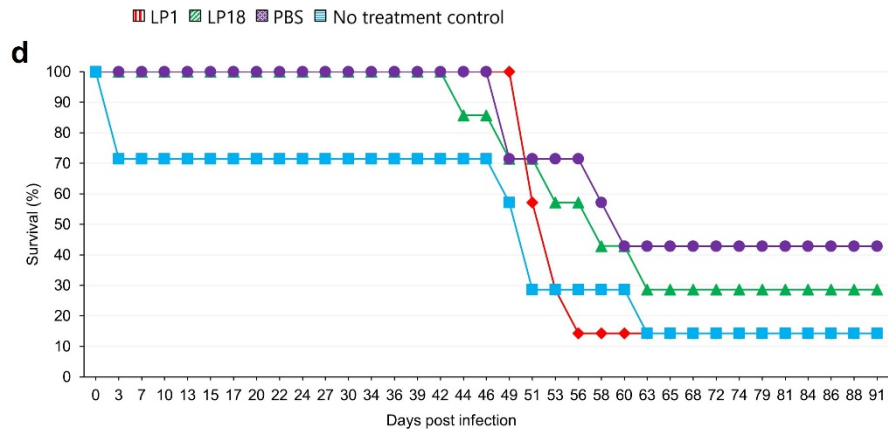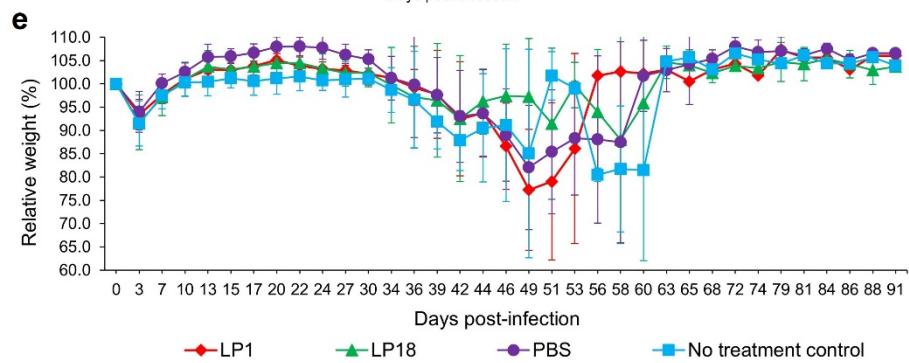

**Figure S6. *In vivo* antimicrobial and wound-healing activity in mice.**

(a) Excisional dorsal wounds were photographed with a 5-megapixel camera from the day of wounding (i.e., day 0) and on subsequent days until a complete wound closure was observed. (b) Wound size was measured using calipers based on the height and width of the wounds. (c) Box-and-whisker plots show the CFU tissue load, normalized to mouse weight, recovered from the wound beds on days 1, 3, and 7 postinfection. Boxes show medians and interquartile ranges, and whiskers show the lowest and highest values not classified as outliers. (d) Survival rate and (e) the relative change in body weight over the course of the experiment. Peptides were applied directly to the wound by puncturing the dressing with a sterile Hamilton syringe at 10000-fold MICs (i.e., 2.43 mM for LP1, and 0.95 mM for LP18). Peptide sequences are provided in Table 1 in the main text.

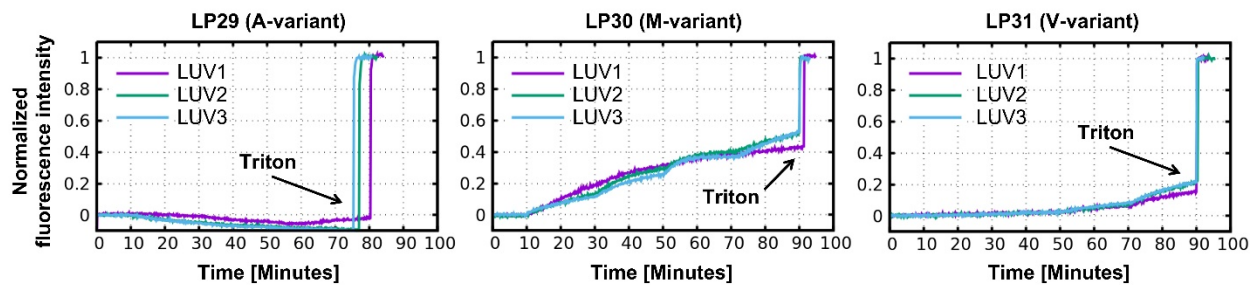

| Time (Minutes) | Peptide:Lipid ratio (mol/mol) |
|----------------|-------------------------------|
| 10             | 1:100                         |
| 30             | 1:50                          |
| 50             | 1:20                          |
| 70             | 1:10                          |

**Figure S7. *In vitro* dye leakage activity.**

Peptide-induced leakage (efflux) of the self-quenched fluorescent dye calcein from the large unilamellar vesicles composed of POPC:POPG (1:1 mol/mol) lipids, shown as the normalized fluorescent intensity as a function of the investigated peptide:lipid ratios over the time. Surfactant triton was used as the control, causing 100% leakage in the end.



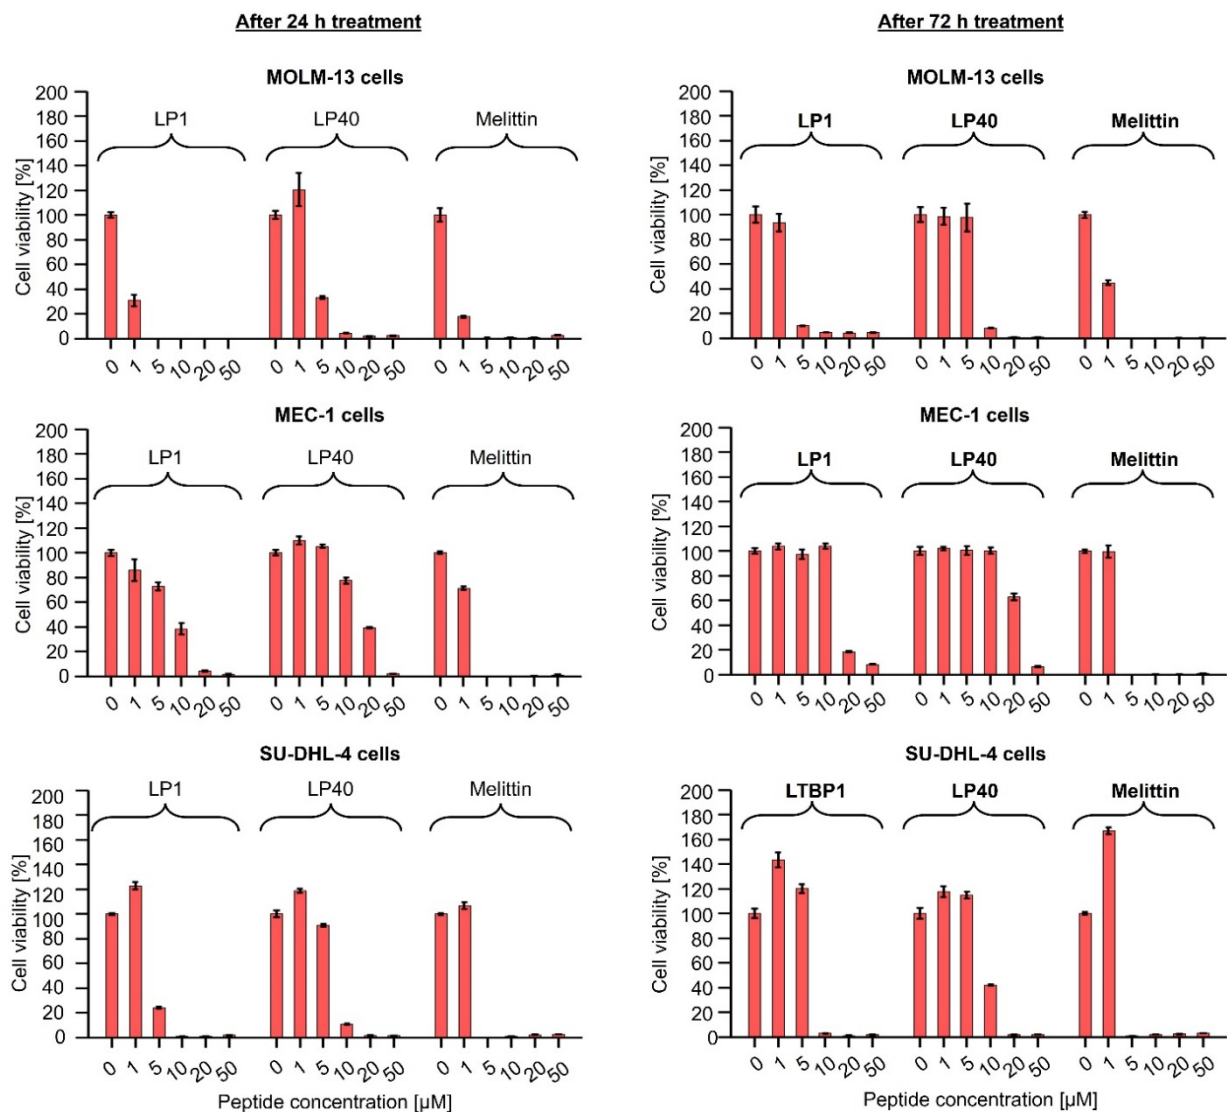

**Figure S8. *In vitro* anticancer activity.**

Activity of peptides against the leukemia and lymphoma cancer cell lines is reported as the percentage of cell viability (measured in quadruplicates) as a function of peptide concentration. Values are normalized to the control (set to 100%). Peptide sequences are provided in Table 1 in the main text.

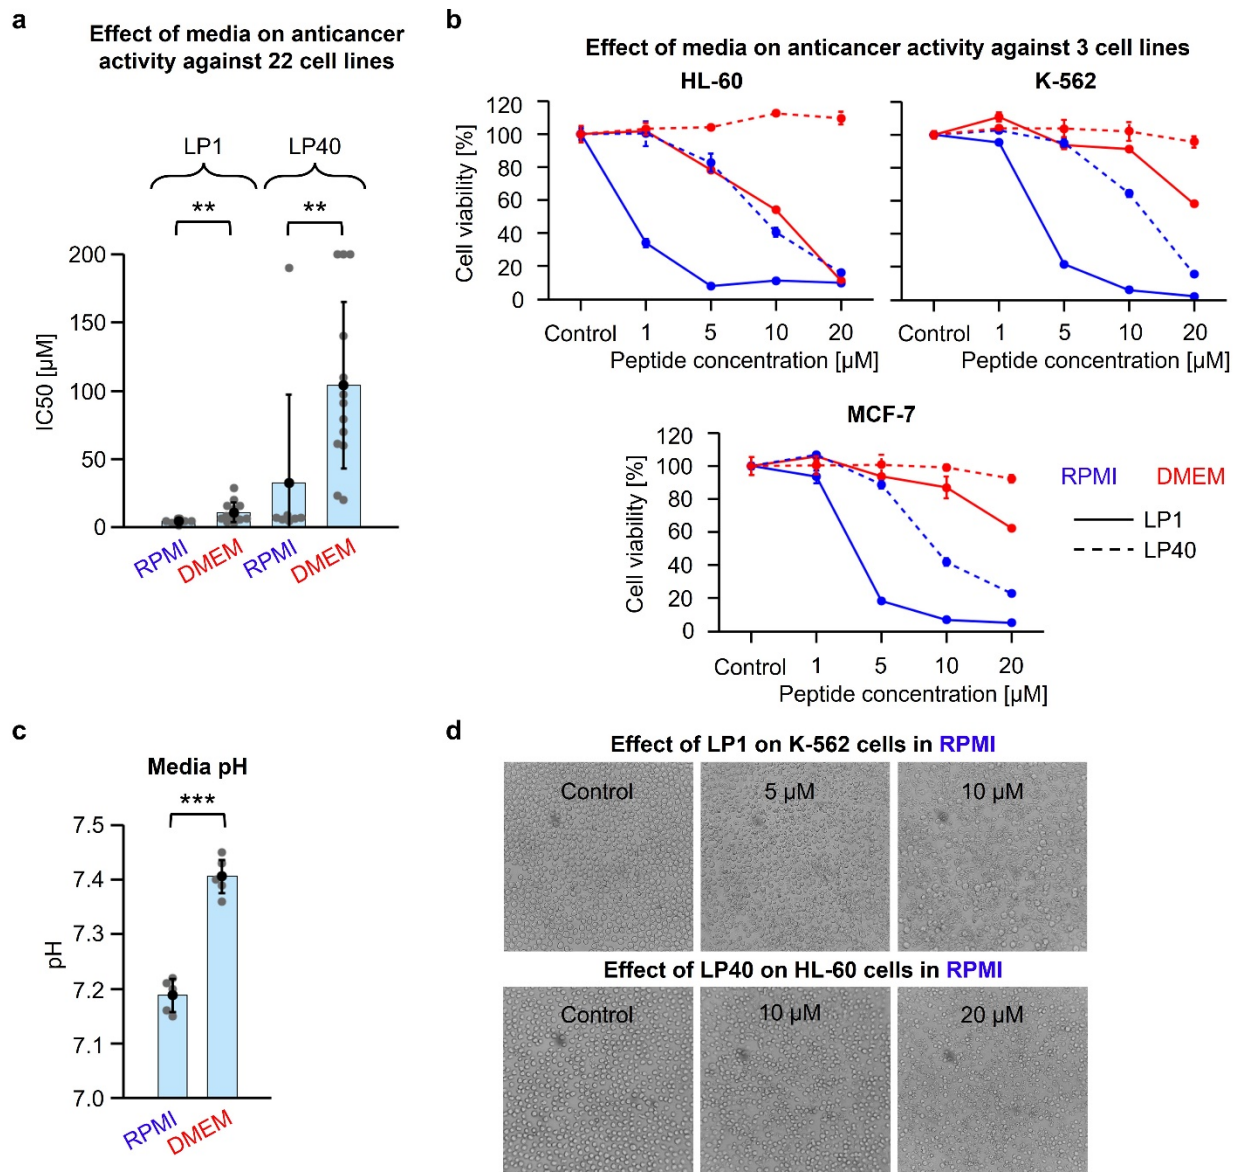

**Figure S9. Effect of media on anticancer activity.**

(a) Comparison of the activity (reported as the half maximal inhibitory concentration, IC<sub>50</sub> value) of the peptides against the viability of 22 different human cell lines cultured in either RPMI or DMEM media for 72 hours (the main text Figure 6a). (b) Comparison of the activity (reported as the percentage cell viability measured in quadruplicates) of the peptides against three cancer cell lines, HL-60, K-562 and MCF-7, cultured in RPMI and DMEM media for 4 hours. (c) Comparison of pH between RPMI and DMEM medium, measured in five repetitions. (d) Images showing the rapid effect of the peptides against cancer cell lines after 30 (LP1) or 60 (LP40) minutes of treatment. PBS buffer was used as the control. Peptide sequences are provided in Table 1 in the main text. (a and c) The effect of media was compared using t-test or a two-way ANOVA followed by the Tukey post hoc test. \*\*p < 0.01 and \*\*\*p < 0.001.

**a**

| pH        | RPMI    |       |        | DMEM    |        |       | PBS     |       |        |
|-----------|---------|-------|--------|---------|--------|-------|---------|-------|--------|
|           | Control | LP1   | LP40   | Control | LP1    | LP40  | Control | LP1   | LP40   |
| 6 vs. 8.0 | 0.991   | 0.020 | <0.001 | 0.981   | <0.001 | 0.002 | 0.225   | 0.157 | <0.001 |
| 6 vs. 7.6 | 0.959   | 0.036 | <0.001 | 0.771   | <0.001 | 0.001 | 0.189   | 0.464 | <0.001 |
| 6 vs. 7.0 | 0.654   | 0.180 | <0.001 | 0.991   | <0.001 | 0.001 | 0.994   | 0.562 | 0.054  |

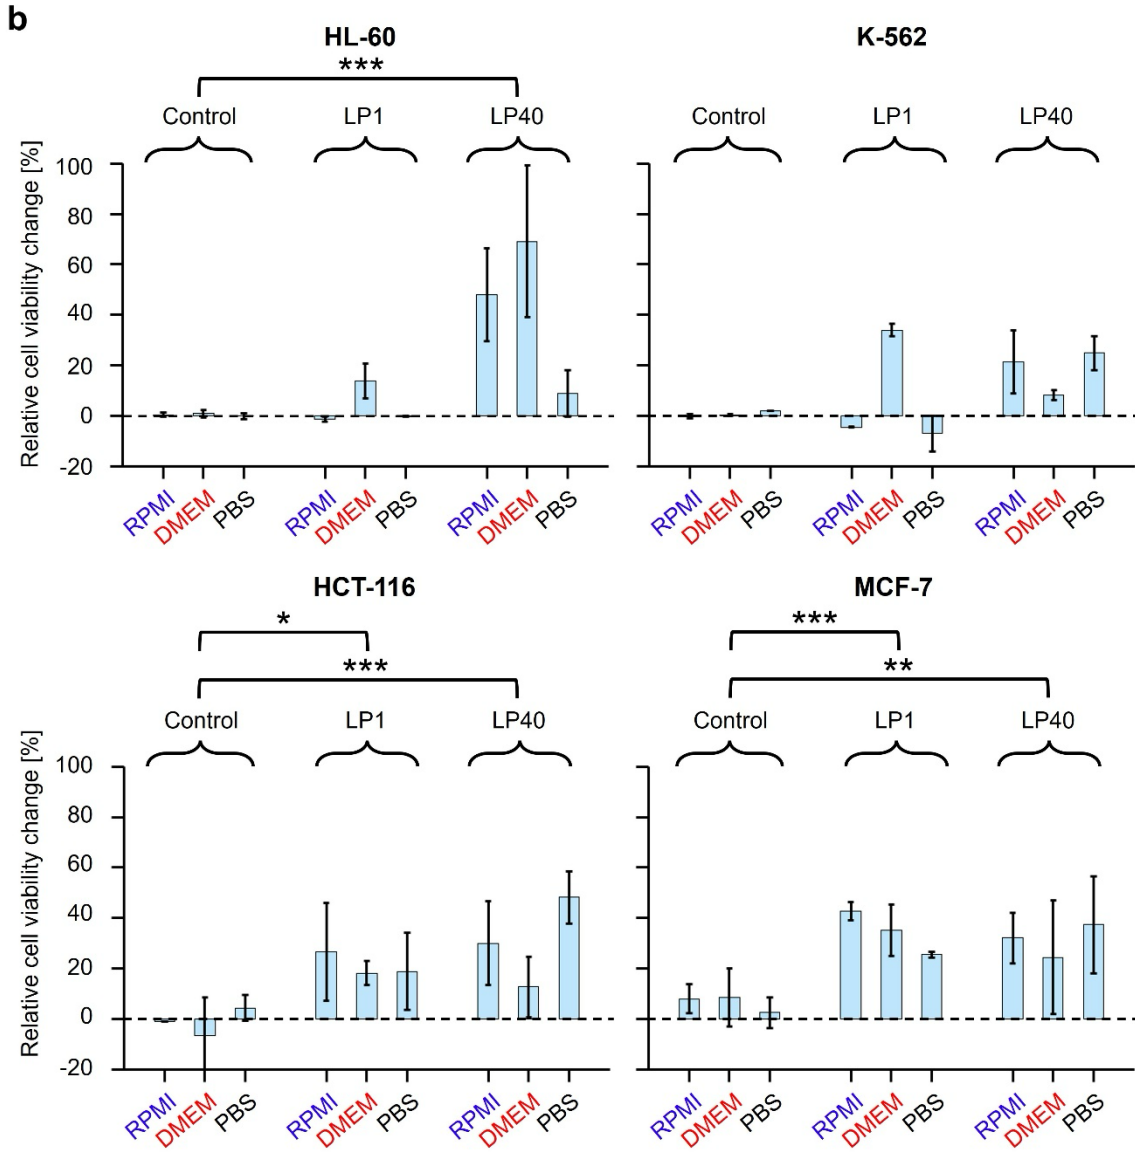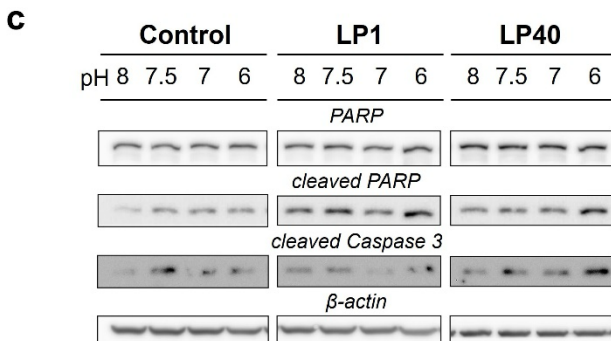

**Figure S10. Effect of pH and media on anticancer activity.**

(a) Statistical evaluation of peptide anticancer activity at 10  $\mu\text{M}$  concentration for 1 hour against four different cancer cell lines cultured in three different media, RPMI, DMEM and PBS, adjusted to different pH values (measured in duplicates; the main text Figure 6c). The analysis was done using a three-way ANOVA followed by the Tukey post hoc test. The values indicate the p-value of statistical significance, which is marked in red when less than 0.05. (b) Relative changes in the percentage cell viability with the change in pH from 7 to 6 in HL-60, K-562, HCT-166, and MCF-7 cells. Values are calculated as viability at pH 7 minus viability at pH 6. PBS buffer was used as the control. The overall effect of peptides across the cell lines was compared using four-way ANOVA followed by Tukey post hoc test which showed LP40 activity as more dependent on pH compared to LP1 ( $p = 0.002$ ). \* $p < 0.05$ ; \*\* $p < 0.01$ ; \*\*\* $p < 0.001$ ; not indicated = not significant. (c) Western blot showing that the ongoing apoptosis of MCF-7 cells treated with LP1 (5  $\mu\text{M}$ ) and LP40 (10  $\mu\text{M}$ ) peptides is dependent on the pH of the DMEM medium. Peptide sequences are provided in Table 1 in the main text.

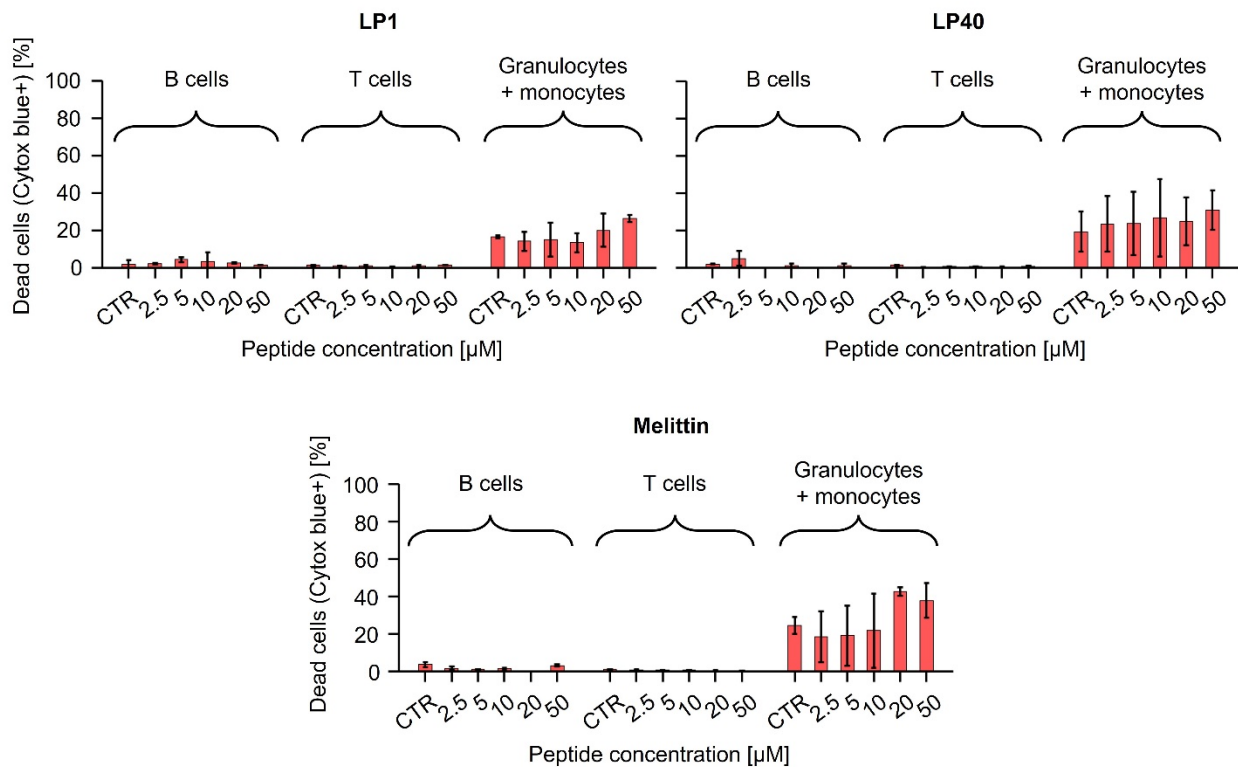

**Figure S11. Flow cytometric analysis of whole blood.**

The effect of peptides on the healthy primary cells in whole blood from a healthy donor was measured in duplicates. Peptide melittin and PBS buffer were used as controls.

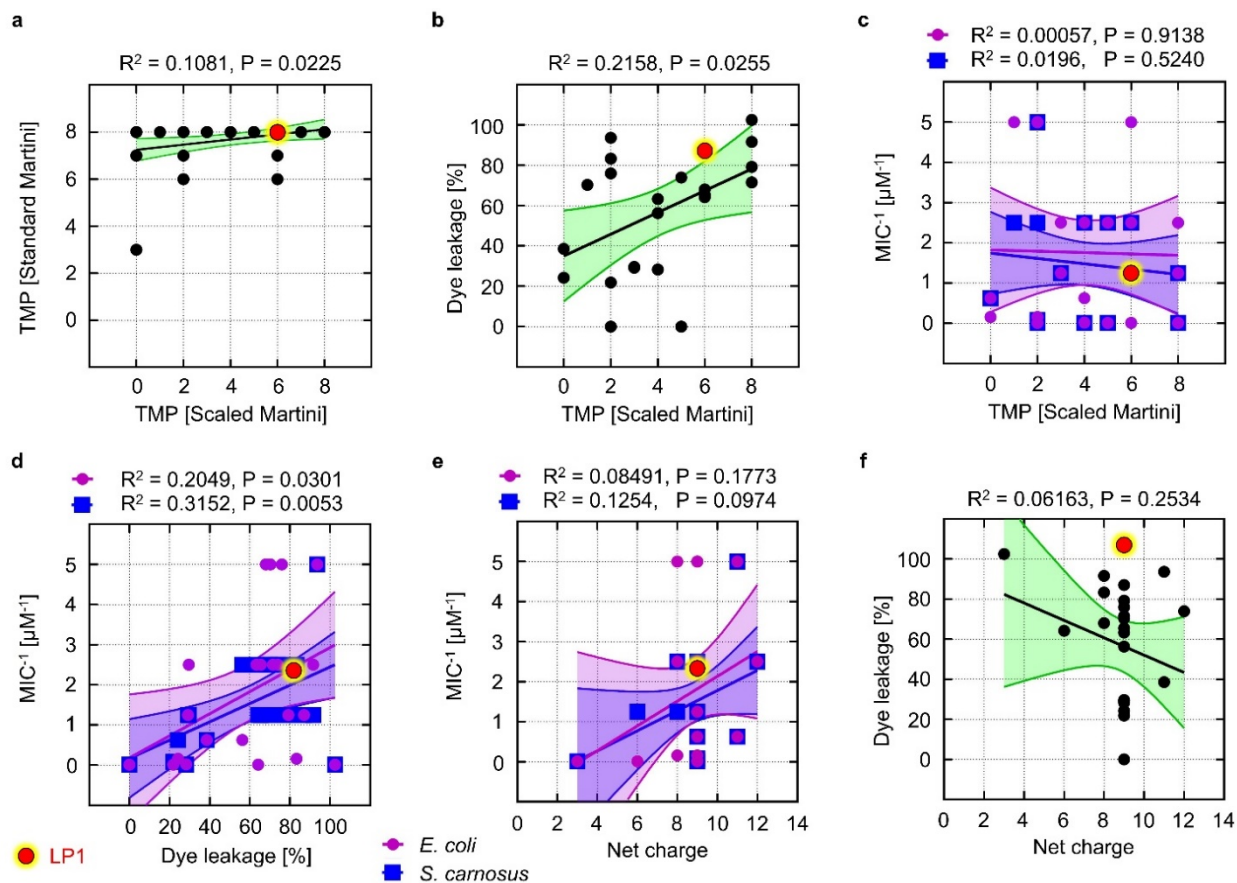

**Figure S12. Correlations between pore stability, *in vitro* activity, and peptide net charge.**

Linear regression analysis was performed - (a) between the number of transmembrane peptides after 51  $\mu$ s simulation run (denoted as TMP) using the standard and ‘scaled’ Martini force fields; (b-c) between the TMP using the ‘scaled’ Martini force field and (b) dye leakage and (c) antimicrobial activity; (d) between dye leakage and antimicrobial activity; and (e-f) between peptide net charge and (e) antimicrobial activity and (f) dye leakage. GraphPad Prism software was used for analysis and 95% confidence intervals are shown. Note that TMP indicates the stability of transmembrane barrel pores (TBPs). The pore was considered a ‘stable’ TBP if it consisted of at least six TMPs, i.e., hexamer; in the case of pentamer and tetramer, the pore was considered ‘deformed’; and finally, if there were less than four TMPs, the pore was considered ‘closed’. The percentage leakage of the fluorescent dye calcein at a peptide-to-lipid molecular ratio of 1:100 from the POPC:POPG (1:1 mol/mol) large unilamellar vesicles (see Table 2 in the main text) was used for analysis. Antimicrobial activity was used as the inverse of the MIC values (see Table 2 in the main text) for the analysis.

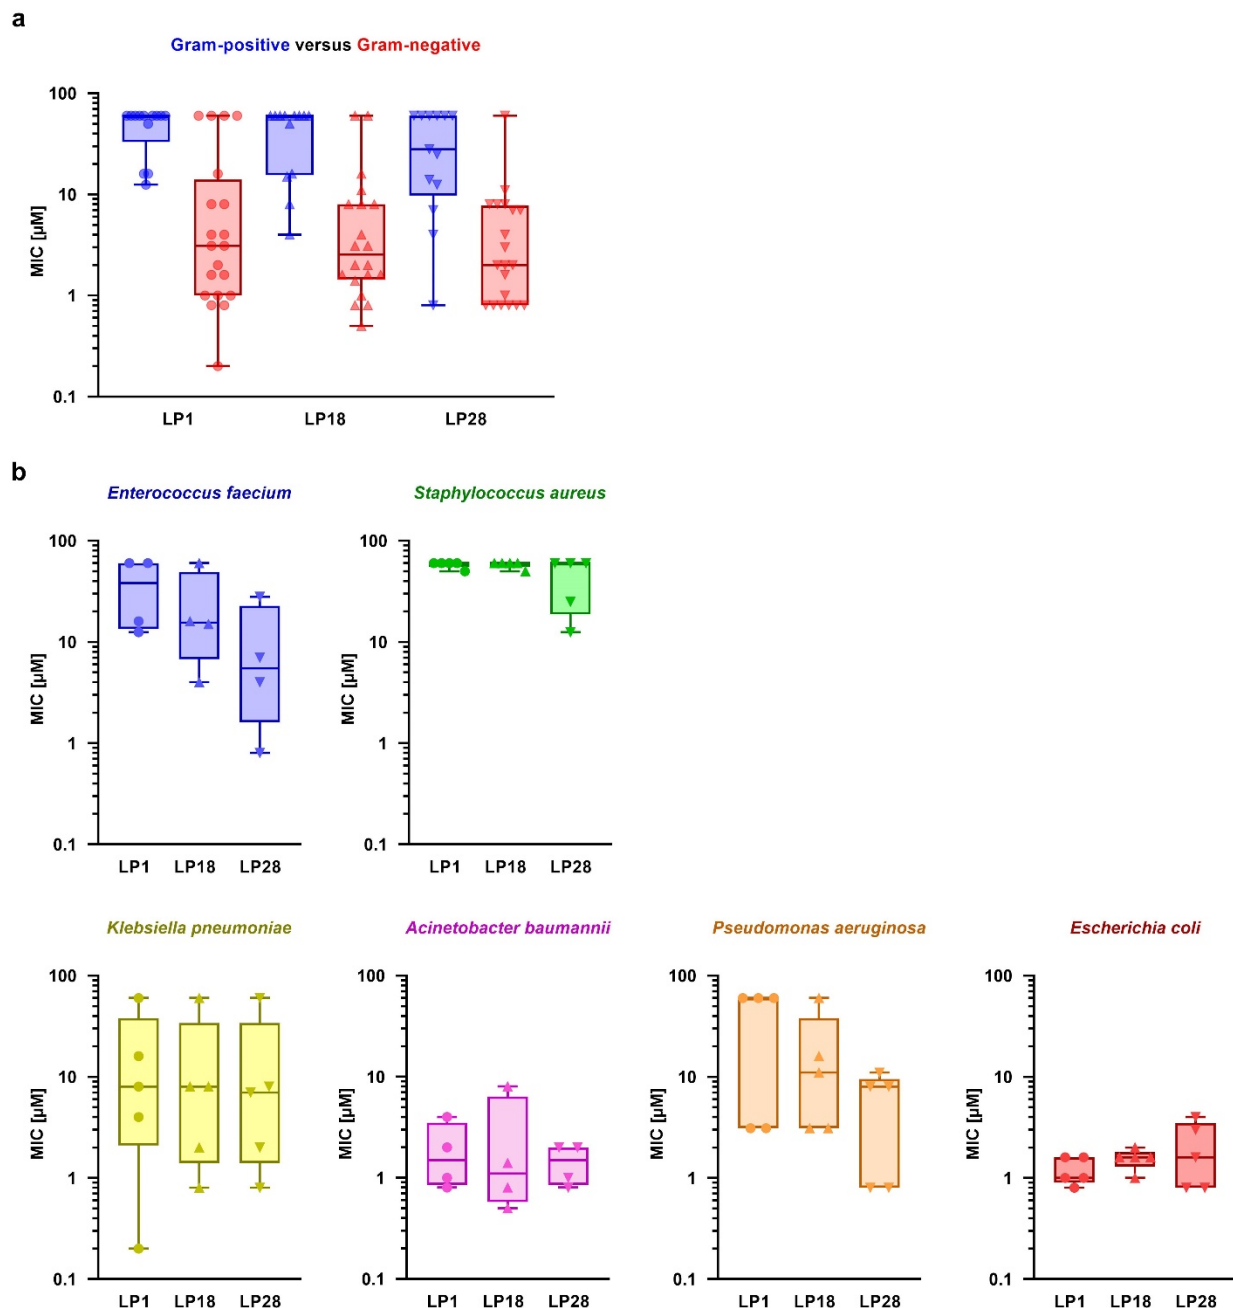

**Figure S13. Comparison of antimicrobial activity against Gram-positive and Gram-negative bacteria.** Box-whisker plots, showing the median, upper quartile, lower quartile, and whiskers from minimum to maximum, indicate the difference in antimicrobial activity of three peptides, LP1, LP18 and LP28, against Gram-positive and Gram-negative bacteria. The comparison was made considering all MIC values against a panel of 33 ESKAPEE pathogens tested in this study (see Figure 3a-d in the main text) using GraphPad Prism software. Note that the MIC value of the inactive cases, i.e., where the peptides remained inactive up to the highest concentrations tested, was uniformly considered to be 60  $\mu\text{M}$  (the highest concentration tested in Figure 3a-d in the main text). Peptide sequences are given in Table 1 in the main text.

## Supplementary Materials

Peptide LP1 = **K****K****K****L****K****K****I****L****K****K****L****F****Q****F****I****N****Q****L****D****N****Q****L****Q****D****I****K****Q****N****K**-NH<sub>2</sub>

### HPLC Certificate

HPLC Column (250×4.6mm I.D.) C18  
Detection wavelength 220 nm  
Gradient 20-50%B in 30 min  
Buffer A 0.05%TFA +2%CH<sub>3</sub>CN  
Buffer B 0.05%TFA +90%CH<sub>3</sub>CN

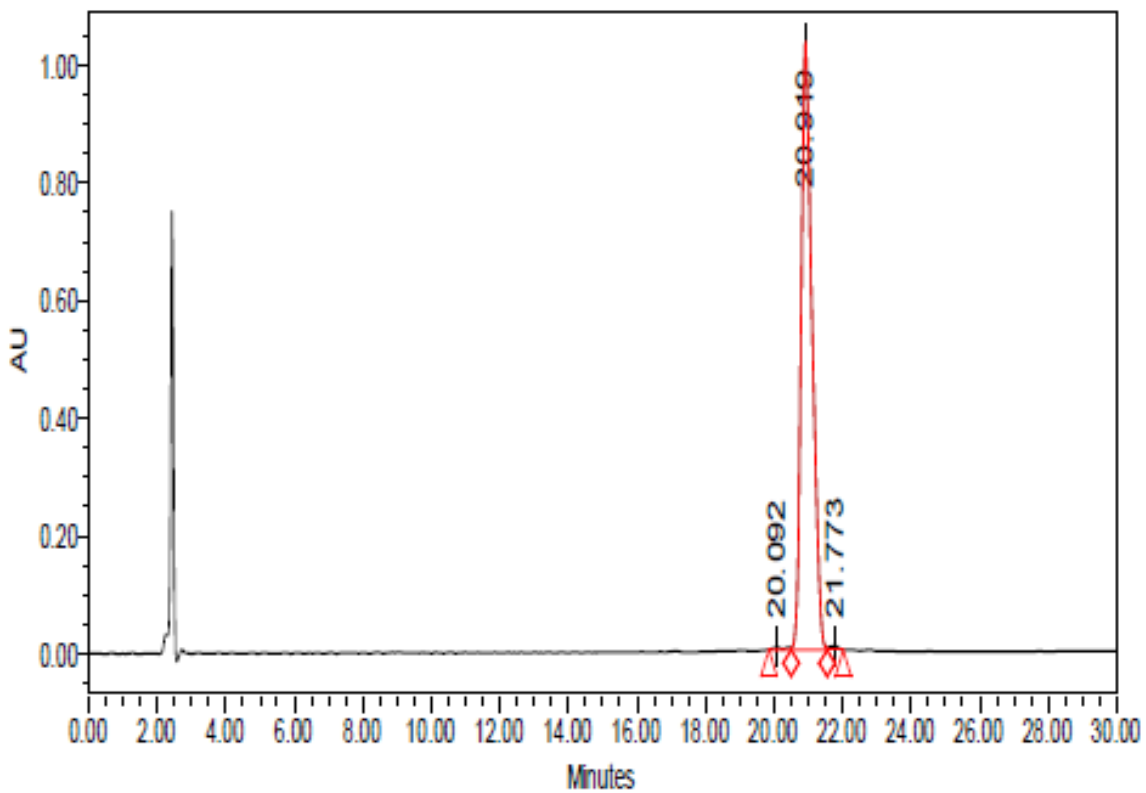

|   | Retention Time | Area     | % Area | Height  |
|---|----------------|----------|--------|---------|
| 1 | 20.092         | 106399   | 0.46   | 4330    |
| 2 | 20.919         | 22791833 | 98.97  | 1032662 |
| 3 | 21.773         | 131817   | 0.57   | 7096    |

## Mass Spectrometry Certificate

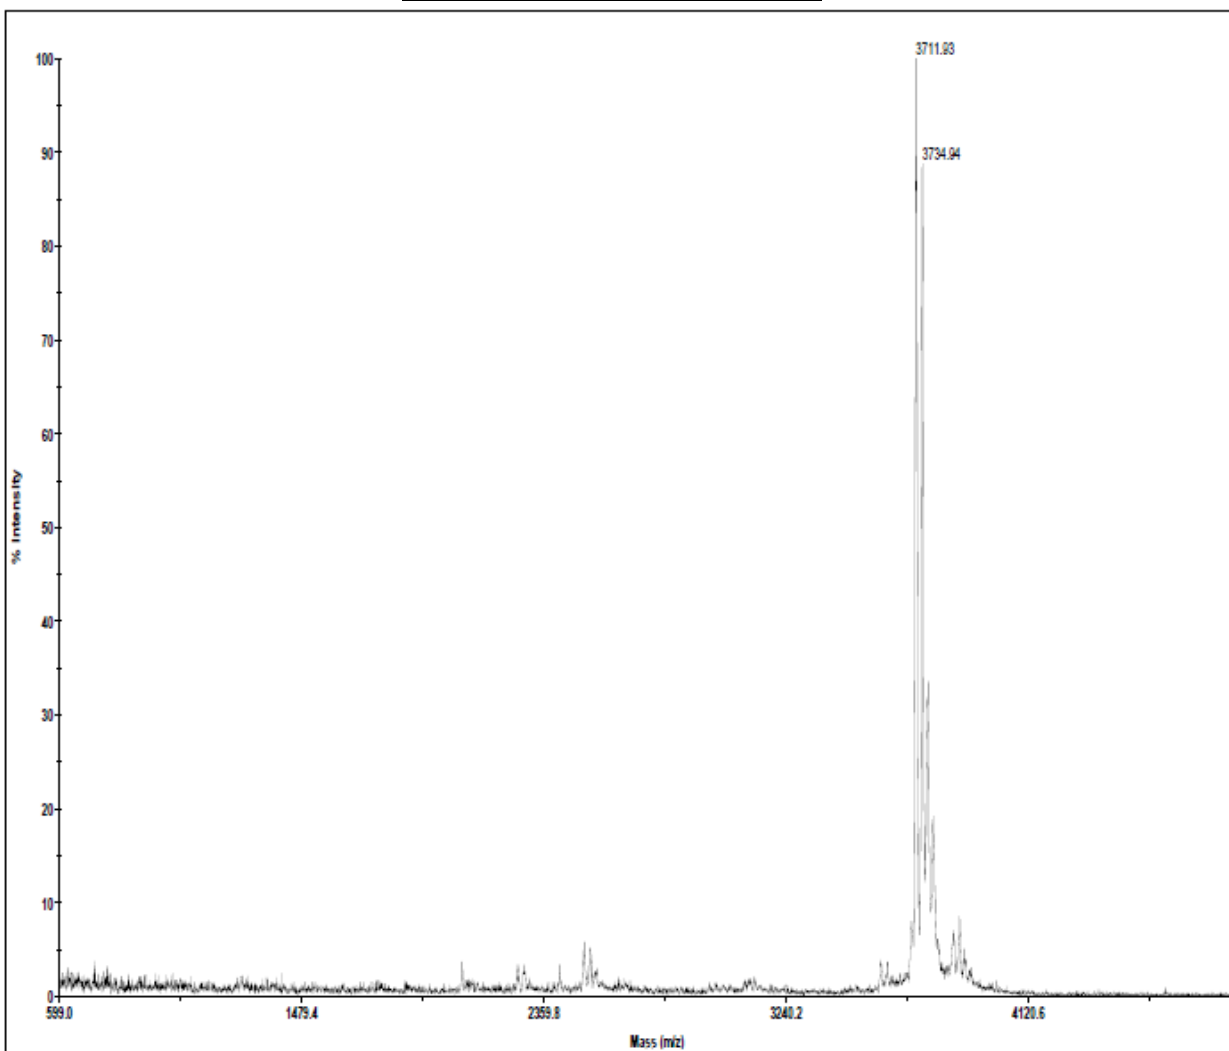

Lot No.: P111019-01-01

Method: MALDI-TOF

Main Peak: 3711.93

MW [M+H<sup>+</sup>]: 3711.93

MW: 3710.93

Theoretical MW: 3711.58

Match: Approved

Z=1



Peptide LP2 = **KKKKLKK**IL**KKLI**QLINQL**DNQLQD**IK**QNK**-NH<sub>2</sub>

**HPLC Certificate**

HPLC Column (250×4.6mm I.D.) C18  
 Detection wavelength 220 nm  
 Gradient 20-50%B in 30 min  
 Buffer A 0.05%TFA +2%CH<sub>3</sub>CN  
 Buffer B 0.05%TFA +90%CH<sub>3</sub>CN

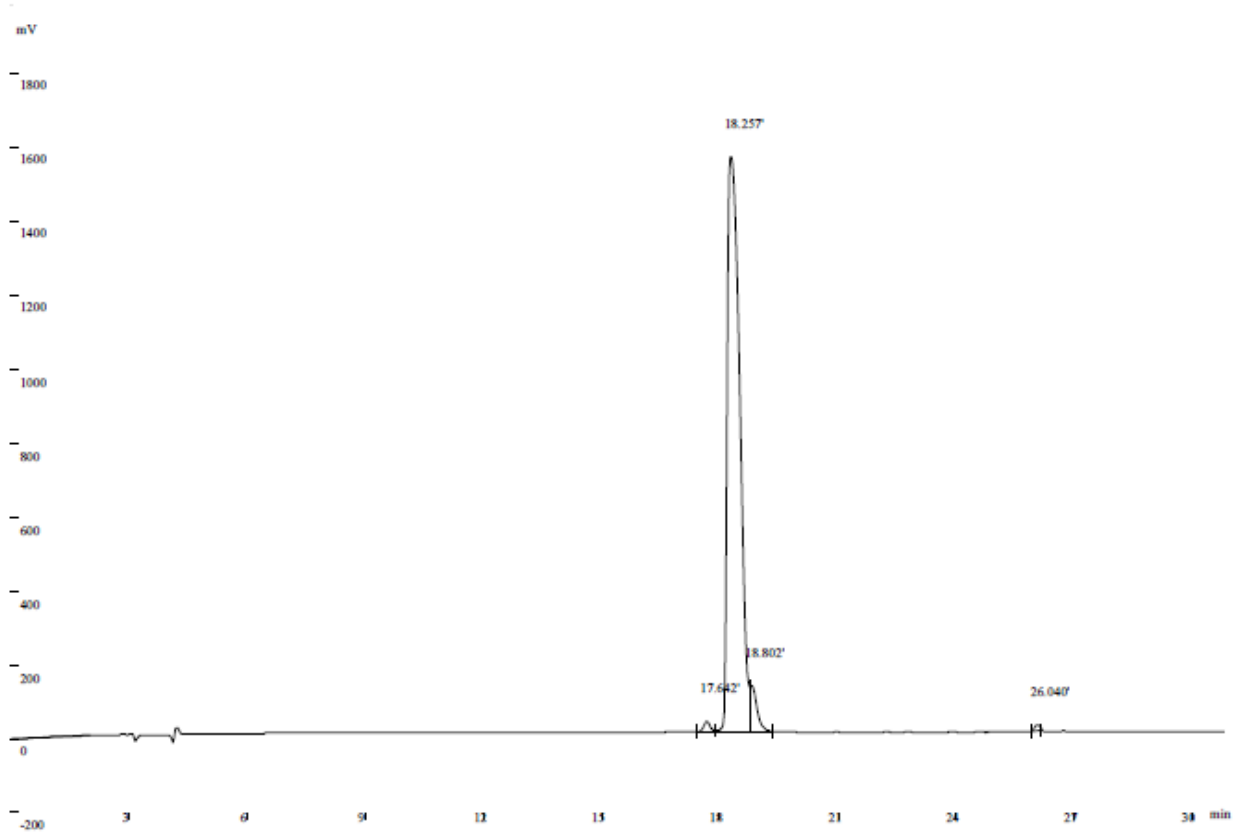

| Peak Results |        |          |          |         |
|--------------|--------|----------|----------|---------|
| Rank         | Time   | Quantity | Area     | Height  |
| 1            | 17.642 | 0.788    | 261152   | 26323   |
| 2            | 18.257 | 95.23    | 31564531 | 1553152 |
| 3            | 18.802 | 3.636    | 1205236  | 119613  |
| 4            | 26.040 | 0.3421   | 113367   | 14184   |
| Total        |        | 100      | 33144286 | 1713272 |

## Mass Spectrometry Certificate

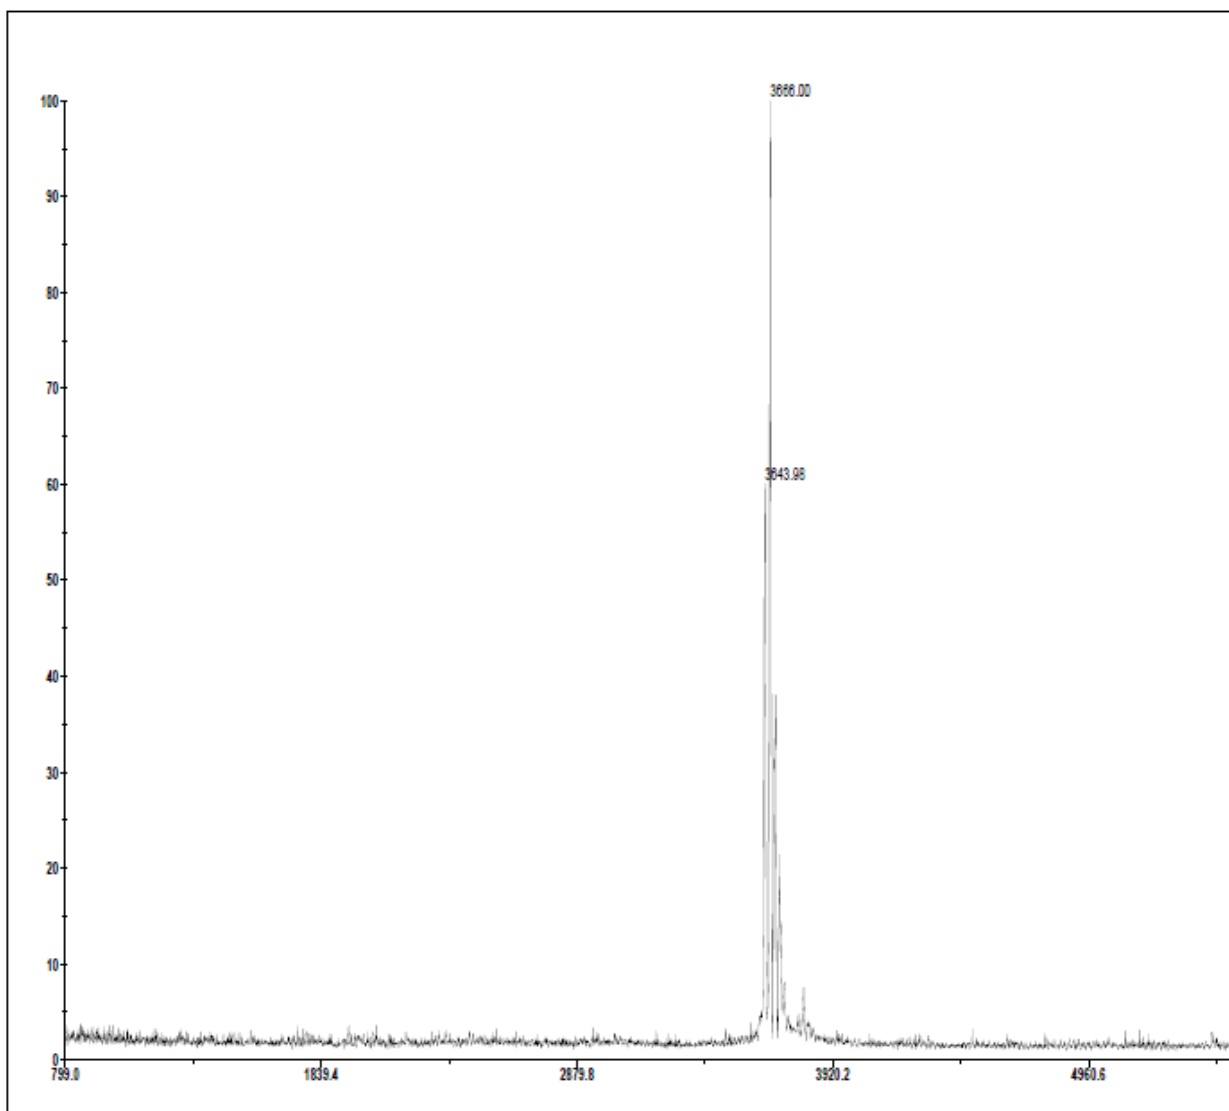

Lot No.: P061021-02-06

Method: MALDI-TOF

Main Peak: 3666.00

MW [M+Na<sup>+</sup>]: 3666.00

MW: 3643.00

Theoretical MW: 3643.54

Match: Approved

Z=1

Peptide LP3 = **KKKKL****KK**IL**KKL****WQW**INQL**D**NQL**QD**I**KQ**N**K**-NH<sub>2</sub>

**HPLC Certificate**

**HPLC Column** (250×4.6mm I.D.) C18  
**Detection wavelength** 220 nm  
**Gradient** 30-60%B in 30 min  
**Buffer A** 0.05%TFA +2%CH<sub>3</sub>CN  
**Buffer B** 0.05%TFA +90%CH<sub>3</sub>CN

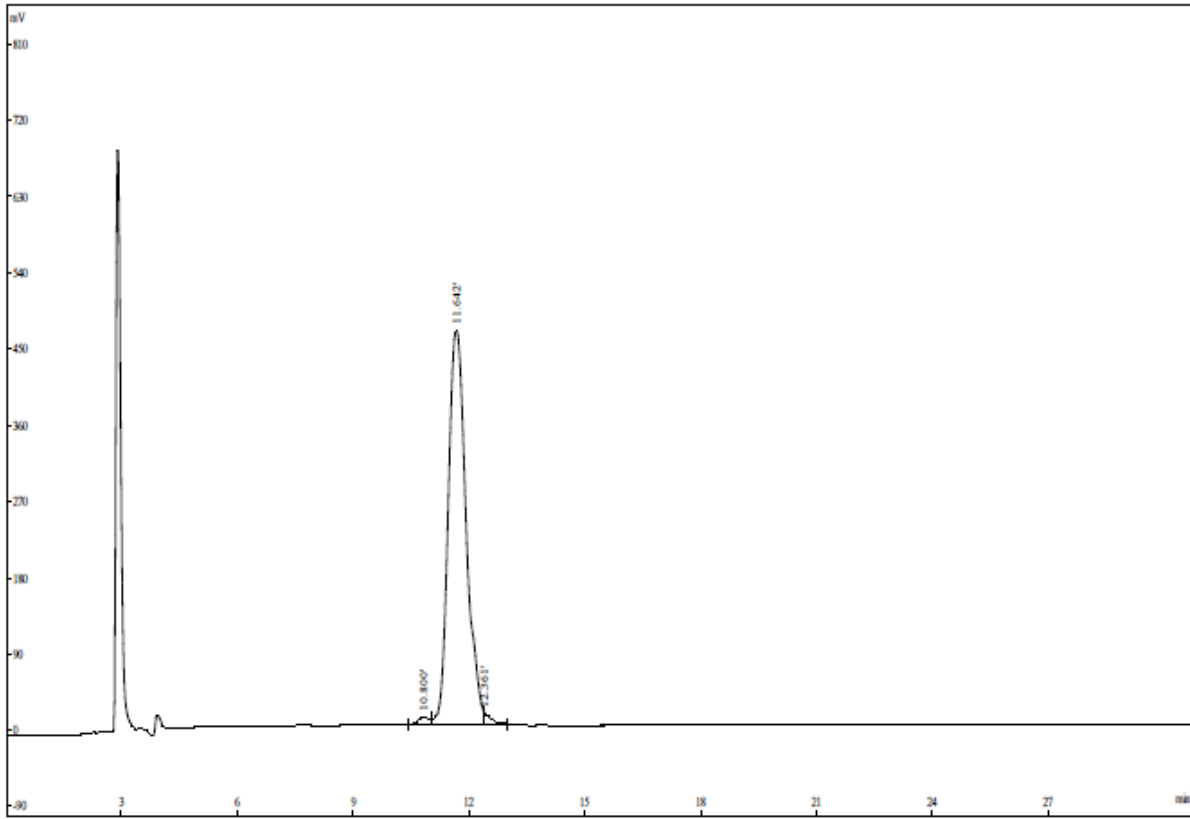

**Peak Results**

| Rank  | Time   | Quantity | Area     | Height |
|-------|--------|----------|----------|--------|
| 1     | 10.800 | 1.187    | 173204   | 8539   |
| 2     | 11.642 | 97.73    | 14257872 | 463926 |
| 3     | 12.361 | 1.078    | 157240   | 13178  |
| Total |        | 100      | 14588316 | 485643 |

## Mass Spectrometry Certificate

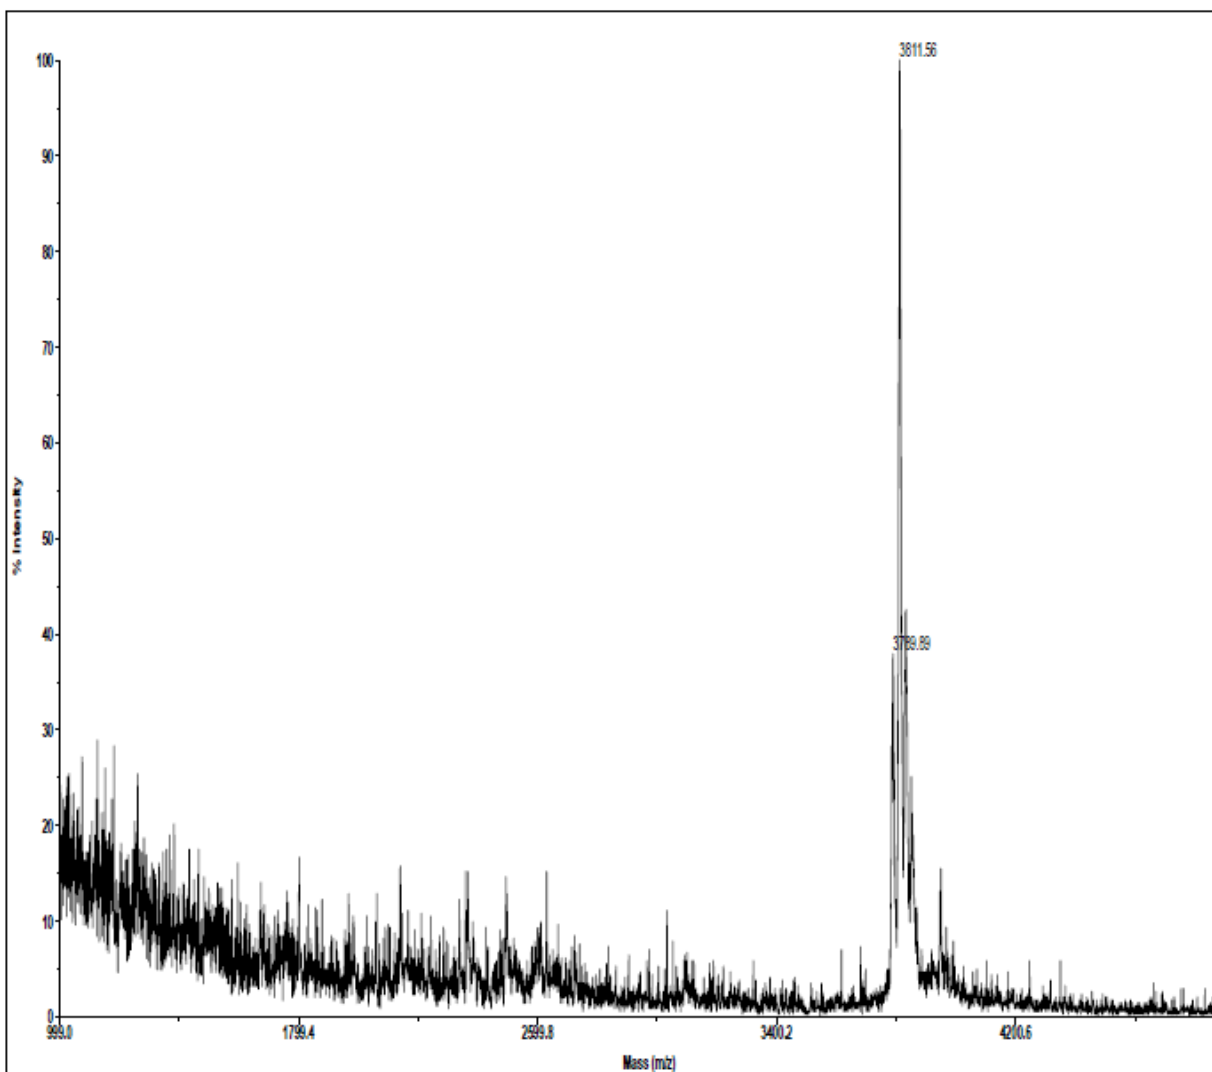

Lot No.: P300720-01-01

Method: MALDI-TOF

Main Peak: 3811.56

MW [M+Na<sup>+</sup>]: 3811.56

MW: 3788.56

Theoretical MW: 3789.65

Match: Approved

Z=1

Peptide LP8 = **K****K****K****L****K****K****I****L****K****K****L****F****Q****F****I****N****Q****L****E****N****Q****L****Q****E****I****K****Q****N****K**-NH<sub>2</sub>

**HPLC Certificate**

**HPLC Column** (250×4.6mm I.D.) C18  
**Detection wavelength** 220 nm  
**Gradient** 30-60%B in 30 min  
**Buffer A** 0.05%TFA +2%CH<sub>3</sub>CN  
**Buffer B** 0.05%TFA +90%CH<sub>3</sub>CN

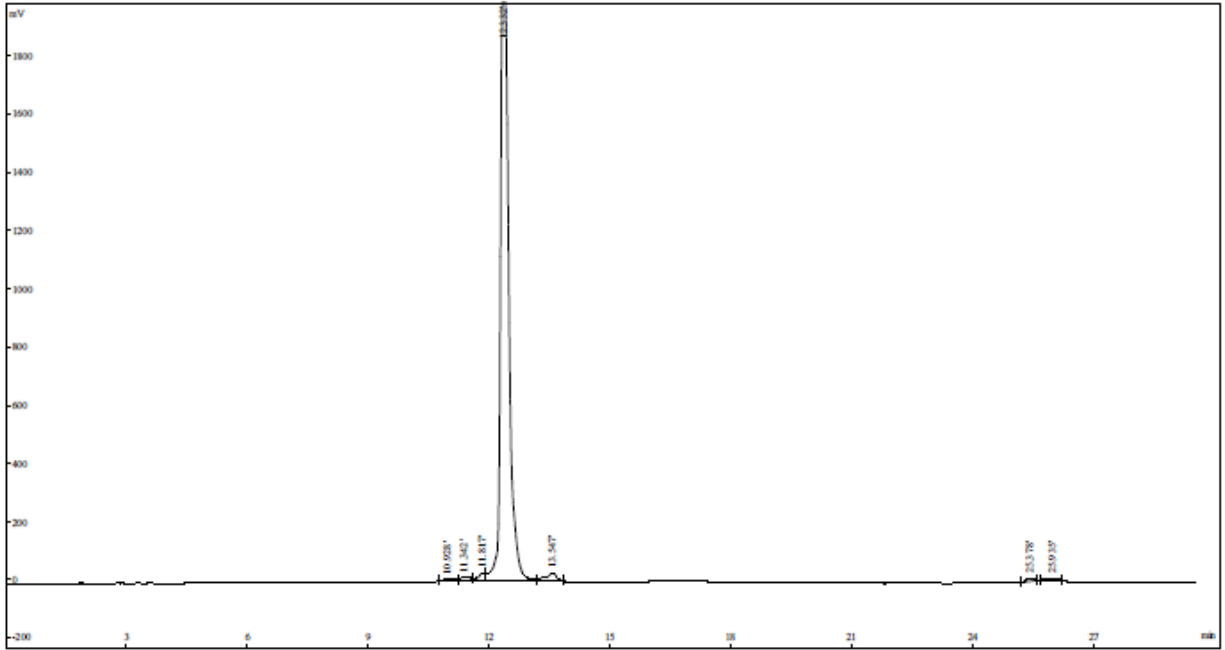

**Peak Results**

| Rank  | Time   | Quantity | Area     | Height  |
|-------|--------|----------|----------|---------|
| 1     | 10.928 | 0.3776   | 106910   | 3671    |
| 2     | 11.342 | 0.6806   | 192716   | 11808   |
| 3     | 11.817 | 1.138    | 322298   | 28013   |
| 4     | 12.332 | 95.52    | 27047110 | 2003854 |
| 5     | 13.547 | 1.599    | 452735   | 28526   |
| 6     | 25.378 | 0.2992   | 84724    | 7332    |
| 7     | 25.935 | 0.3831   | 108463   | 6016    |
| Total |        | 100      | 28314956 | 2089220 |

## Mass Spectrometry Certificate

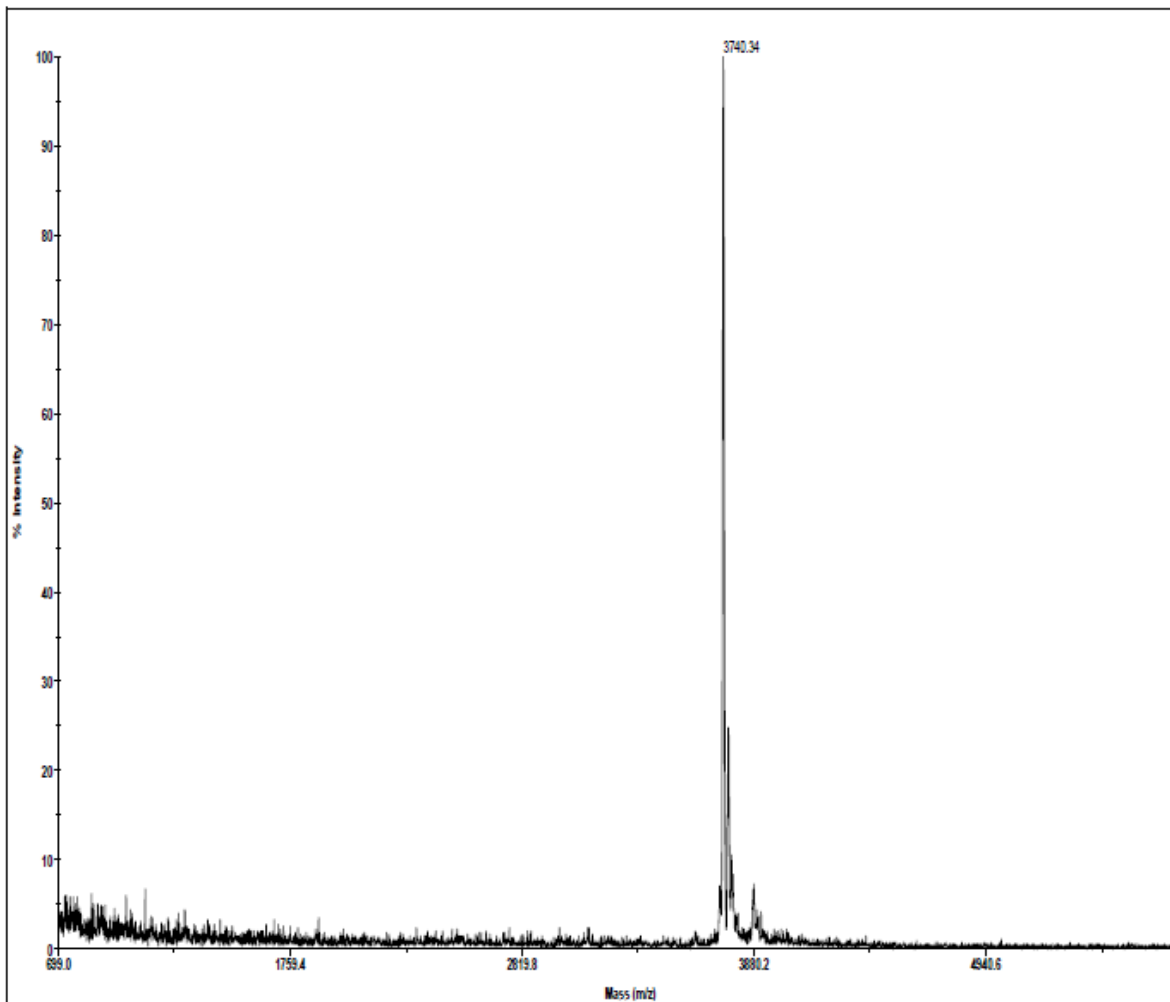

Lot No.: P300720-01-08  
Method: MALDI-TOF  
Main Peak: 3740.34  
MW [M+H<sup>+</sup>]: 3740.34  
MW: 3739.34  
Theoretical MW: 3739.63  
Match: Approved  
Z=1

Peptide LP18 = **KKKK**L**KK**IL**KK**L**FQ**FINQL**D**NQL**Q**D**I****KKKK**-NH<sub>2</sub>

**HPLC Certificate**

**HPLC Column** (250×4.6mm I.D.) C18  
**Detection wavelength** 220 nm  
**Gradient** 30-60%B in 30 min  
**Buffer A** 0.05%TFA +2%CH<sub>3</sub>CN  
**Buffer B** 0.05%TFA +90%CH<sub>3</sub>CN

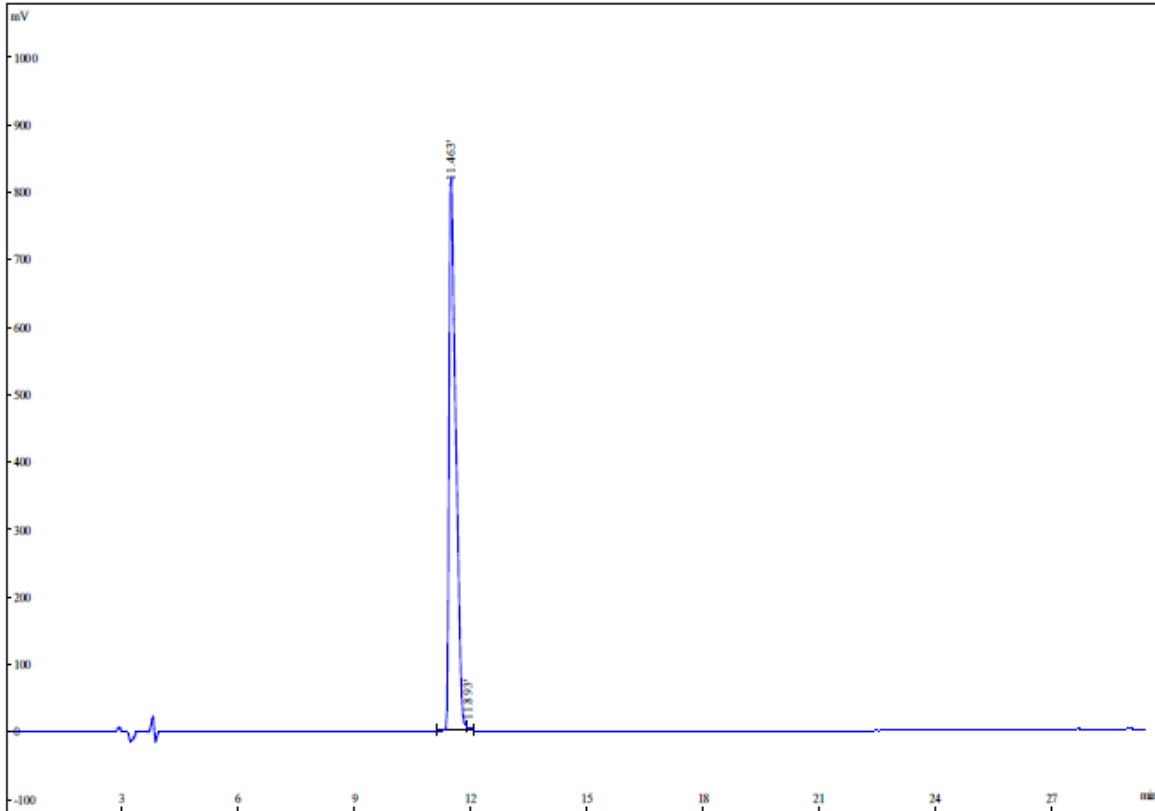

**Peak Results**

| Rank  | Time   | Conc. | Area    | Height |
|-------|--------|-------|---------|--------|
| 1     | 11.463 | 99.72 | 9898025 | 844758 |
| 2     | 11.893 | 0.281 | 27888   | 4755   |
| Total |        | 100   | 9925913 | 849513 |

## Mass Spectrometry Certificate

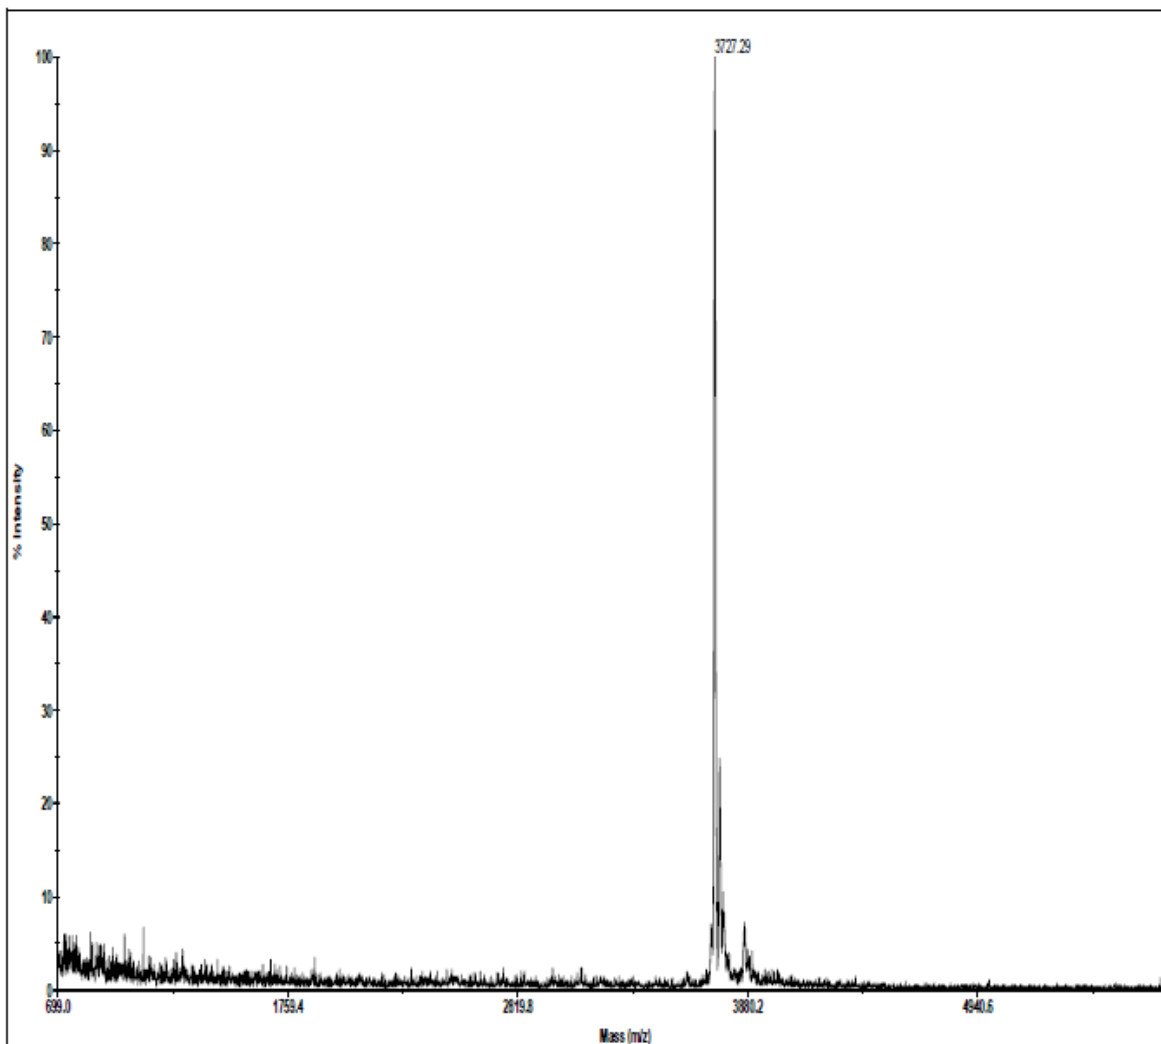

Lot No.: P300720-01-04

Method: MALDI-TOF

Main Peak: 3727.29

MW [M+H<sup>+</sup>]: 3727.29

MW: 3726.29

Theoretical MW: 3725.69

Match: Approved

Z=1



Peptide LP20 = **KKKK**L**KK**IL**KK**L**FQ**F**ID**QLIN**D**LQNI**KKKK**-NH<sub>2</sub>

**HPLC Certificate**

**HPLC Column** (250×4.6mm I.D.) C18  
**Detection wavelength** 220 nm  
**Gradient** 28-58%B in 30 min  
**Buffer A** 0.05%TFA +2%CH<sub>3</sub>CN  
**Buffer B** 0.05%TFA +90%CH<sub>3</sub>CN

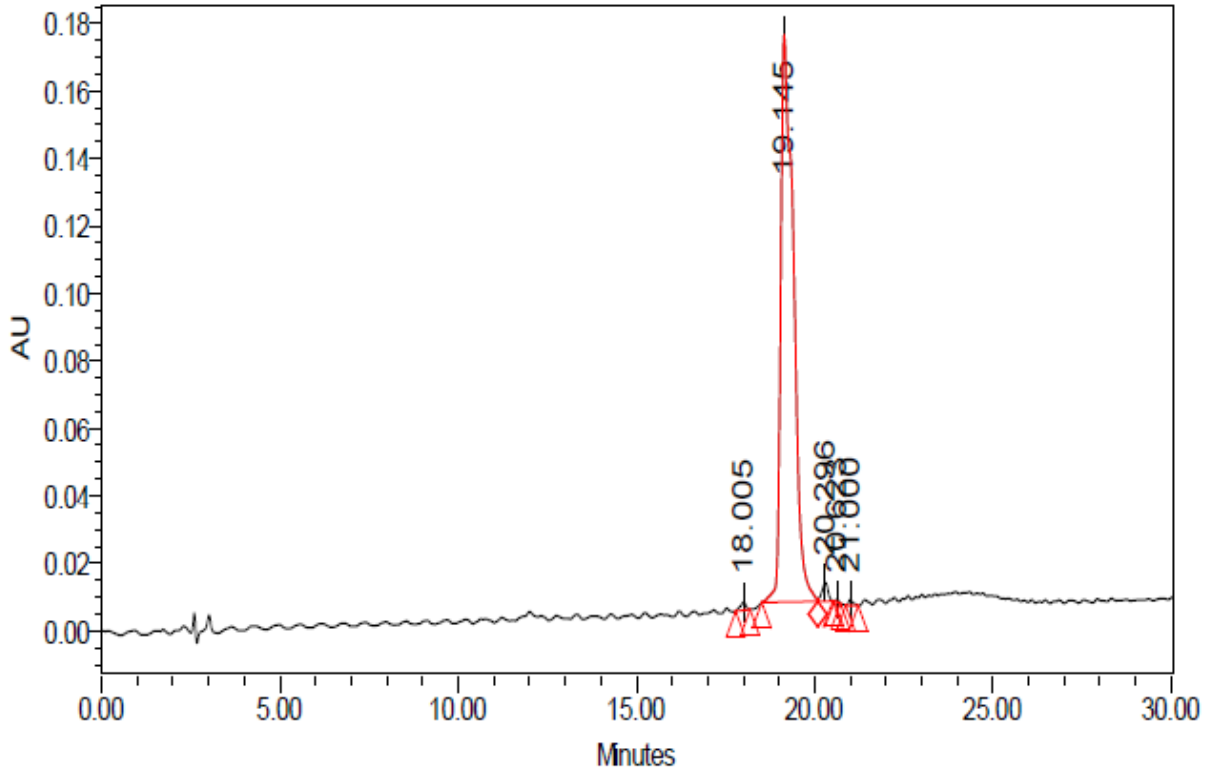

|   | Retention Time | Area    | % Area | Height |
|---|----------------|---------|--------|--------|
| 1 | 18.005         | 25976   | 0.61   | 2365   |
| 2 | 19.145         | 4181772 | 97.43  | 168064 |
| 3 | 20.296         | 64828   | 1.51   | 5563   |
| 4 | 20.623         | 4426    | 0.10   | 740    |
| 5 | 21.000         | 14874   | 0.35   | 1755   |

## Mass Spectrometry Certificate

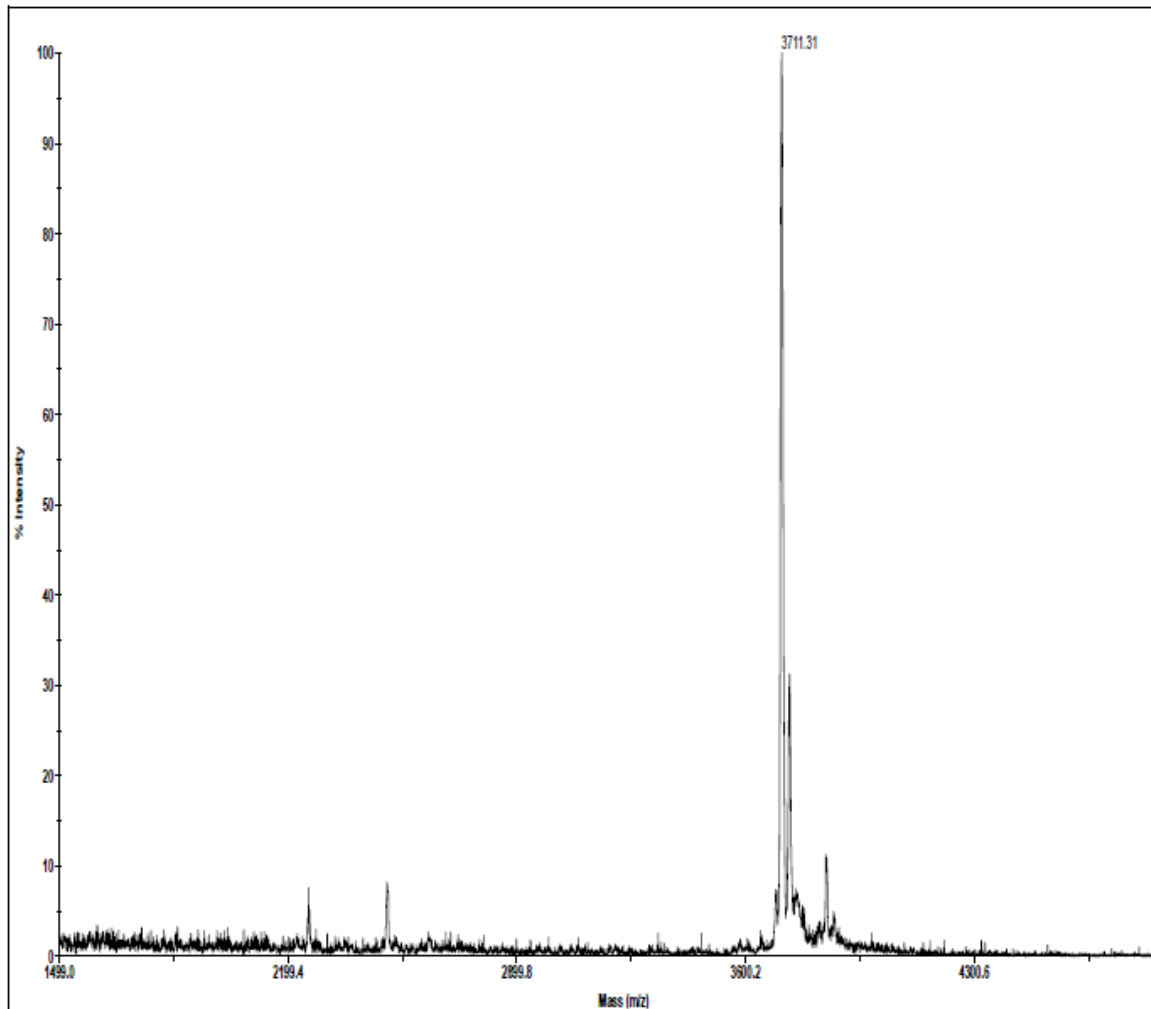

Lot No.: P300720-01-05  
Method: MALDI-TOF  
Main Peak: 3711.31  
MW [M+H<sup>+</sup>]: 3711.31  
MW: 3710.31  
Theoretical MW: 3710.72  
Match: Approved  
Z=1

Peptide LP22 = **K****K****K****L****K****K****I****L****K****K****L****F****Q****F****I****N****Q****L****D****N****Q****L****Q****D****I****K****Q****N****K**

**HPLC Certificate**

**HPLC Column** (250×4.6mm I.D.) C18  
**Detection wavelength** 220 nm  
**Gradient** 15-45%B in 30 min  
**Buffer A** 0.05%TFA +2%CH<sub>3</sub>CN  
**Buffer B** 0.05%TFA +90%CH<sub>3</sub>CN

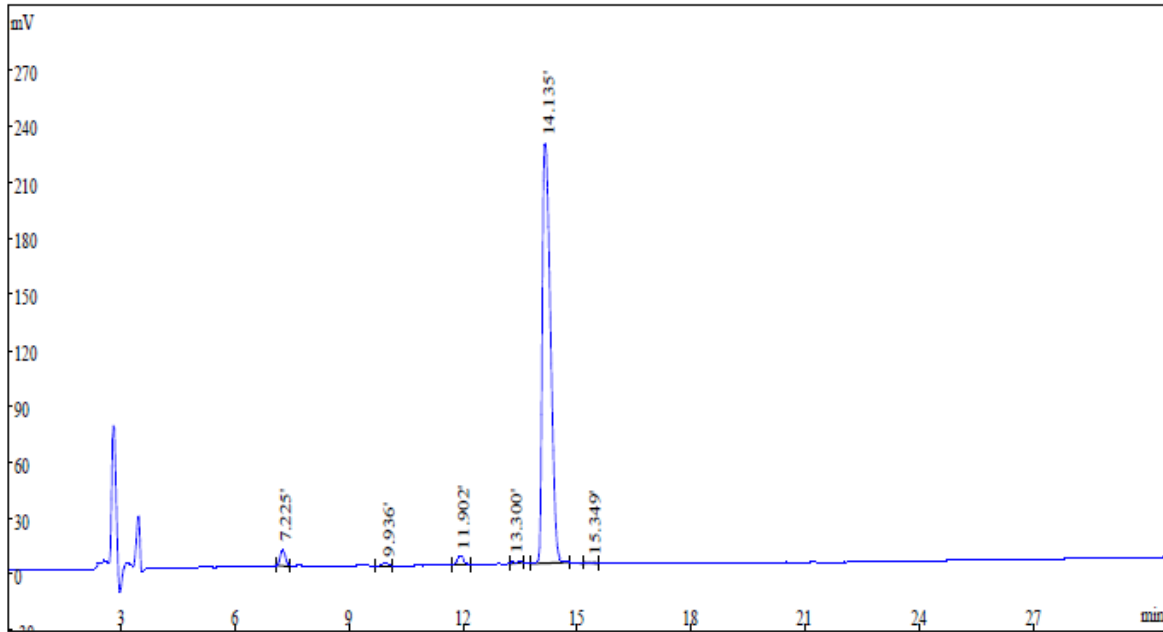

**Peak Results**

| Rank  | Time   | Conc.  | Area    | Height |
|-------|--------|--------|---------|--------|
| 1     | 7.225  | 2.139  | 67938   | 8225   |
| 2     | 9.936  | 0.3553 | 11285   | 1279   |
| 3     | 11.902 | 1.716  | 54493   | 4952   |
| 4     | 13.300 | 0.5271 | 16742   | 1240   |
| 5     | 14.135 | 95.06  | 3019533 | 223829 |
| 6     | 15.349 | 0.1988 | 6313    | 508    |
| Total |        | 100    | 3176304 | 240033 |

## Mass Spectrometry Certificate

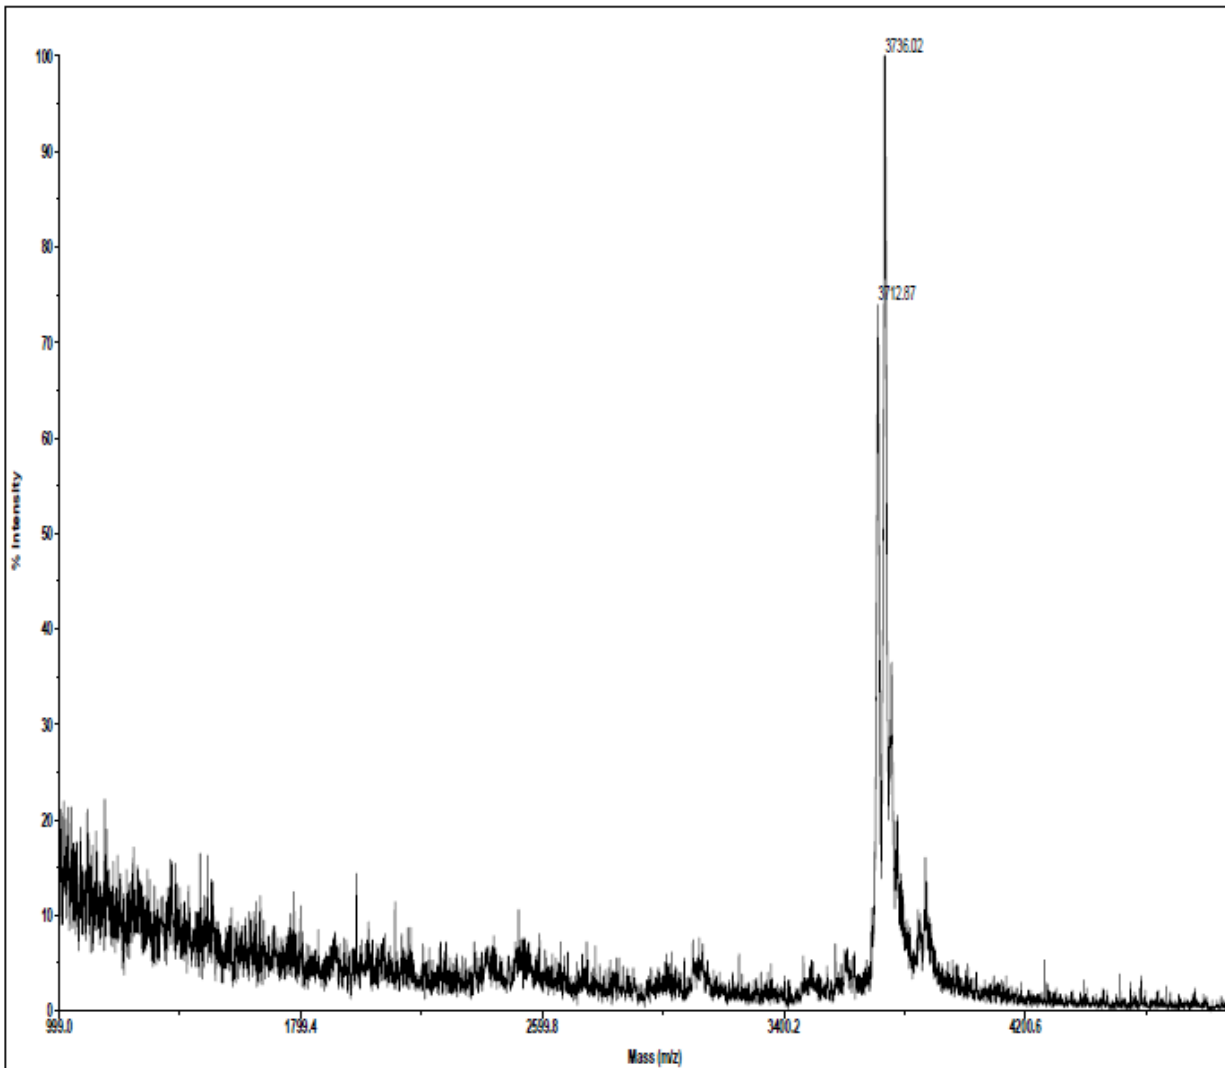

Lot No.: P300720-01-02  
Method: MALDI-TOF  
Main Peak: 3736.02  
MW [M+ Na<sup>+</sup>]: 3736.02  
MW: 3713.02  
Theoretical MW: 3712.56  
Match: Approved  
Z=1

Peptide LP23 = Ac-KKKKLLKKILKKL**FQF**INQL**D**NQL**QD**IK**QNK**-NH<sub>2</sub>

**HPLC Certificate**

HPLC Column (250×4.6mm I.D.) C18  
Detection wavelength 220 nm  
Gradient 32-62%B in 30 min  
Buffer A 0.05%TFA +2%CH<sub>3</sub>CN  
Buffer B 0.05%TFA +90%CH<sub>3</sub>CN

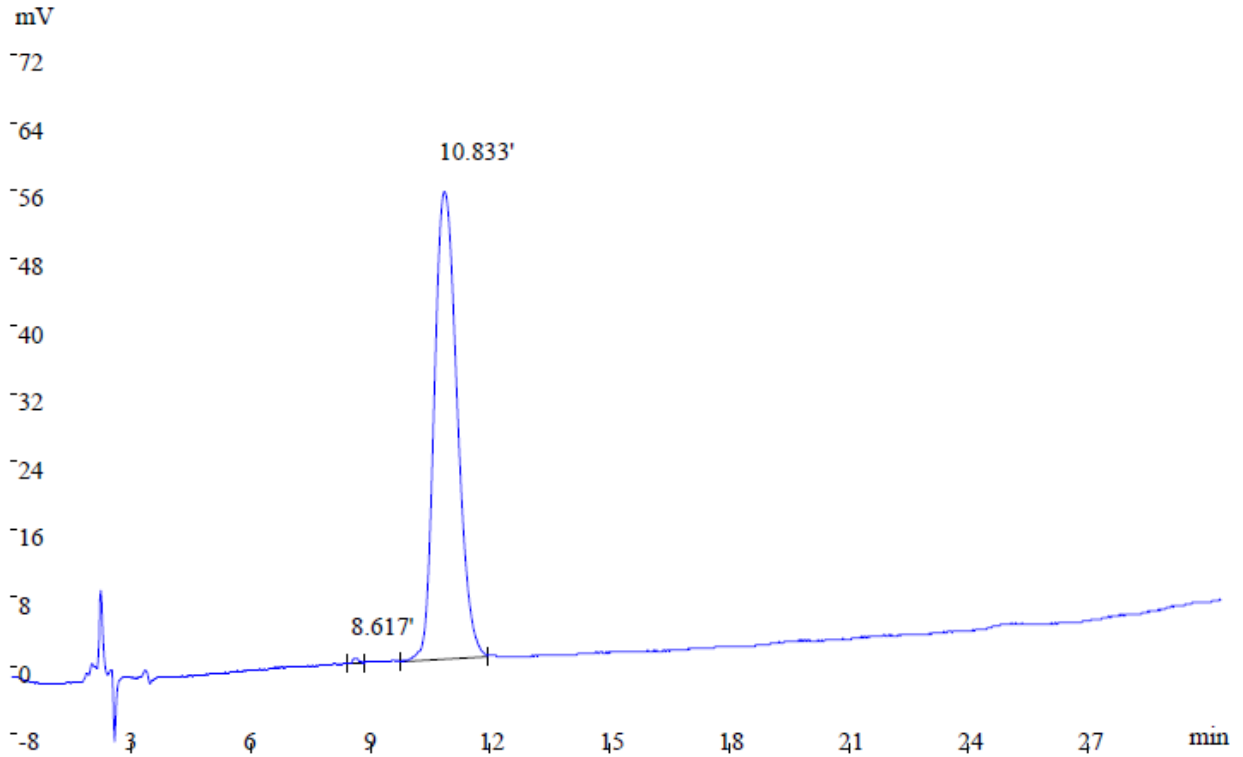

**Peak Results**

| Rank  | Time   | Conc.  | Area    | Height |
|-------|--------|--------|---------|--------|
| 1     | 8.617  | 0.2548 | 5400    | 707    |
| 2     | 10.833 | 99.75  | 2113573 | 54859  |
| Total |        | 100    | 2118973 | 55566  |

## Mass Spectrometry Certificate

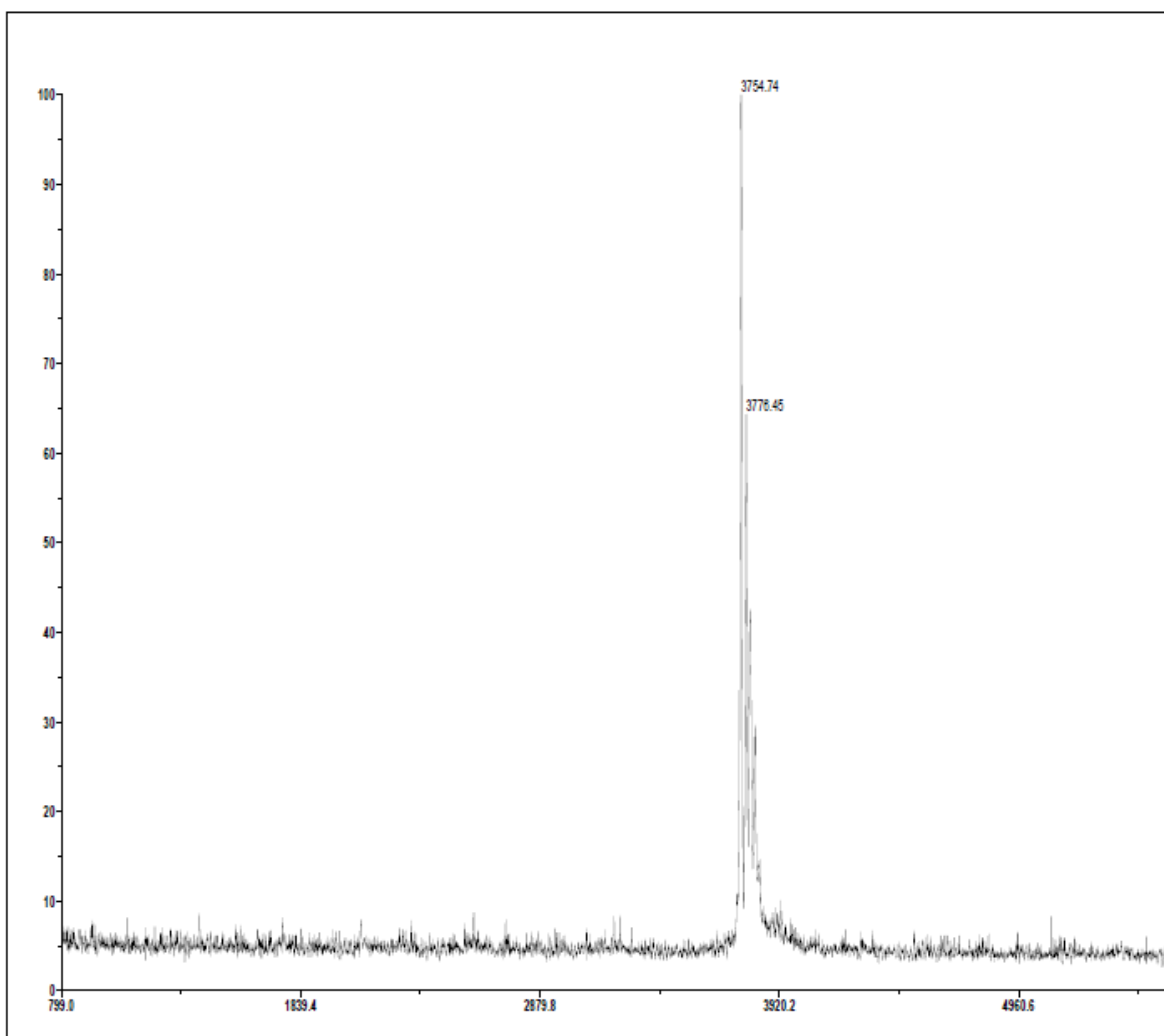

Lot No.: P061021-02-05

Method: MALDI-TOF

Main Peak: 3754.74

MW [M+H<sup>+</sup>]: 3754.74

MW: 3753.74

Theoretical MW: 3753.61

Match: Approved

Z=1

Peptide LP26 = **K****K****K****L****K****K****I****L****K****K****L****F****Q****F****I****N****Q****L****D****N****Q****L****Q****D****F****K****Q****N****K**

**HPLC Certificate**

HPLC Column (250×4.6mm I.D.) C18  
 Detection wavelength 220 nm  
 Gradient 15-45%B in 30 min  
 Buffer A 0.05%TFA +2%CH<sub>3</sub>CN  
 Buffer B 0.05%TFA +90%CH<sub>3</sub>CN

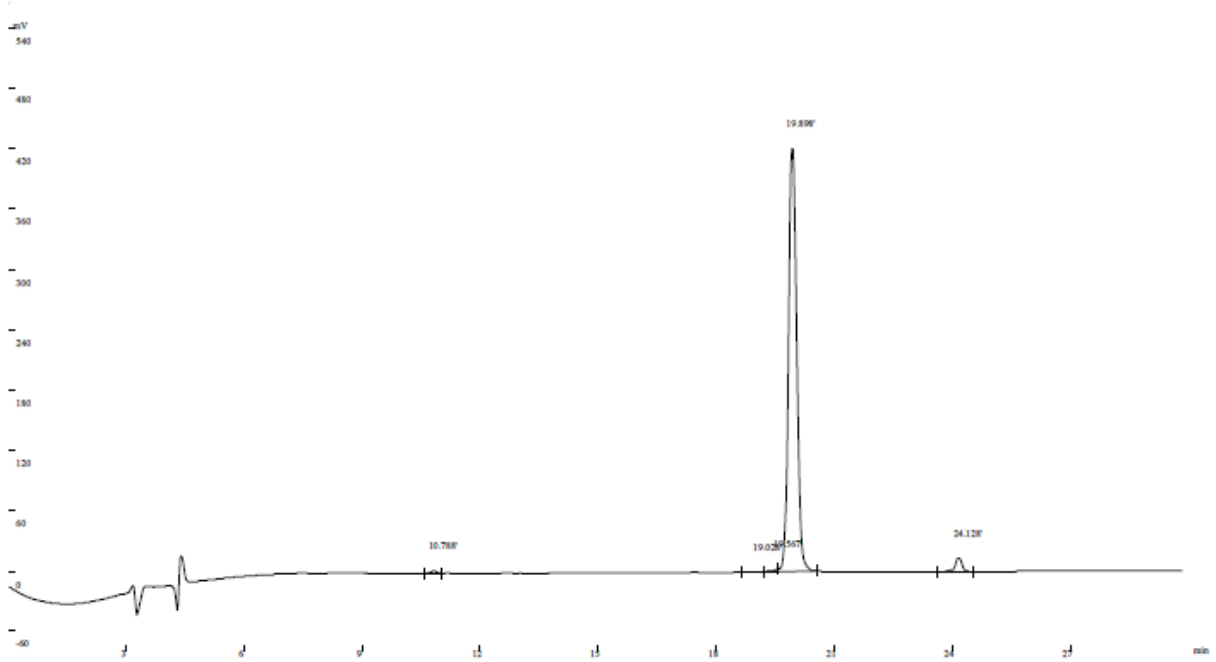

**Peak Results**

| Rank         | Time   | Quantity   | Area           | Height        |
|--------------|--------|------------|----------------|---------------|
| 1            | 10.788 | 0.3634     | 20656          | 2173          |
| 2            | 19.028 | 0.04833    | 2747           | 392           |
| 3            | 19.567 | 0.4885     | 27764          | 3042          |
| 4            | 19.898 | 96.63      | 5491806        | 420109        |
| 5            | 24.128 | 2.474      | 140617         | 13378         |
| <b>Total</b> |        | <b>100</b> | <b>5683590</b> | <b>439094</b> |

## Mass Spectrometry Certificate

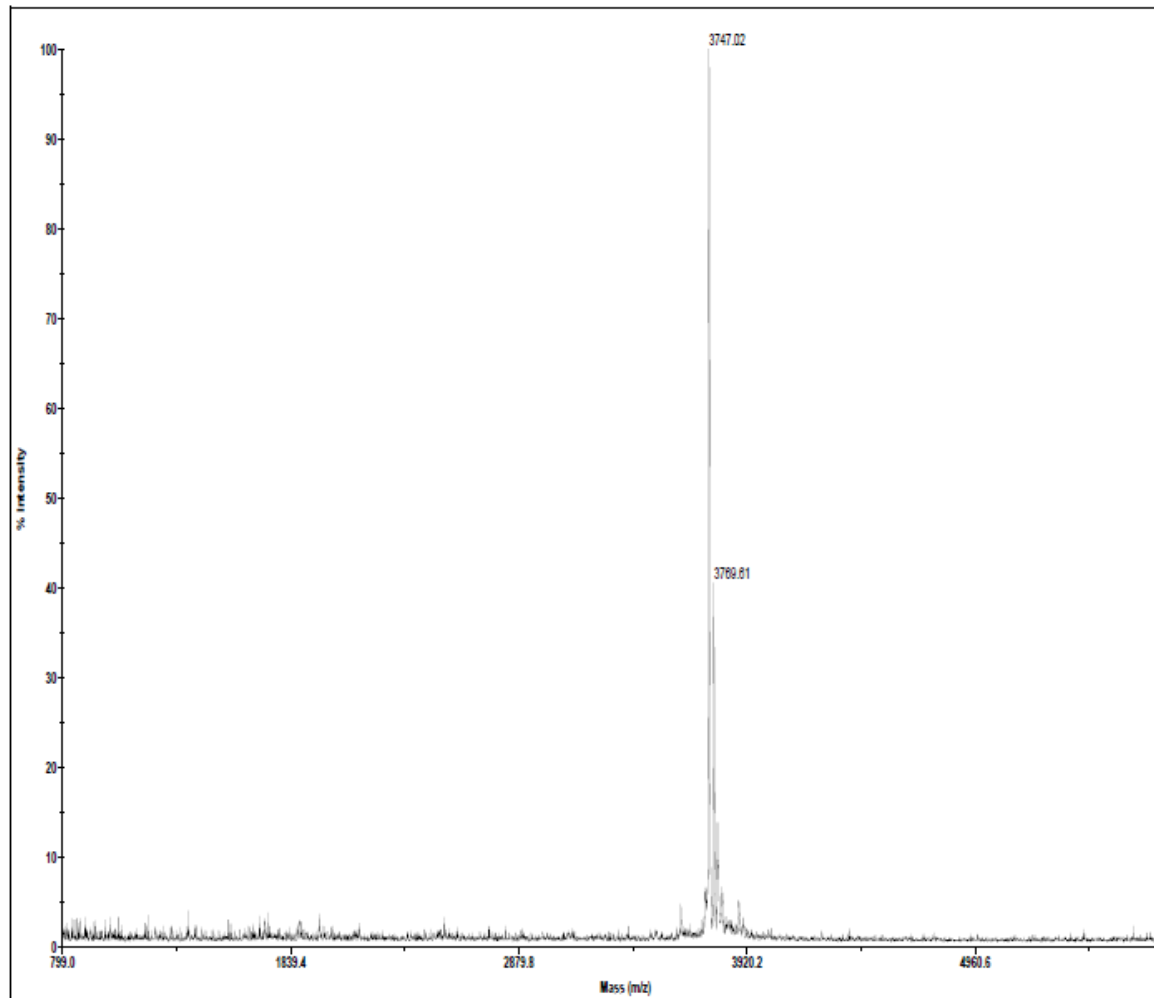

Lot No.: P071220-01-11  
Method: MALDI-TOF  
Main Peak: 3747.02  
MW [M+H<sup>+</sup>]: 3747.02  
MW: 3746.02  
Theoretical MW: 3746.58  
Match: Approved  
Z=1



Peptide LP28 = **KKKKK**L**KK**I**L****KK**L**FQ**F**I**N**QL****D**N**QL****Q****D**I**KKKKK**

**HPLC Certificate**

HPLC Column (250×4.6mm ID.) C18  
Detection wavelength 220 nm  
Gradient 20-50%B in 30 min  
Buffer A 0.05%TFA +2%CH<sub>3</sub>CN  
Buffer B 0.05%TFA +90%CH<sub>3</sub>CN

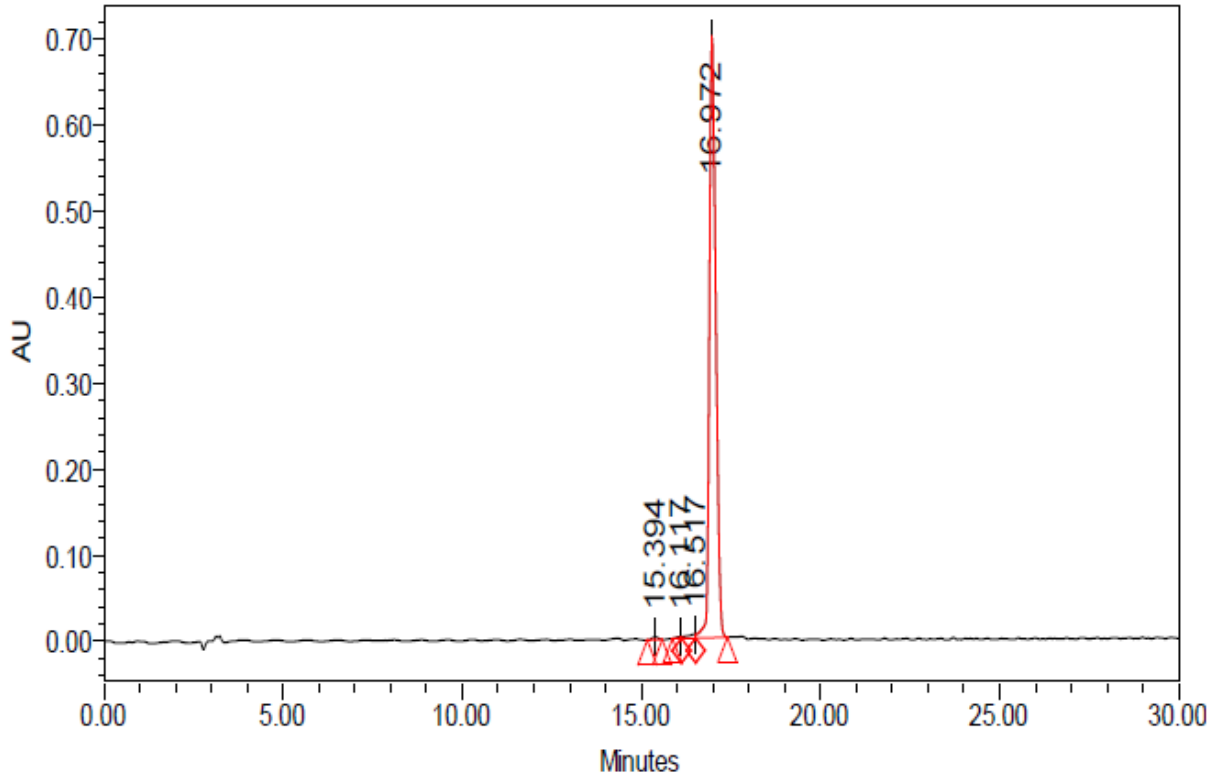

|   | Retention Time | Area    | % Area | Height |
|---|----------------|---------|--------|--------|
| 1 | 15.394         | 36389   | 0.41   | 3069   |
| 2 | 16.117         | 15557   | 0.18   | 1673   |
| 3 | 16.517         | 71712   | 0.81   | 4311   |
| 4 | 16.972         | 8695304 | 98.60  | 700056 |

## Mass Spectrometry Certificate

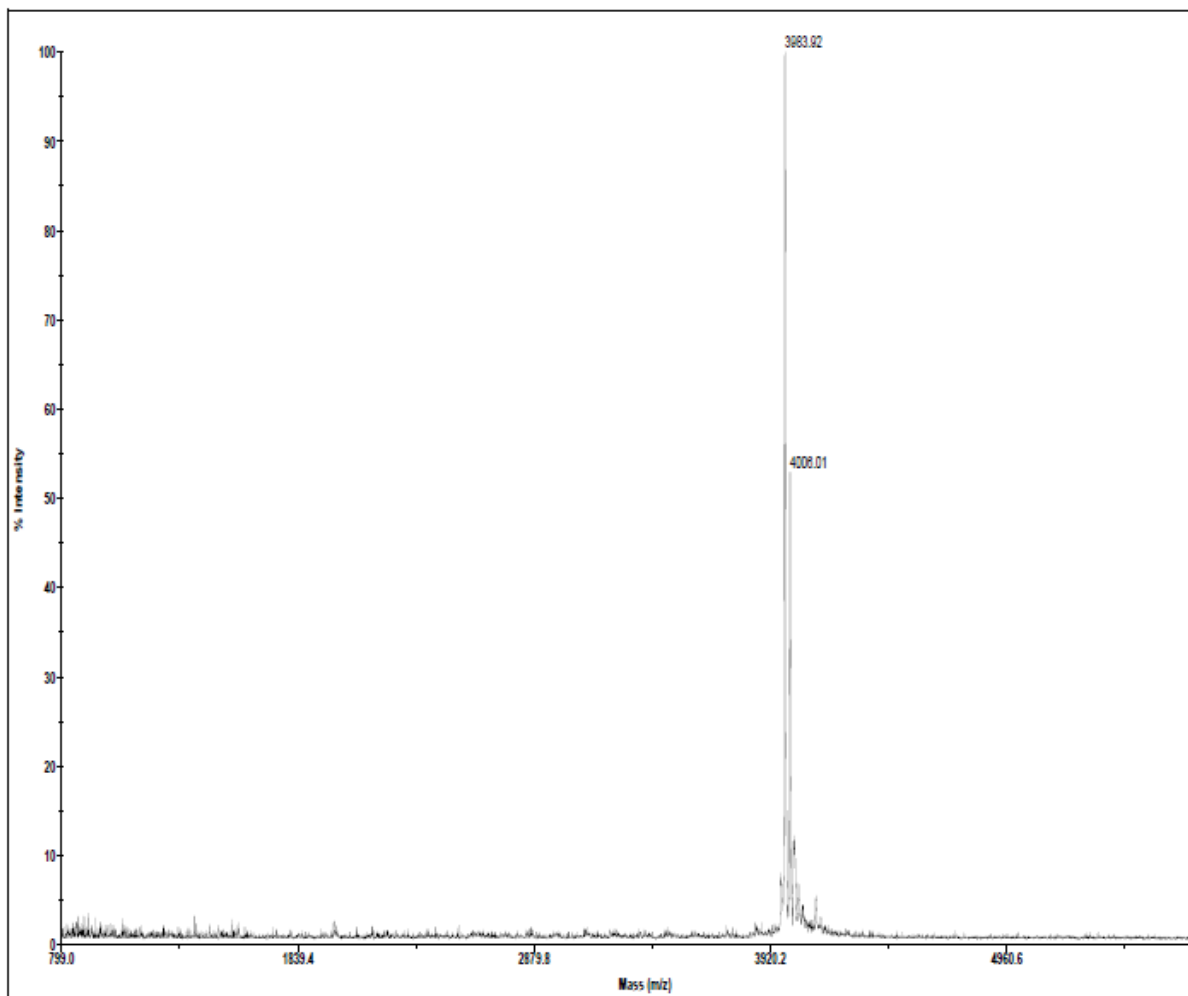

Lot No.: P071220-01-12  
Method: MALDI-TOF  
Main Peak: 3983.92  
MW [M+H<sup>+</sup>]: 3983.92  
MW: 3982.92  
Theoretical MW: 3983.03  
Match: Approved  
Z=1

Peptide LP29 = **K****K****K****K****A****K****K****A****K****K****A****F****Q****F****A****N****Q****A****D****N****Q****A****Q****D****A****K****Q****N****K**-NH<sub>2</sub>

**HPLC Certificate**

HPLC Column (250×4.6mm I.D.) C18  
 Detection wavelength 220 nm  
 Gradient 0-30%B in 30 min  
 Buffer A 0.05%TFA +2%CH<sub>3</sub>CN  
 Buffer B 0.05%TFA +90%CH<sub>3</sub>CN

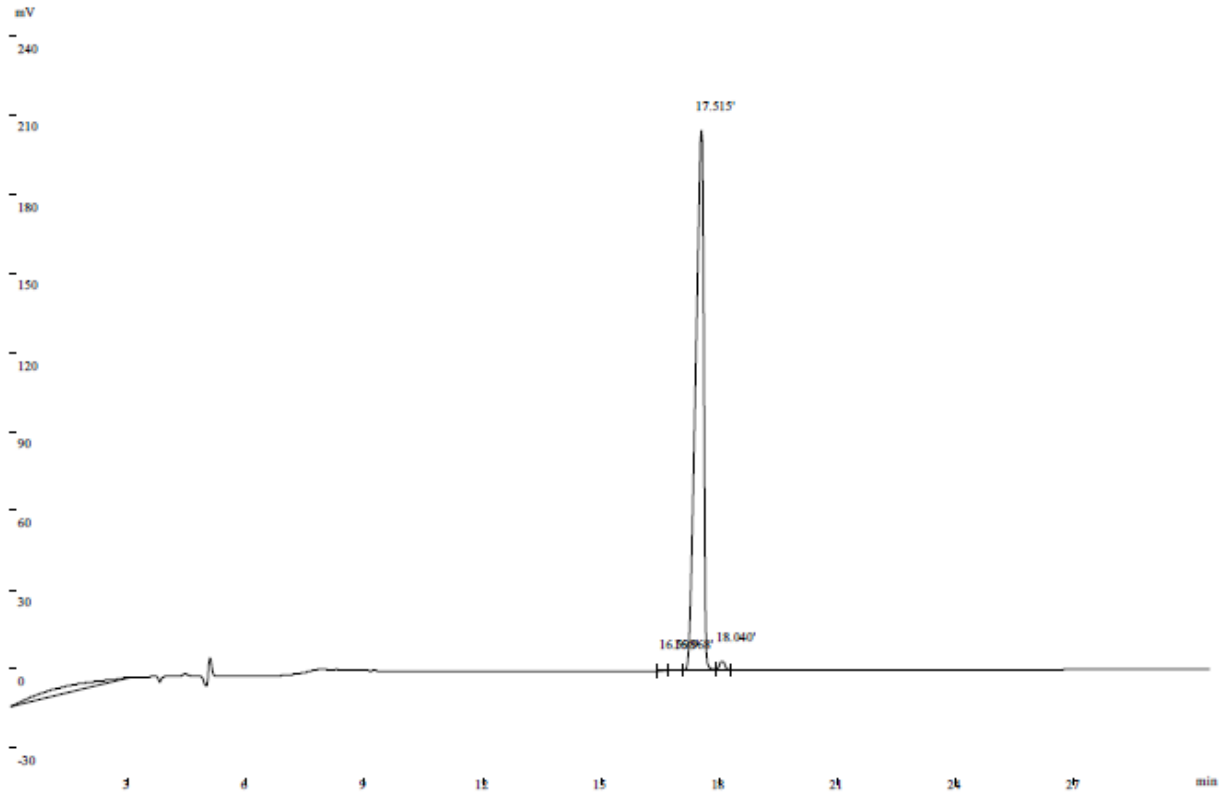

**Peak Results**

| Rank  | Time   | Quantity | Area    | Height |
|-------|--------|----------|---------|--------|
| 1     | 16.598 | 0.1139   | 3026    | 306    |
| 2     | 16.968 | 0.1953   | 5188    | 317    |
| 3     | 17.515 | 98.66    | 2620577 | 204732 |
| 4     | 18.040 | 1.032    | 27420   | 3387   |
| Total |        | 100      | 2656211 | 208742 |

## Mass Spectrometry Certificate

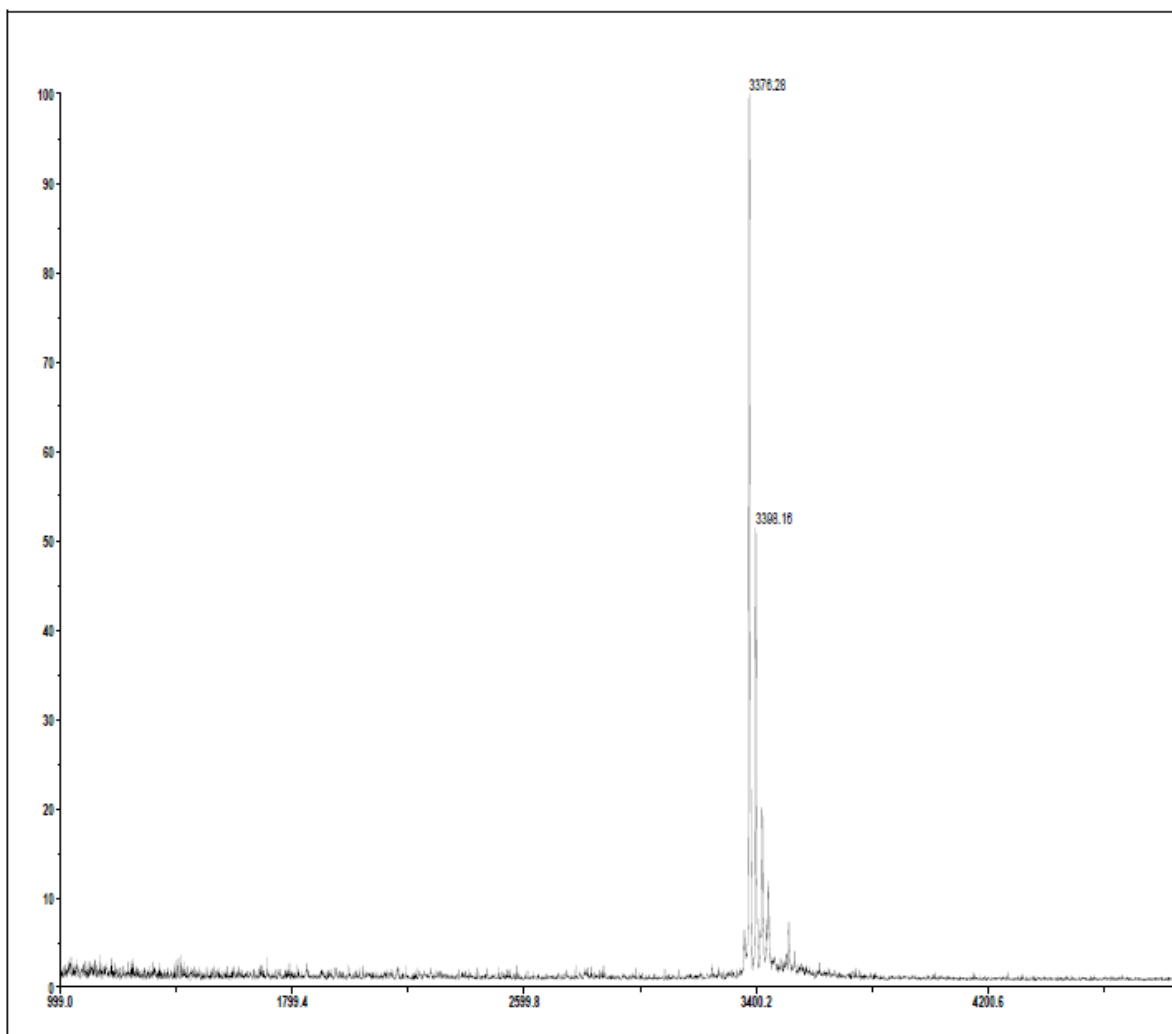

Lot No.: P170521-01-03  
Method: MALDI-TOF  
Main Peak: 3376.28  
MW [M+H<sup>+</sup>]: 3376.28  
MW: 3375.28  
Theoretical MW: 3374.93  
Match: Approved  
Z=1

Peptide LP30 = **K****K****K****K****M****K****K****M****M****K****K****M****F****Q****F****M****N****Q****M****D****N****Q****M****Q****D****M****K****Q****N****K**-NH<sub>2</sub>

**HPLC Certificate**

HPLC Column (250×4.6mm I.D.) C18  
 Detection wavelength 220 nm  
 Gradient 18-48%B in 30 min  
 Buffer A 0.05%TFA +2%CH<sub>3</sub>CN  
 Buffer B 0.05%TFA +90%CH<sub>3</sub>CN

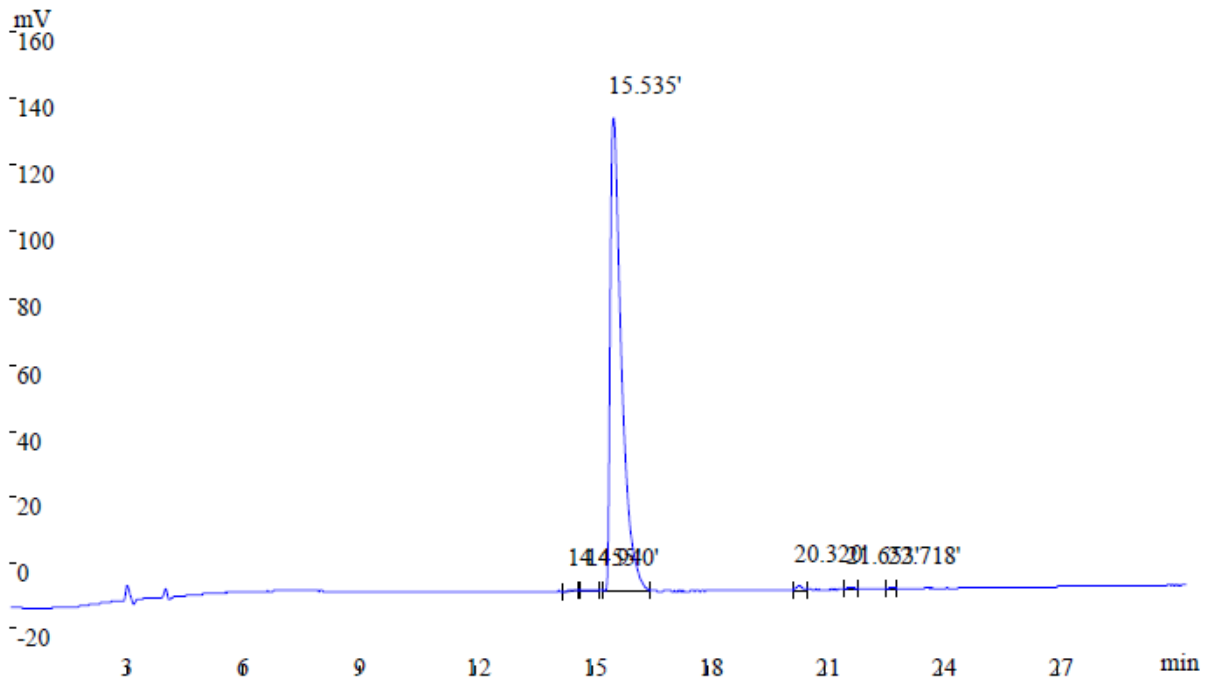

**Peak Results**

| Rank         | Time   | Conc.      | Area           | Height        |
|--------------|--------|------------|----------------|---------------|
| 1            | 14.455 | 0.08827    | 2398           | 319           |
| 2            | 14.940 | 0.07097    | 1928           | 290           |
| 3            | 15.535 | 99.11      | 2692266        | 142301        |
| 4            | 20.320 | 0.4043     | 10984          | 1235          |
| 5            | 21.653 | 0.2333     | 6338           | 700           |
| 6            | 22.718 | 0.09402    | 2554           | 365           |
| <b>Total</b> |        | <b>100</b> | <b>2716468</b> | <b>145210</b> |

## Mass Spectrometry Certificate

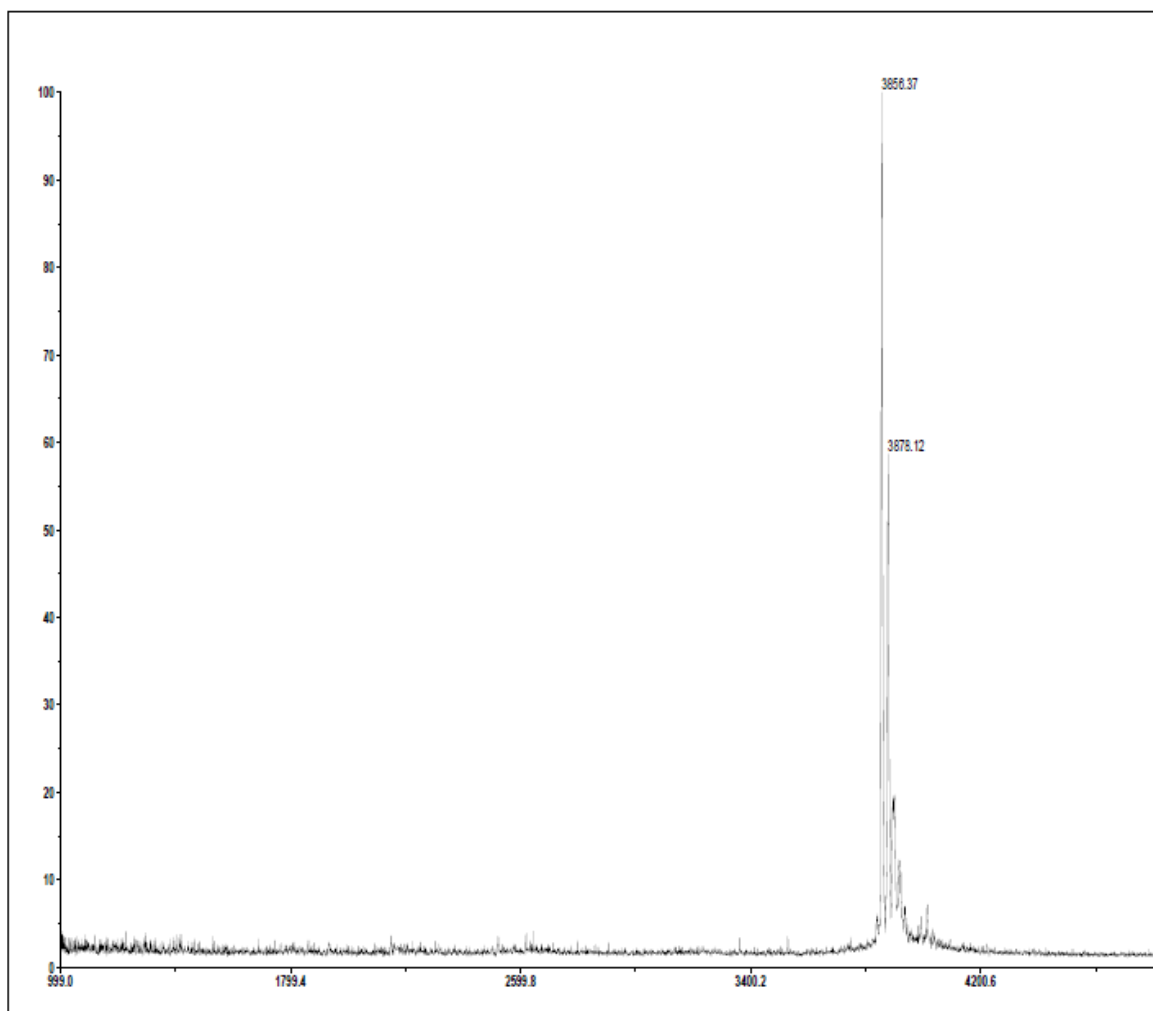

Lot No.: P170521-01-05

Method: MALDI-TOF

Main Peak: 3856.37

MW [M+H<sup>+</sup>]: 3856.37

MW: 3855.37

Theoretical MW: 3855.87

Match: Approved

Z=1

Peptide LP31 = **K****K****K****K****V****K****K****V****V****K****K****V****F****Q****F****V****N****Q****V****D****N****Q****V****Q****D****V****K****Q****N****K**-NH<sub>2</sub>

**HPLC Certificate**

HPLC Column (250×4.6mm I.D.) C18  
 Detection wavelength 220 nm  
 Gradient 12-42%B in 30 min  
 Buffer A 0.05%TFA +2%CH<sub>3</sub>CN  
 Buffer B 0.05%TFA +90%CH<sub>3</sub>CN

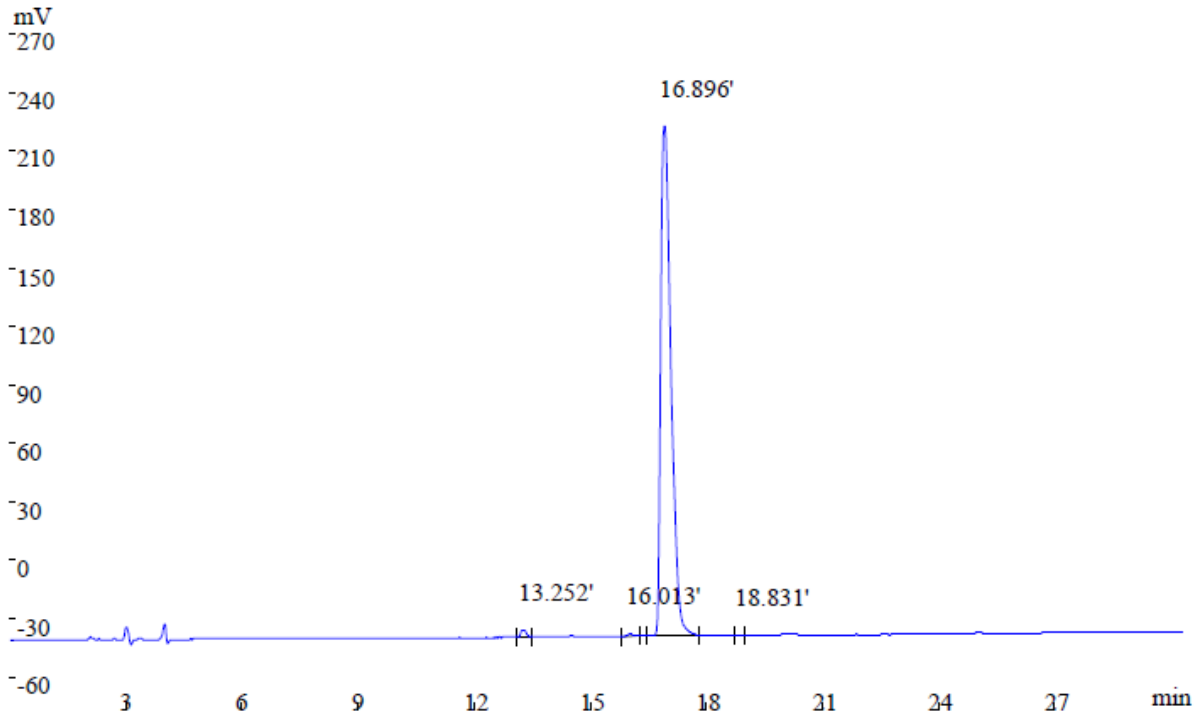

Peak Results

| Rank  | Time   | Conc.   | Area    | Height |
|-------|--------|---------|---------|--------|
| 1     | 13.252 | 0.7556  | 34224   | 3856   |
| 2     | 16.013 | 0.3018  | 13669   | 1077   |
| 3     | 16.896 | 98.86   | 4477414 | 260958 |
| 4     | 18.831 | 0.08723 | 3951    | 490    |
| Total |        | 100     | 4529258 | 266381 |

## Mass Spectrometry Certificate

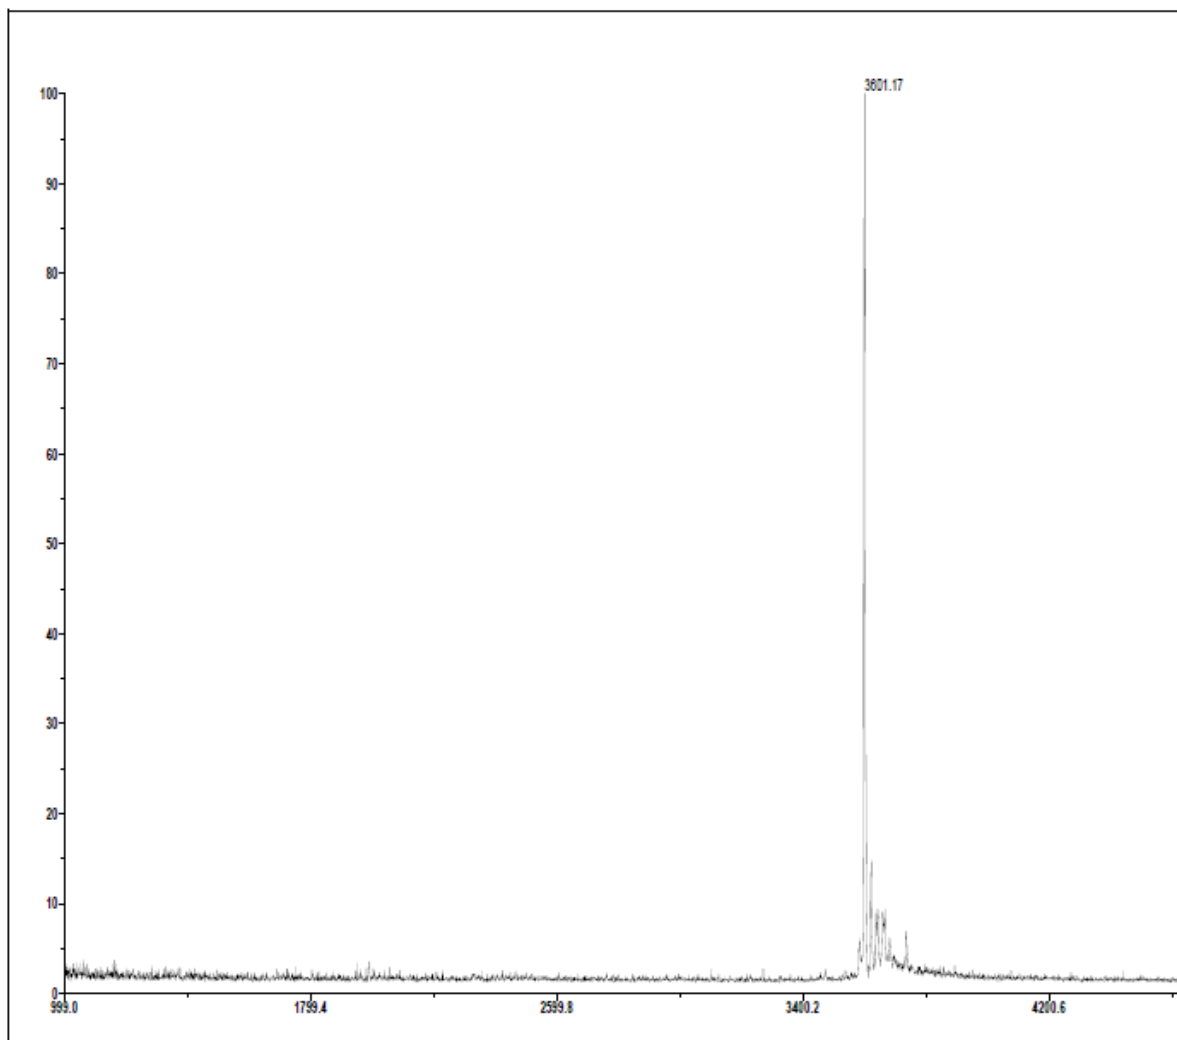

Lot No.: P170521-01-04

Method: MALDI-TOF

Main Peak: 3601.17

MW [M+H<sup>+</sup>]: 3601.17

MW: 3600.17

Theoretical MW: 3599.36

Match: Approved

Z=1



Peptide LP32 = **KKKK**L**KKLL****KKL****FQ****F**LNQL**D**NQL**Q****D**L**K**Q**N****K**-NH<sub>2</sub>

**HPLC Certificate**

HPLC Column (250×4.6mm I.D.) C18  
 Detection wavelength 220 nm  
 Gradient 20-50%B in 30 min  
 Buffer A 0.05%TFA +2%CH<sub>3</sub>CN  
 Buffer B 0.05%TFA +90%CH<sub>3</sub>CN

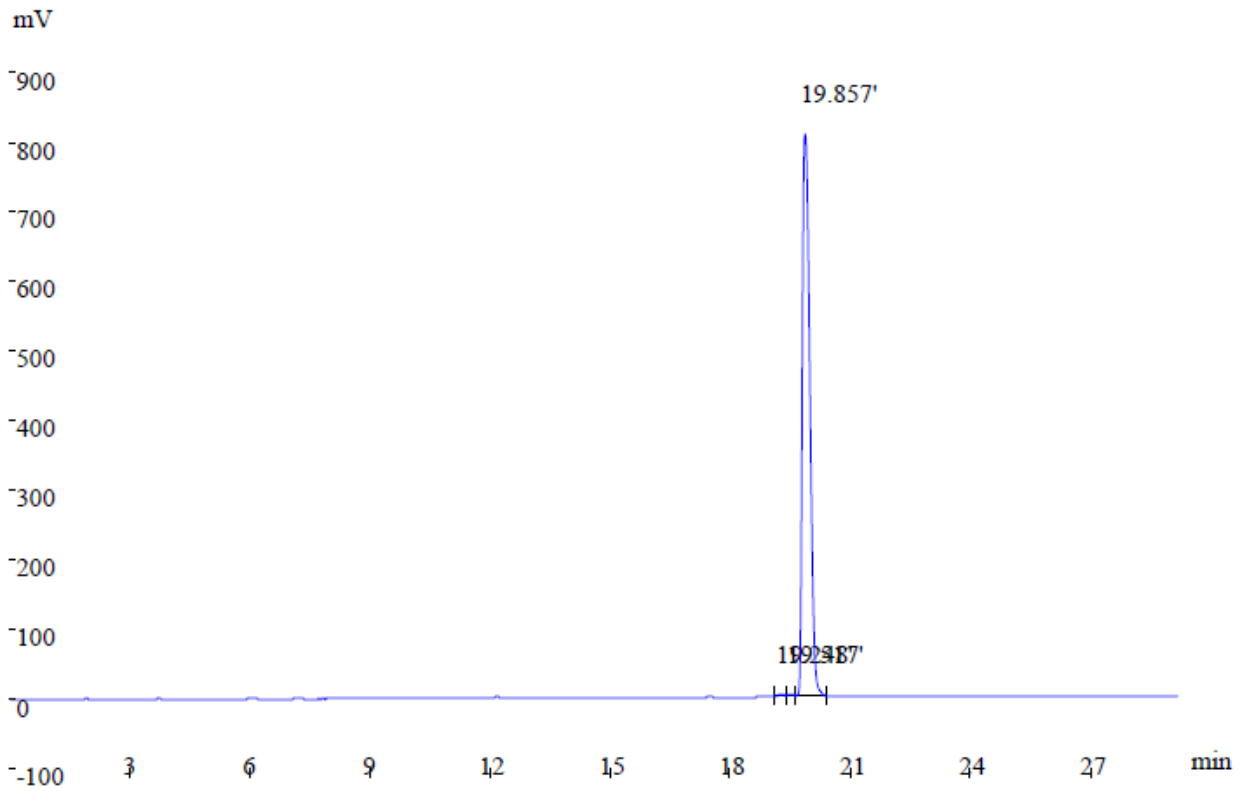

**Peak Results**

| Rank         | Time   | Conc.      | Area           | Height        |
|--------------|--------|------------|----------------|---------------|
| 1            | 19.248 | 0.1937     | 18484          | 1685          |
| 2            | 19.517 | 0.2373     | 22644          | 2596          |
| 3            | 19.857 | 99.57      | 9502838        | 807162        |
| <b>Total</b> |        | <b>100</b> | <b>9543966</b> | <b>811443</b> |

## Mass Spectrometry Certificate

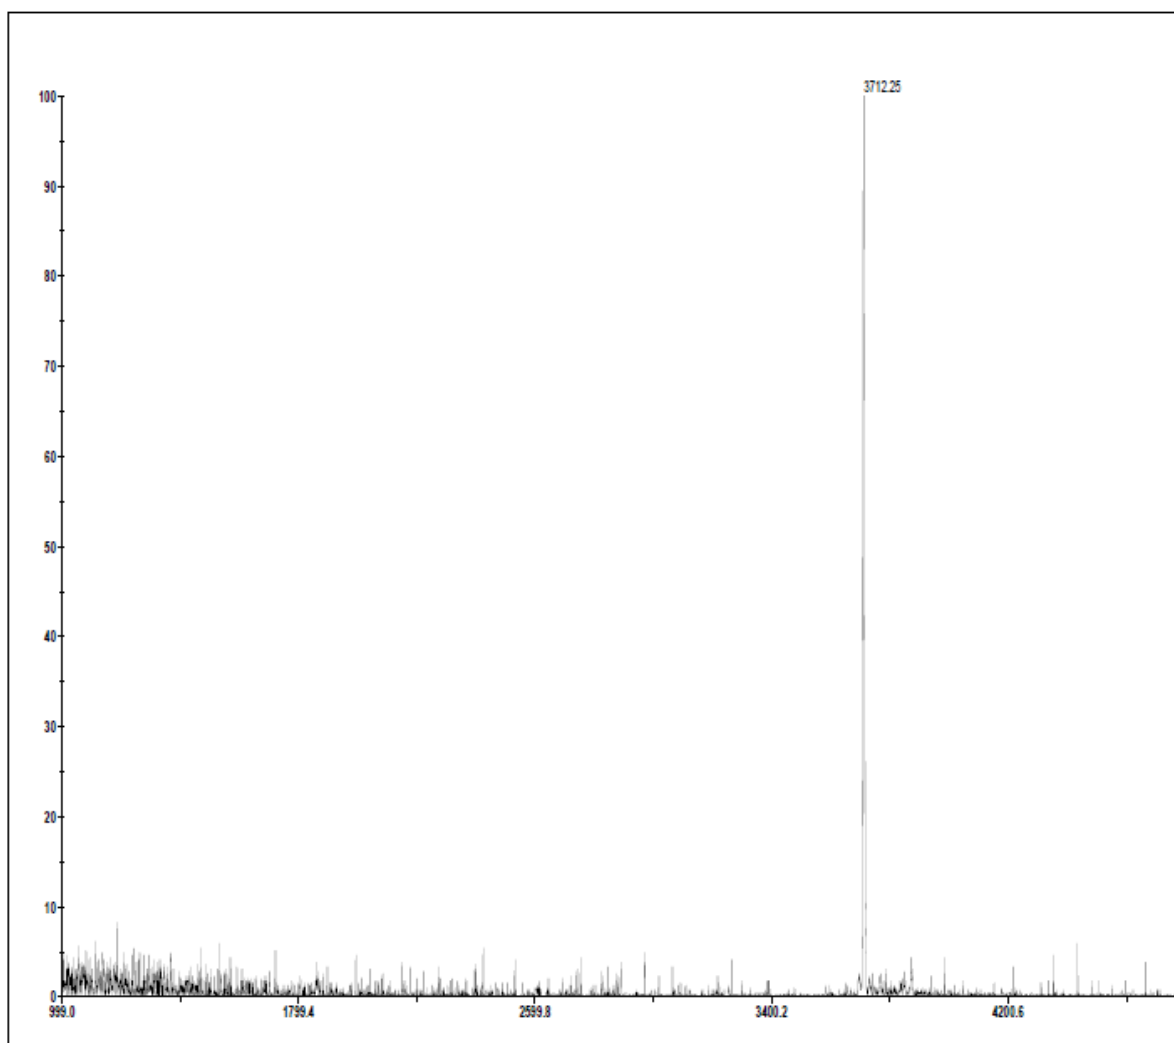

Lot No.: P170521-01-07  
Method: MALDI-TOF  
Main Peak: 3712.25  
MW [M+H<sup>+</sup>]: 3712.25  
MW: 3711.25  
Theoretical MW: 3711.58  
Match: Approved  
Z=1

Peptide LP33 = **K****K****K****K**I**K****K**I**I****K****K**I**F****Q****F**I**N****Q**I**D****N****Q**I**Q****D**I**K****Q****N****K**-NH<sub>2</sub>

**HPLC Certificate**

HPLC Column (250×4.6mm I.D.) C18  
Detection wavelength 220 nm  
Gradient 25-55%B in 30 min  
Buffer A 0.05%TFA +2%CH<sub>3</sub>CN  
Buffer B 0.05%TFA +90%CH<sub>3</sub>CN

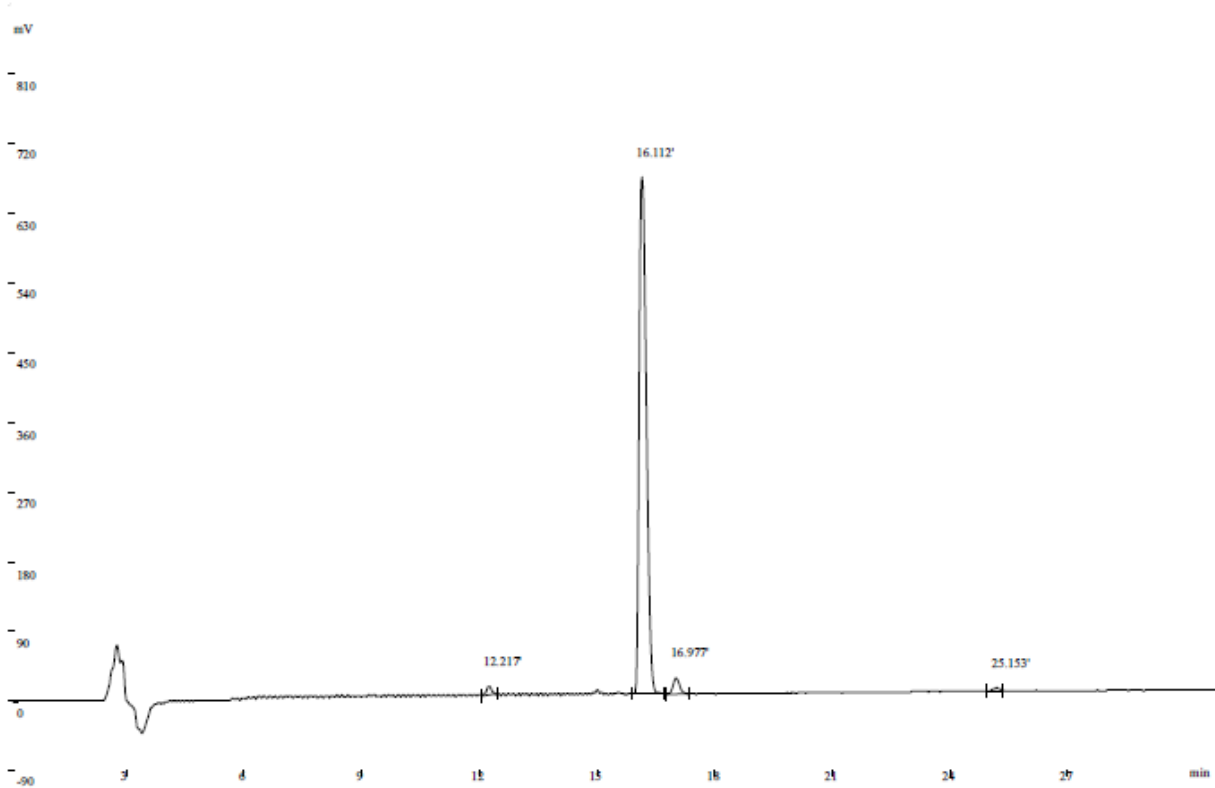

**Peak Results**

| Rank  | Time   | Quantity | Area    | Height |
|-------|--------|----------|---------|--------|
| 1     | 12.217 | 1.009    | 79496   | 11083  |
| 2     | 16.112 | 95.97    | 7557696 | 665694 |
| 3     | 16.977 | 2.502    | 197023  | 20544  |
| 4     | 25.153 | 0.5177   | 40772   | 3664   |
| Total |        | 100      | 7874987 | 700985 |

## Mass Spectrometry Certificate

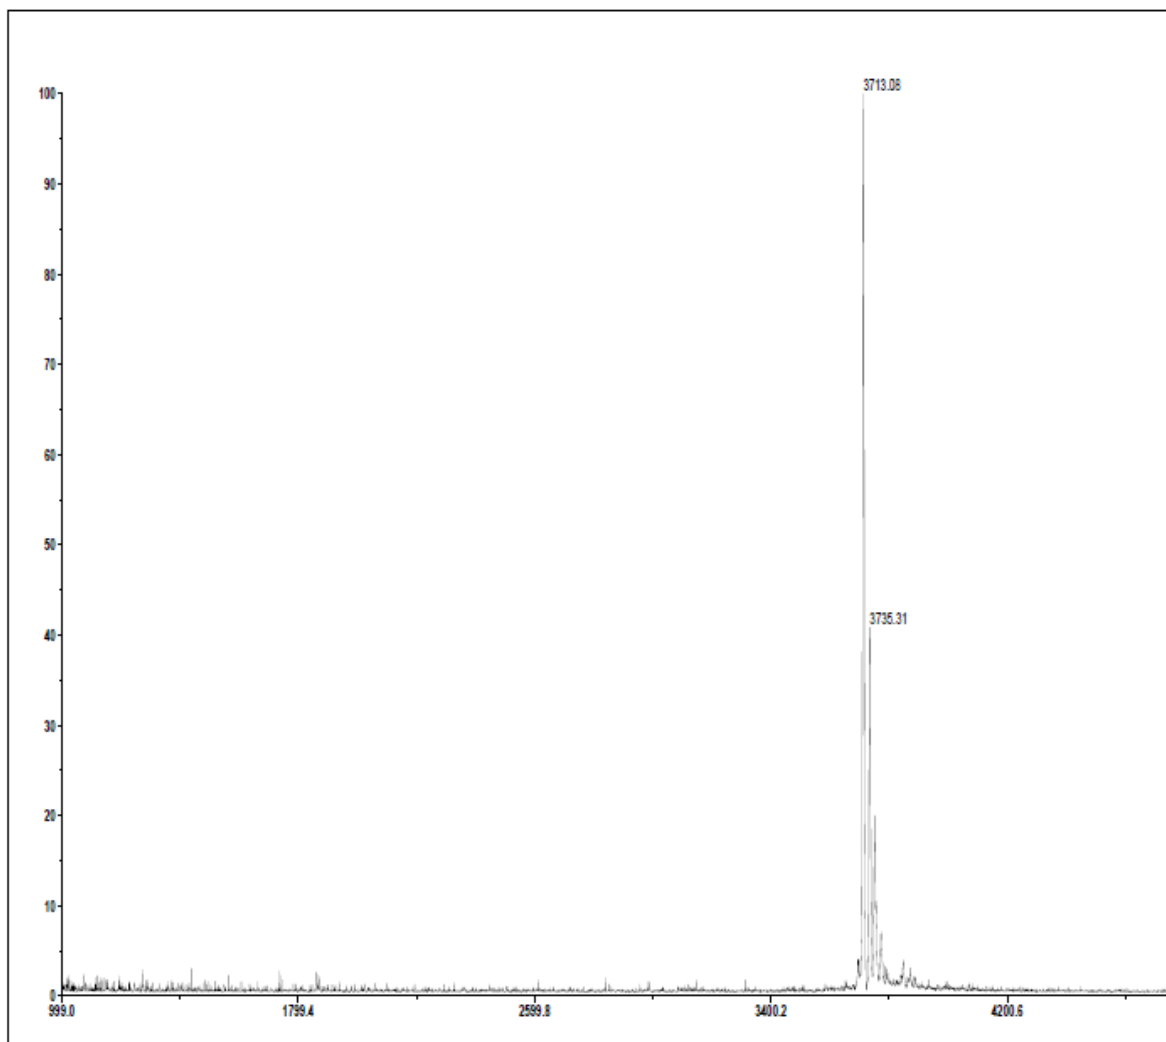

Lot No.: P170521-01-06

Method: MALDI-TOF

Main Peak: 3713.08

MW [M+H<sup>+</sup>]: 3713.08

MW: 3712.08

Theoretical MW: 3711.58

Match: Approved

Z=1

Peptide LP34 = **K****K****K****K**L**K****K**I**L****K****K**L**F****T****F**I**T**T**L****D**T**T**L**T****D**I**K**T**T****K**-NH<sub>2</sub>

**HPLC Certificate**

Lot No. P170521-01-08  
 HPLC Column (250×4.6mm I.D.) C18  
 Detection wavelength 220 nm  
 Gradient 28-58%B in 30 min  
 Buffer A 0.05%TFA +2%CH<sub>3</sub>CN  
 Buffer B 0.05%TFA +90%CH<sub>3</sub>CN

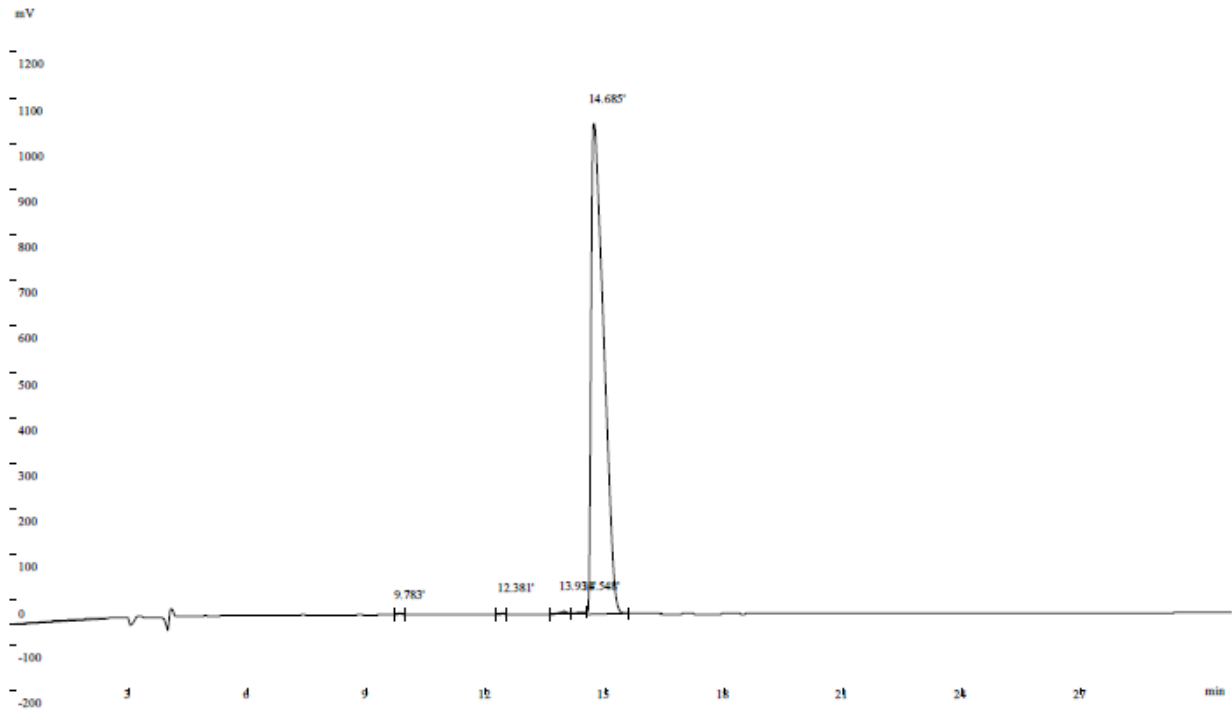

**Peak Results**

| Rank         | Time   | Quantity   | Area            | Height         |
|--------------|--------|------------|-----------------|----------------|
| 1            | 9.783  | 0.07631    | 16802           | 2228           |
| 2            | 12.381 | 0.04537    | 9990            | 1415           |
| 3            | 13.931 | 0.3482     | 76675           | 5647           |
| 4            | 14.548 | 0.3739     | 82326           | 6588           |
| 5            | 14.685 | 99.16      | 21831341        | 1072853        |
| <b>Total</b> |        | <b>100</b> | <b>22017134</b> | <b>1088731</b> |

## Mass Spectrometry Certificate

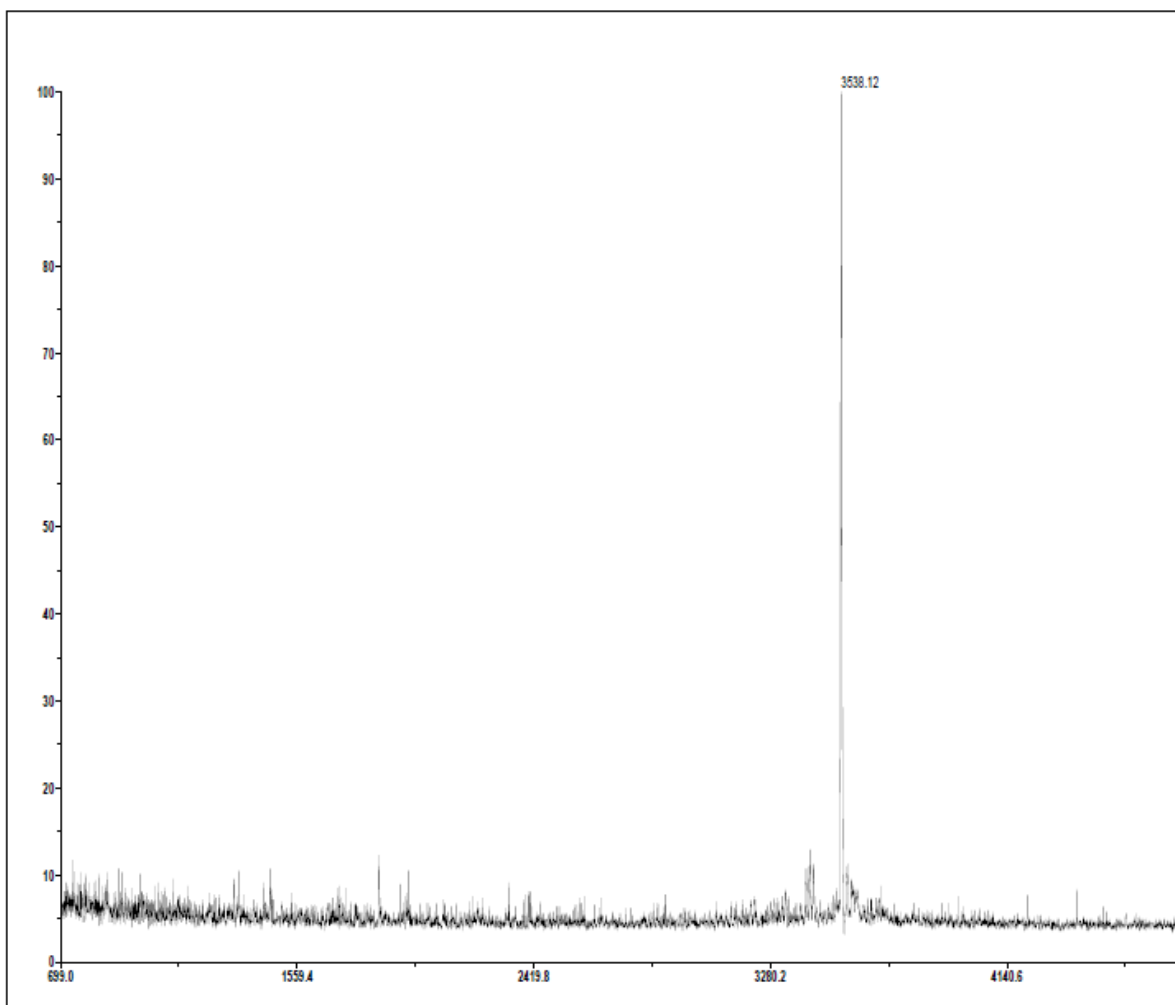

Lot No.: P170521-01-08

Method: MALDI-TOF

Main Peak: 3538.12

MW [M+H<sup>+</sup>]: 3538.12

MW: 3537.12

Theoretical MW: 3537.45

Match: Approved

Z=1

Peptide LP35 = **K****K****K****K**L**K****K**I**L****K****K**L**F****Q****F**I**Q****Q**L**D****Q****Q**L**Q****D**I**K****Q****Q****K**-NH<sub>2</sub>

**HPLC Certificate**

HPLC Column (250×4.6mm I.D.) C18  
 Detection wavelength 220 nm  
 Gradient 20-50%B in 30 min  
 Buffer A 0.05%TFA +2%CH<sub>3</sub>CN  
 Buffer B 0.05%TFA +90%CH<sub>3</sub>CN

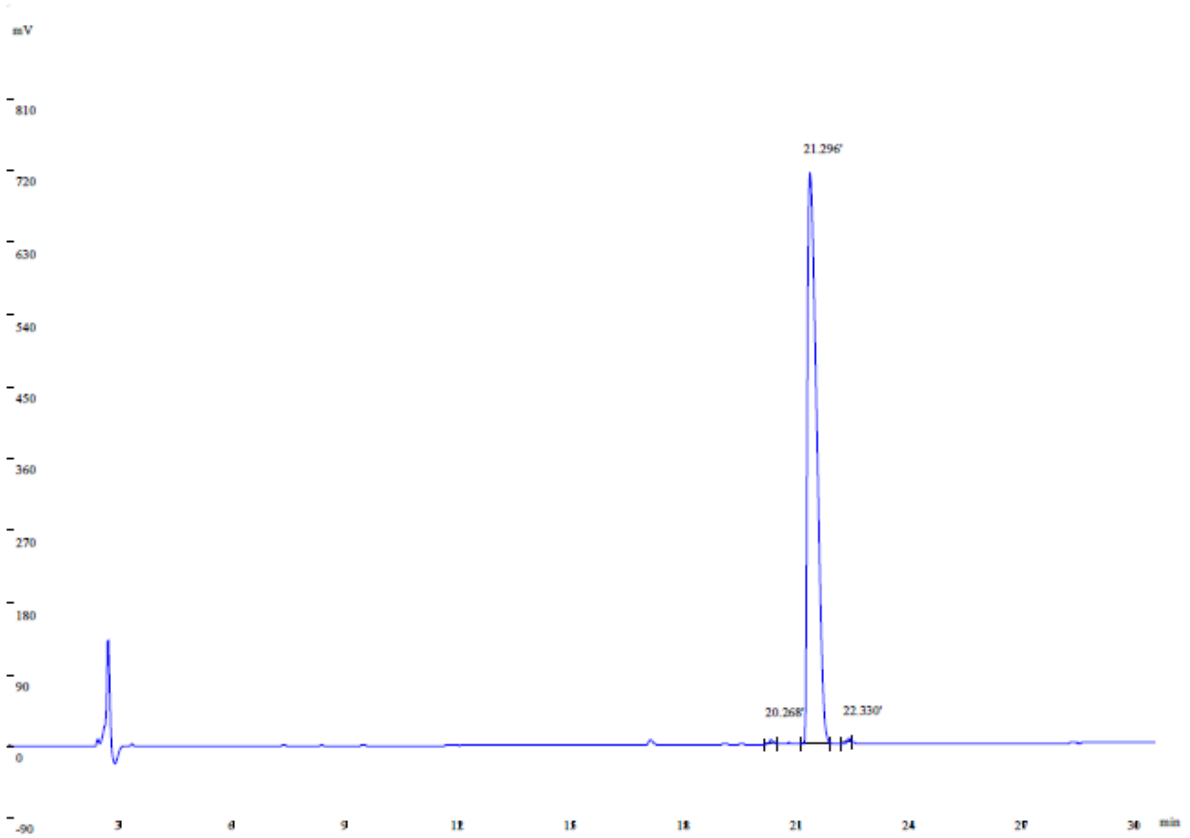

**Peak Results**

| Rank         | Time   | Conc.      | Area            | Height        |
|--------------|--------|------------|-----------------|---------------|
| 1            | 20.268 | 0.3373     | 41225           | 5315          |
| 2            | 21.296 | 99.37      | 12145670        | 714712        |
| 3            | 22.330 | 0.2875     | 35142           | 5714          |
| <b>Total</b> |        | <b>100</b> | <b>12222037</b> | <b>725741</b> |

## Mass Spectrometry Certificate

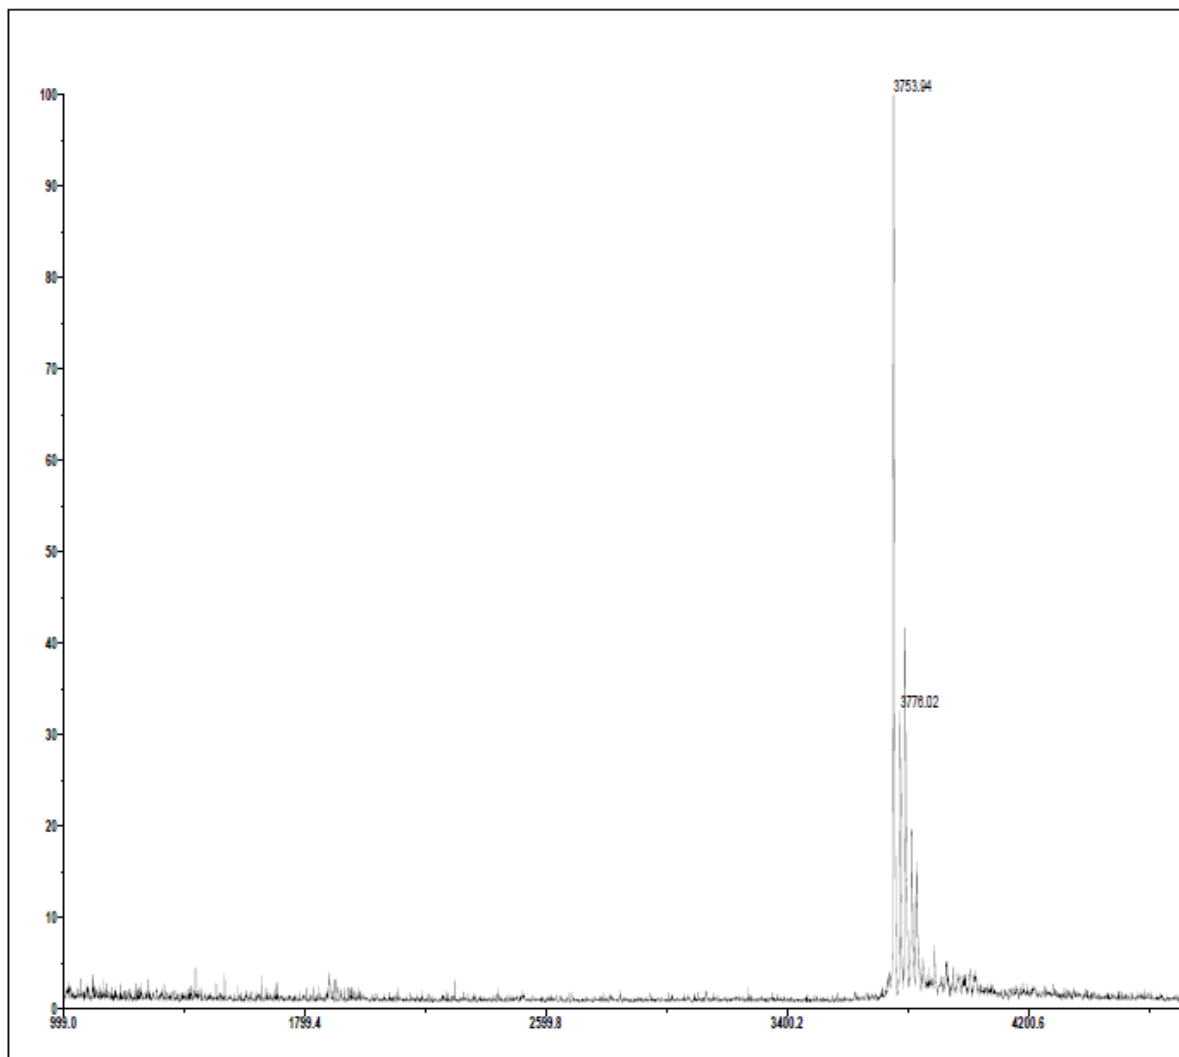

Lot No.: P170521-01-10

Method: MALDI-TOF

Main Peak: 3753.94

MW [M+H<sup>+</sup>]: 3753.94

MW: 3752.94

Theoretical MW: 3753.66

Match: Approved

Z=1



Peptide LP36 = **K****K****K****K**L**K****K**I**L****K****K**L**F****S****F**I**S**S**L**D**S**S**L**S**D**I**K**S**S****K**-NH<sub>2</sub>

**HPLC Certificate**

HPLC Column (250×4.6mm I.D.) C18  
Detection wavelength 220 nm  
Gradient 20-50%B in 30 min  
Buffer A 0.05%TFA +2%CH<sub>3</sub>CN  
Buffer B 0.05%TFA +90%CH<sub>3</sub>CN

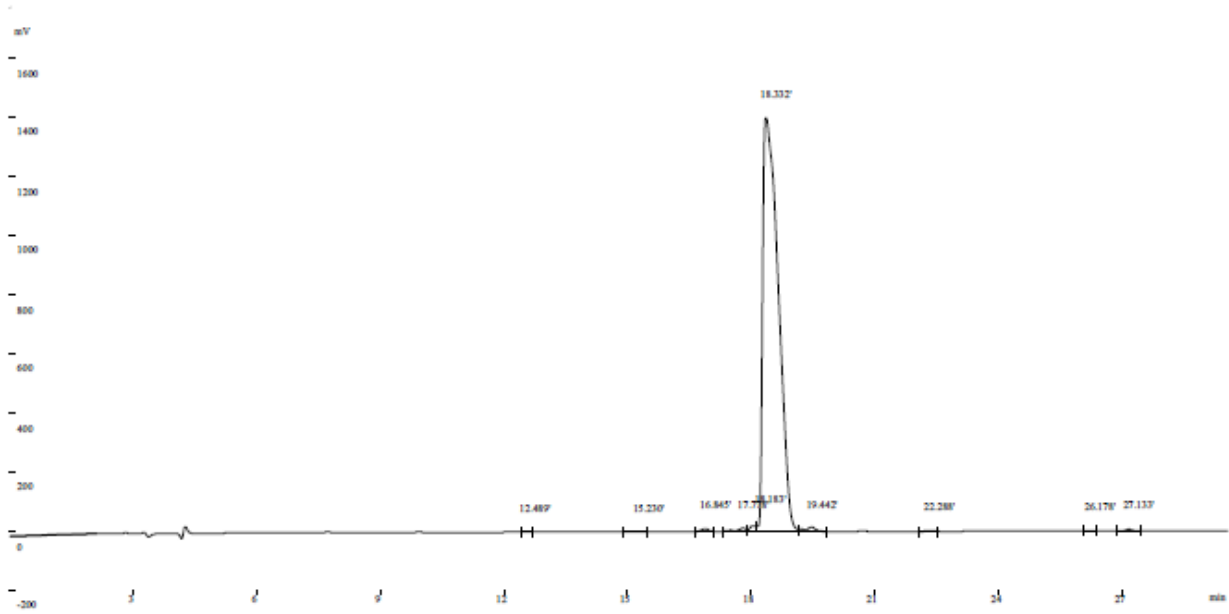

**Peak Results**

| Rank  | Time   | Quantity | Area     | Height  |
|-------|--------|----------|----------|---------|
| 1     | 12.489 | 0.02091  | 7372     | 967     |
| 2     | 15.230 | 0.08147  | 28719    | 1900    |
| 3     | 16.845 | 0.2572   | 90663    | 8688    |
| 4     | 17.778 | 0.4167   | 146880   | 10146   |
| 5     | 18.183 | 0.5708   | 201204   | 27388   |
| 6     | 18.332 | 97.83    | 34486470 | 1398540 |
| 7     | 19.442 | 0.5819   | 205146   | 13246   |
| 8     | 22.288 | 0.04685  | 16516    | 1385    |
| 9     | 26.178 | 0.03691  | 13012    | 1600    |
| 10    | 27.133 | 0.1577   | 55609    | 5305    |
| Total |        | 100      | 35251591 | 1469165 |

## Mass Spectrometry Certificate

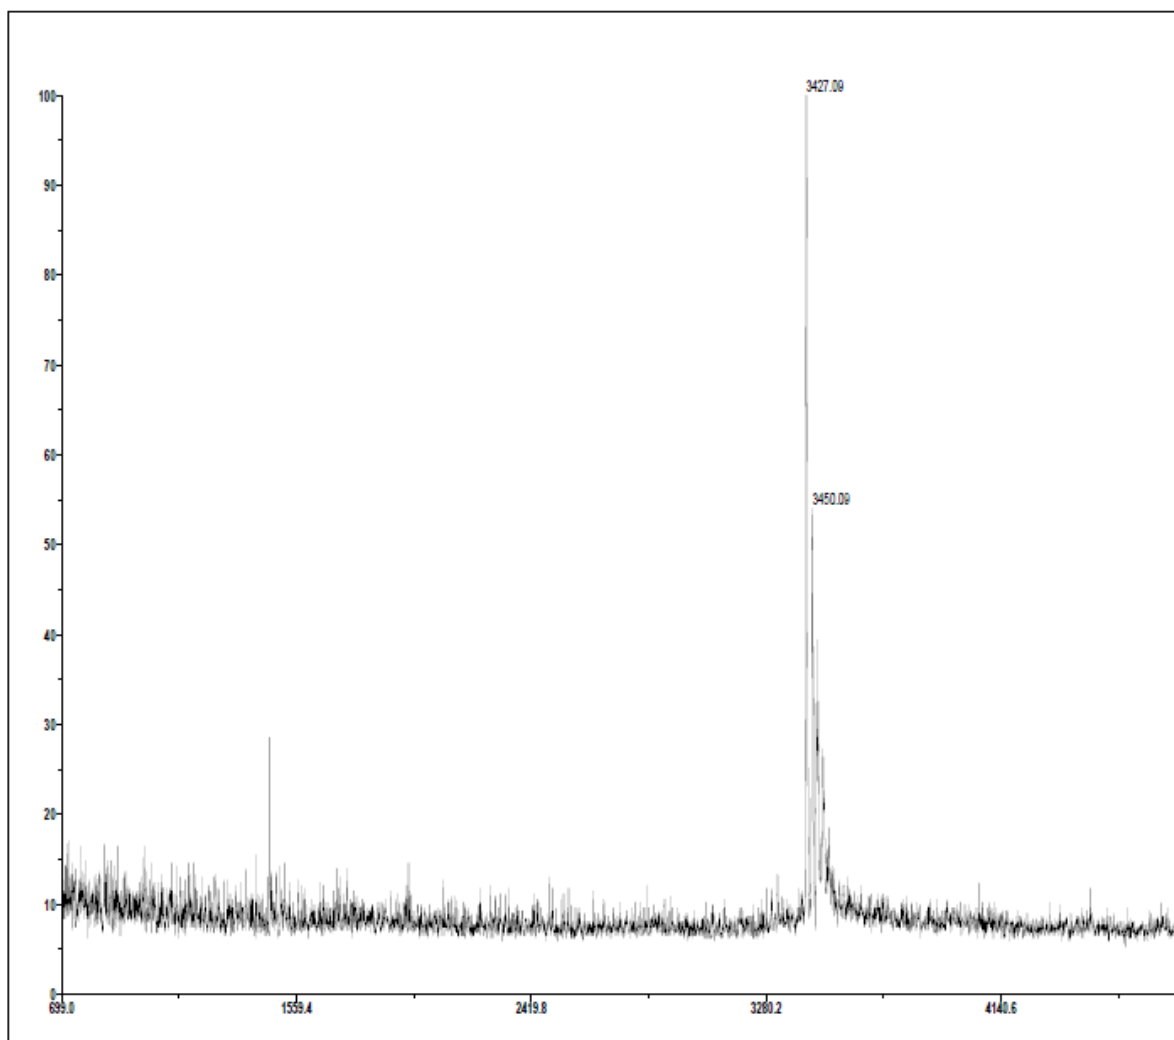

Lot No.: P170521-01-09  
Method: MALDI-TOF  
Main Peak: 3427.09  
MW [M+H<sup>+</sup>]: 3427.09  
MW: 3426.09  
Theoretical MW: 3425.23  
Match: Approved  
Z=1

Peptide LP37 = **K****K****K****K**L**K****K**I**L****K****K**L**F****N****F**I**N**N**L****D**N**N**L**N****D**I**K****N****N****K**-NH<sub>2</sub>

**HPLC Certificate**

HPLC Column (250×4.6mm I.D.) C18  
 Detection wavelength 220 nm  
 Gradient 20-50%B in 30 min  
 Buffer A 0.05%TFA +2%CH<sub>3</sub>CN  
 Buffer B 0.05%TFA +90%CH<sub>3</sub>CN

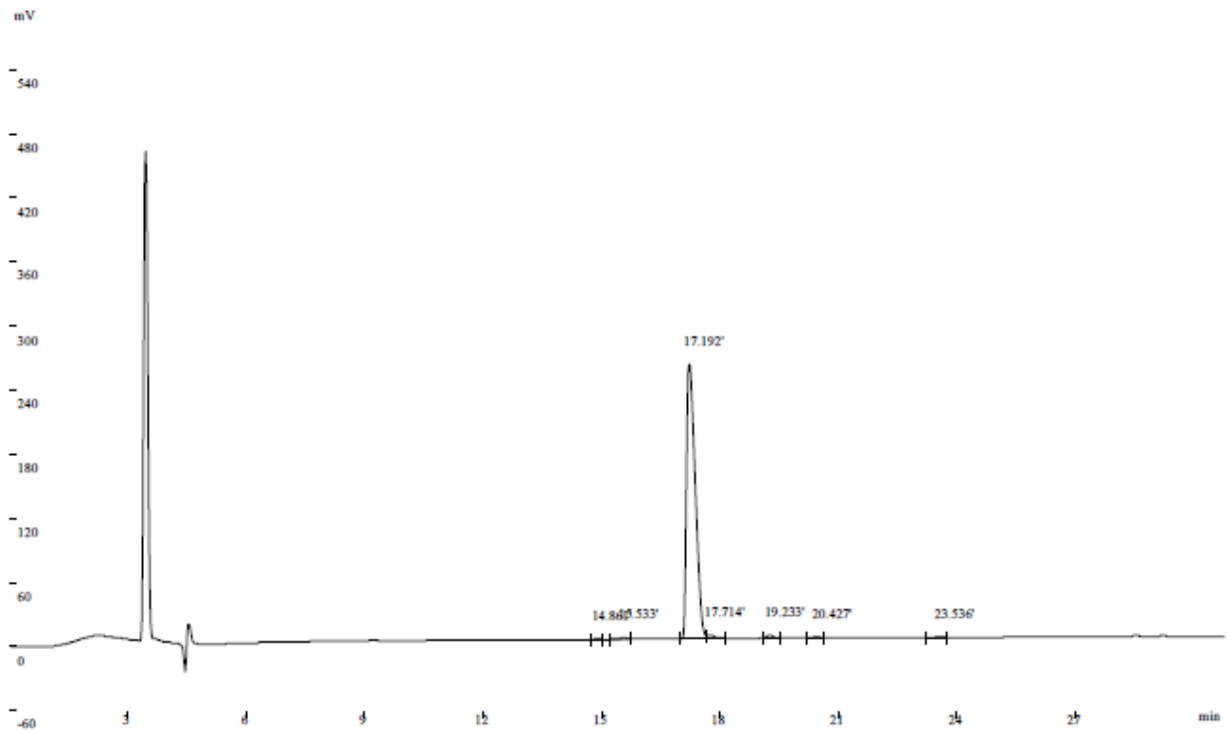

**Peak Results**

| Rank         | Time   | Quantity   | Area           | Height        |
|--------------|--------|------------|----------------|---------------|
| 1            | 14.861 | 0.1074     | 3964           | 537           |
| 2            | 15.533 | 0.4005     | 14779          | 1073          |
| 3            | 17.192 | 97.39      | 3594154        | 256822        |
| 4            | 17.714 | 0.9335     | 34447          | 2951          |
| 5            | 19.233 | 0.6383     | 23556          | 2258          |
| 6            | 20.427 | 0.2717     | 10027          | 1041          |
| 7            | 23.536 | 0.2546     | 9396           | 1042          |
| <b>Total</b> |        | <b>100</b> | <b>3690323</b> | <b>265724</b> |

## Mass Spectrometry Certificate

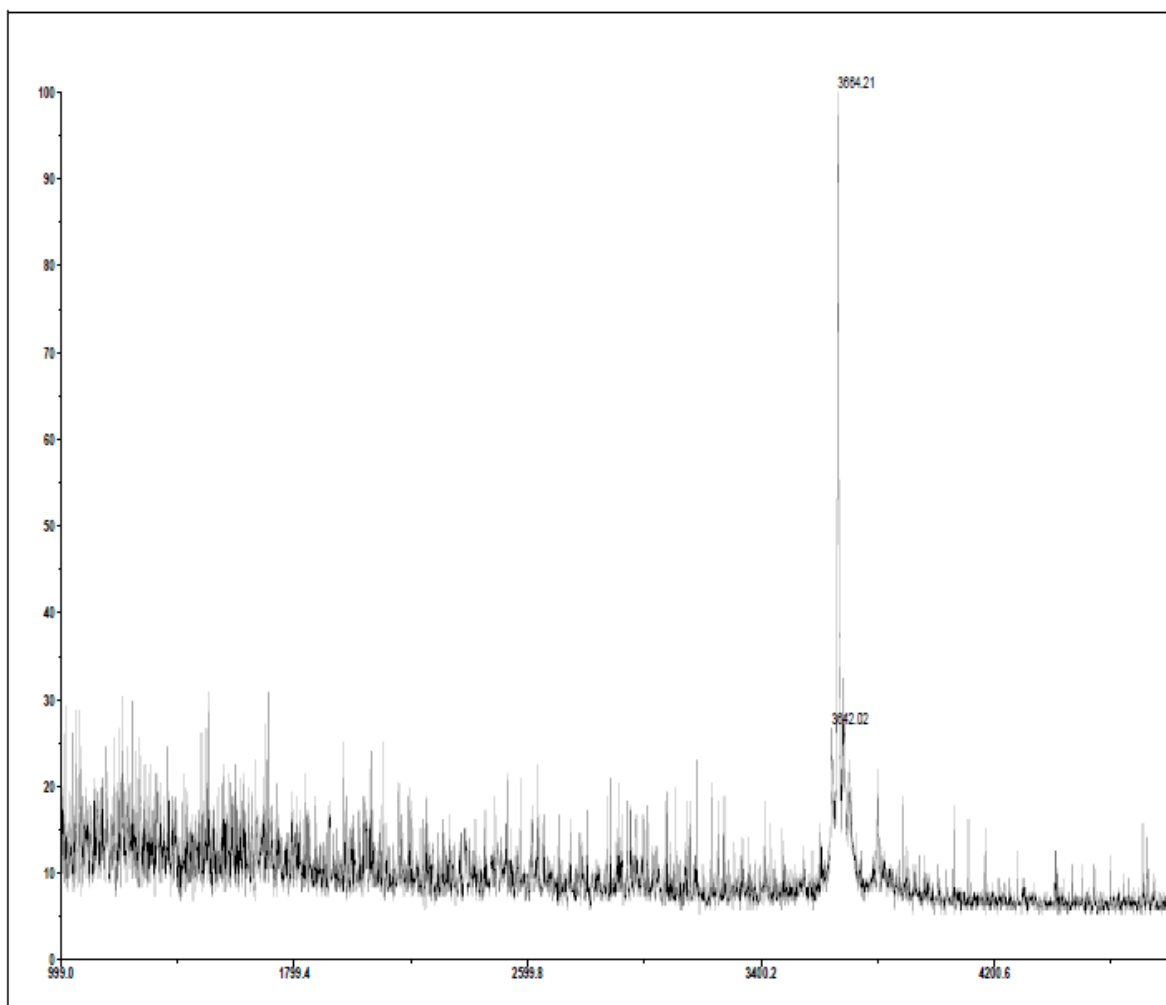

Lot No.: P170521-01-11  
Method: MALDI-TOF  
Main Peak: 3664.21  
MW [M+Na<sup>+</sup>]: 3664.21  
MW: 3641.21  
Theoretical MW: 3641.44  
Match: Approved  
Z=1

Peptide LP38 = **K****K****K****K**L**R****R**I**L****R****R**L**F****Q****F**I**N****Q****L****D****N****Q****L****Q****D**I**K****Q****N****K**-NH<sub>2</sub>

**HPLC Certificate**

**HPLC Column** (250×4.6mm I.D.) C18  
**Detection wavelength** 220 nm  
**Gradient** 30-60%B in 30 min  
**Buffer A** 0.05%TFA +2%CH<sub>3</sub>CN  
**Buffer B** 0.05%TFA +90%CH<sub>3</sub>CN

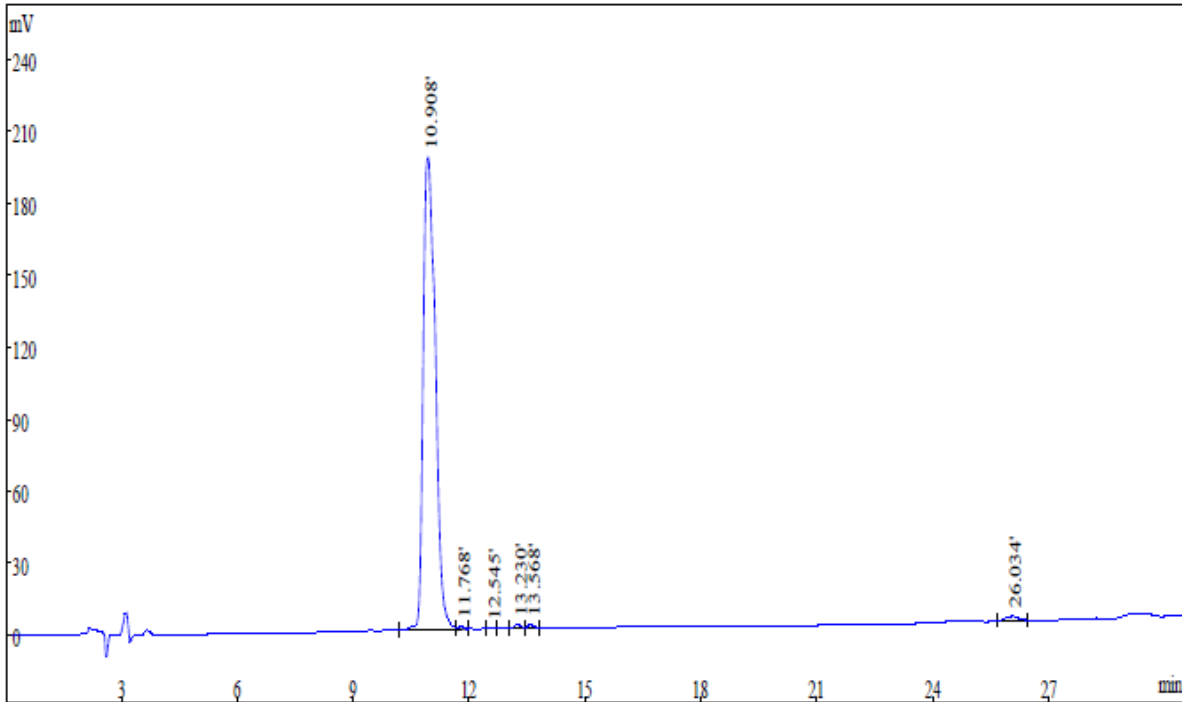

**Peak Results**

| Rank  | Time   | Conc.   | Area    | Height |
|-------|--------|---------|---------|--------|
| 1     | 10.908 | 97.92   | 3970979 | 196425 |
| 2     | 11.768 | 0.1393  | 5649    | 728    |
| 3     | 12.545 | 0.05034 | 2042    | 334    |
| 4     | 13.230 | 0.4941  | 20036   | 2249   |
| 5     | 13.568 | 0.5128  | 20795   | 2241   |
| 6     | 26.034 | 0.8817  | 35753   | 1602   |
| Total |        | 100     | 4055254 | 203579 |

## Mass Spectrometry Certificate

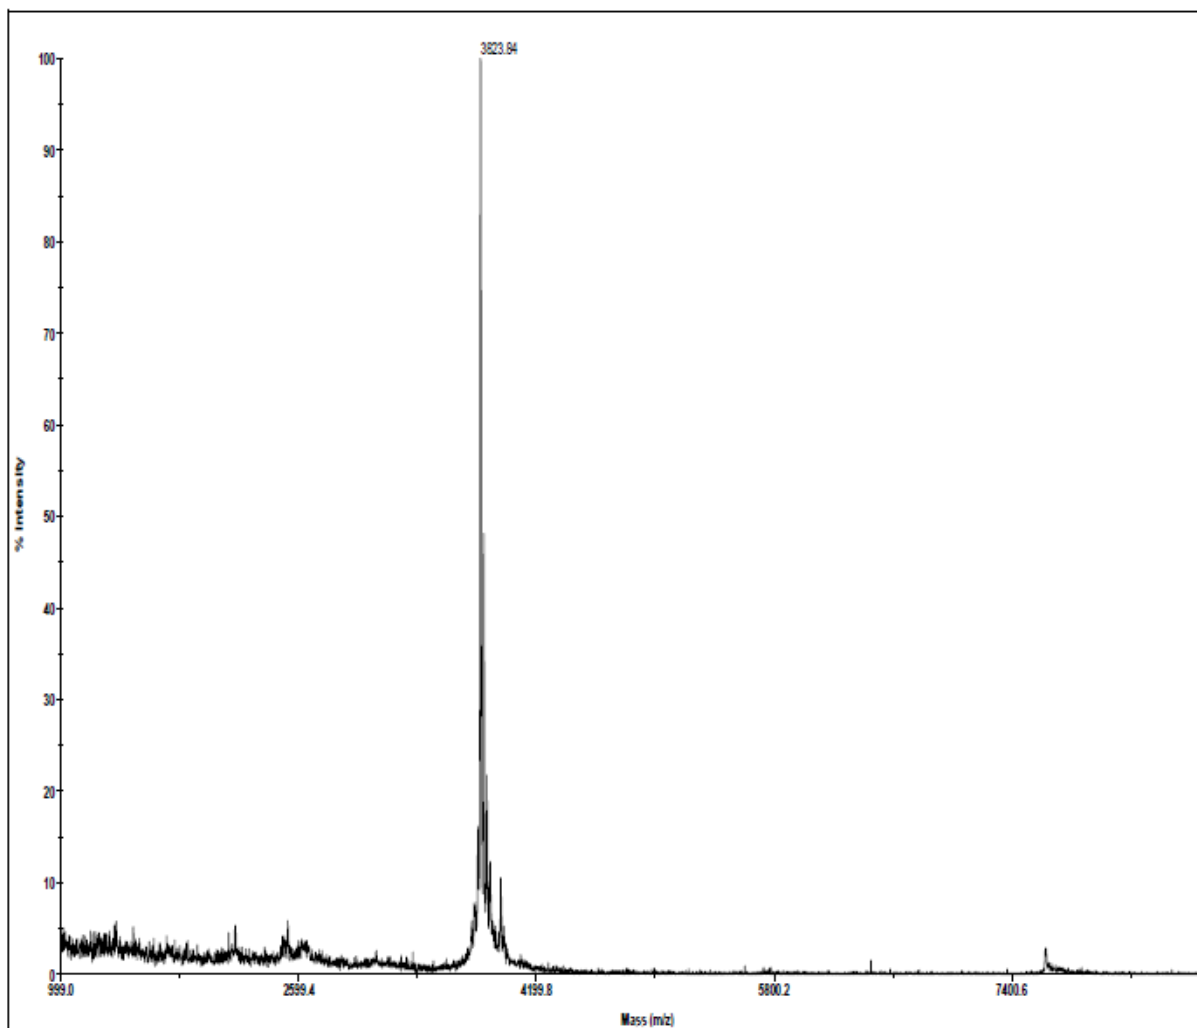

Lot No.: P300720-01-06  
Method: MALDI-TOF  
Main Peak: 3823.84  
MW [M+H<sup>+</sup>]: 3823.84  
MW: 3822.84  
Theoretical MW: 3823.63  
Match: Approved  
Z=1

Peptide LP39 = RRRRLKKILKKLFQ<sup>F</sup>INQLDNQLQ<sup>D</sup>IRQNR-NH<sub>2</sub>

**HPLC Certificate**

**HPLC Column** (250×4.6mm I.D.) C18  
**Detection wavelength** 220 nm  
**Gradient** 22-52%B in 30 min  
**Buffer A** 0.05%TFA +2%CH<sub>3</sub>CN  
**Buffer B** 0.05%TFA +90%CH<sub>3</sub>CN

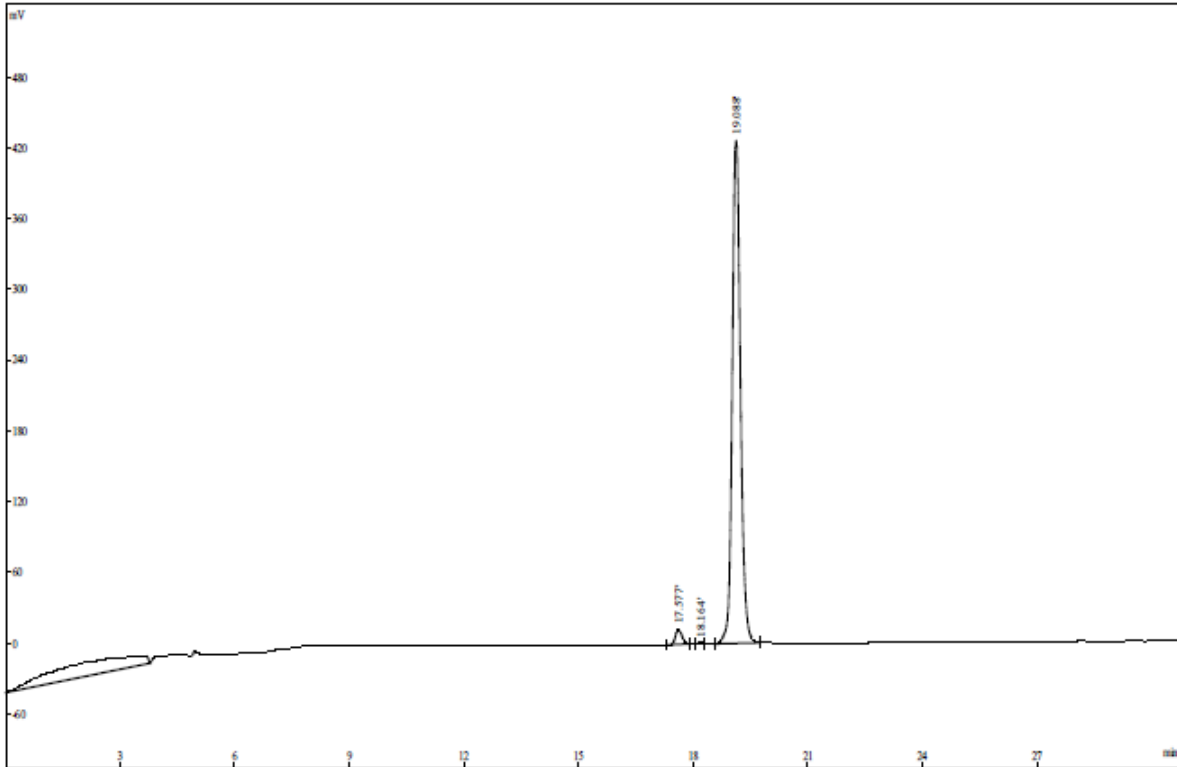

**Peak Results**

| Rank  | Time   | Quantity | Area    | Height |
|-------|--------|----------|---------|--------|
| 1     | 17.577 | 2.222    | 130904  | 12313  |
| 2     | 18.164 | 0.1141   | 6721    | 757    |
| 3     | 19.088 | 97.66    | 5752715 | 425024 |
| Total |        | 100      | 5890340 | 438094 |

## Mass Spectrometry Certificate

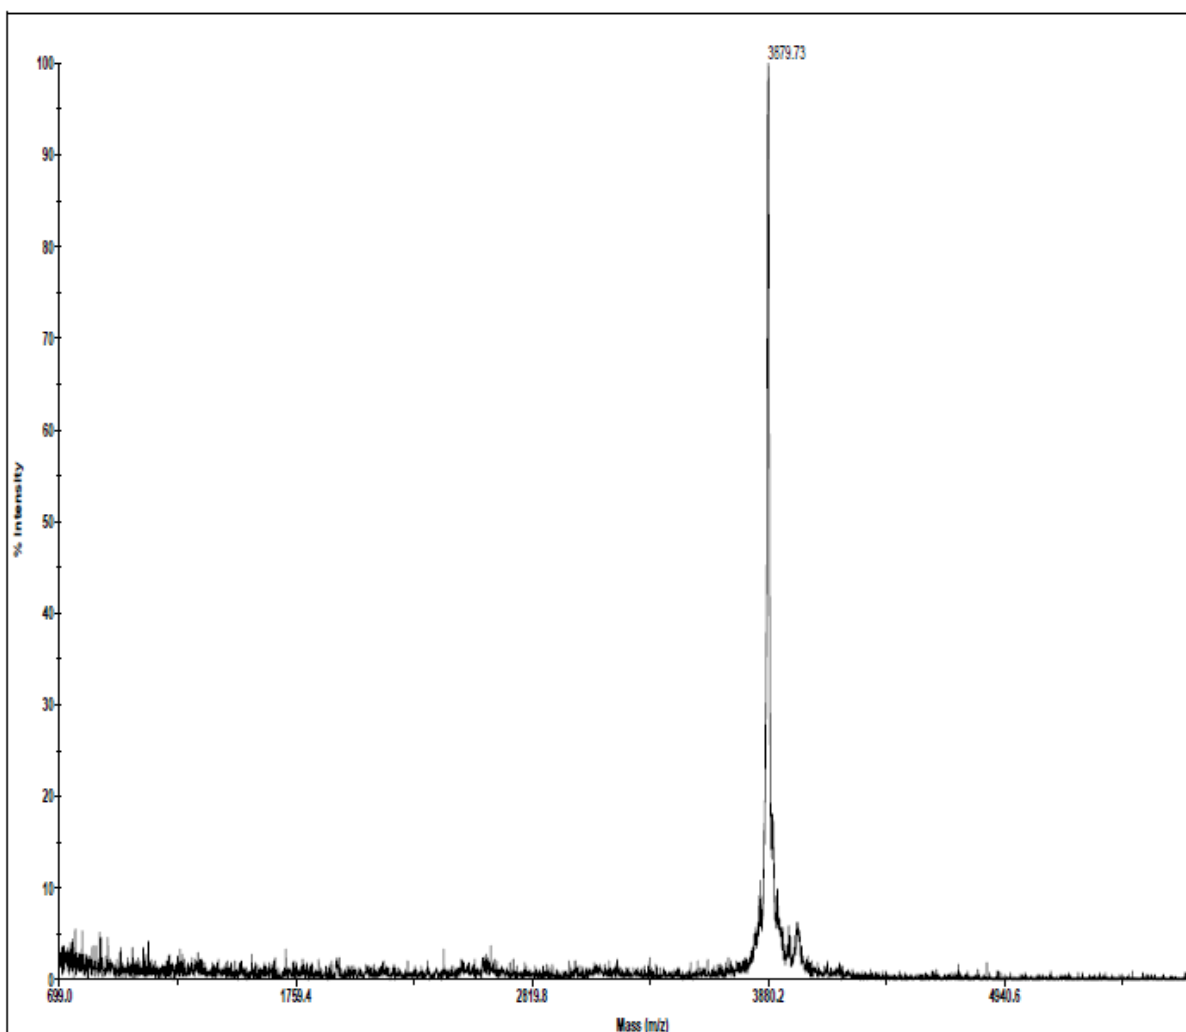

Lot No.: P300720-01-07  
Method: MALDI-TOF  
Main Peak: 3879.73  
MW [M+H<sup>+</sup>]: 3879.73  
MW: 3878.73  
Theoretical MW: 3879.66  
Match: Approved  
Z=1



Peptide LP40 = HHHHLKKILKKLFQFINQLDNQLQDIHHHH

**HPLC Certificate**

HPLC Column (250×4.6mm I.D.) C18  
Detection wavelength 220 nm  
Gradient 30-60%B in 30 min  
Buffer A 0.05%TFA +2%CH<sub>3</sub>CN  
Buffer B 0.05%TFA +90%CH<sub>3</sub>CN

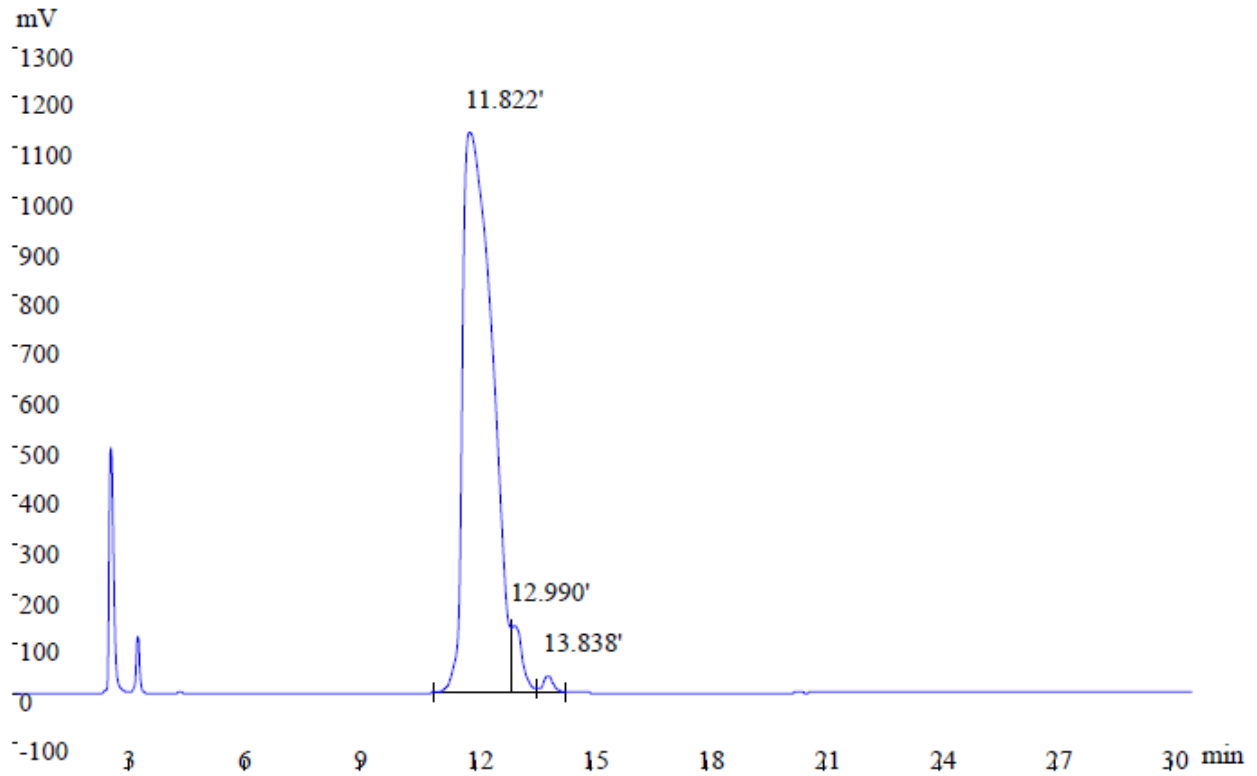

**Peak Results**

| Rank  | Time   | Conc.  | Area     | Height  |
|-------|--------|--------|----------|---------|
| 1     | 11.822 | 95.21  | 58034144 | 1126757 |
| 2     | 12.990 | 3.883  | 2366751  | 132323  |
| 3     | 13.838 | 0.9108 | 555207   | 33077   |
| Total |        | 100    | 60956102 | 1292157 |

## Mass Spectrometry Certificate

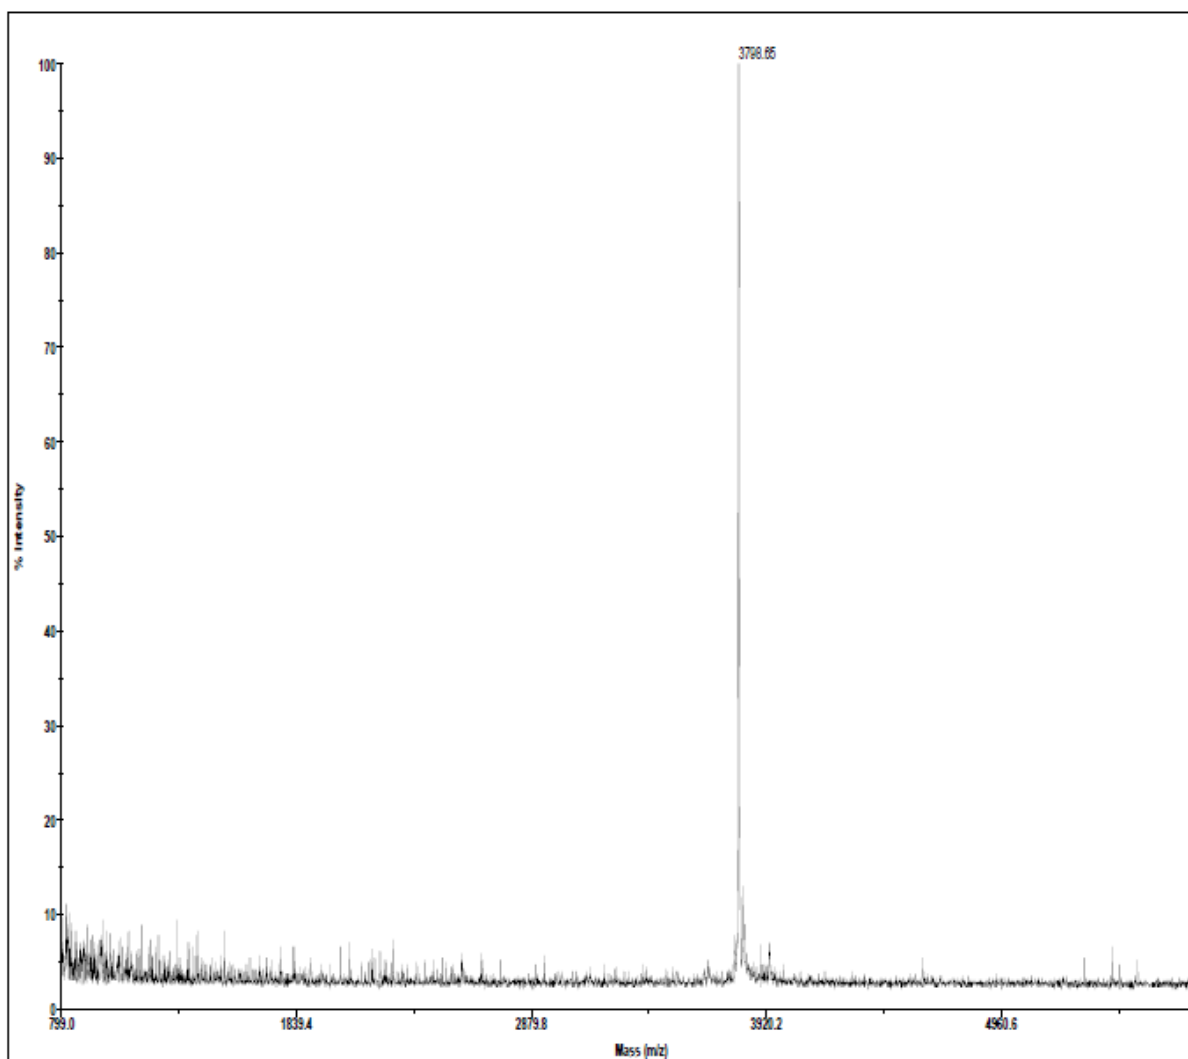

Lot No.: P071220-01-09

Method: MALDI-TOF

Main Peak: 3798.65

MW [M+H<sup>+</sup>]: 3798.65

MW: 3797.65

Theoretical MW: 3798.41

Match: Approved

Z=1

Peptide LP43 = **K**NQNL**DD**ILNQL**FQ**FINQL**K**NQLQ**KIKKKK**-NH<sub>2</sub>

**HPLC Certificate**

HPLC Column (250×4.6mm I.D.) C18  
Detection wavelength 220 nm  
Gradient 8-38%B in 30 min  
Buffer A 0.05%TFA +2%CH<sub>3</sub>CN  
Buffer B 0.05%TFA +90%CH<sub>3</sub>CN

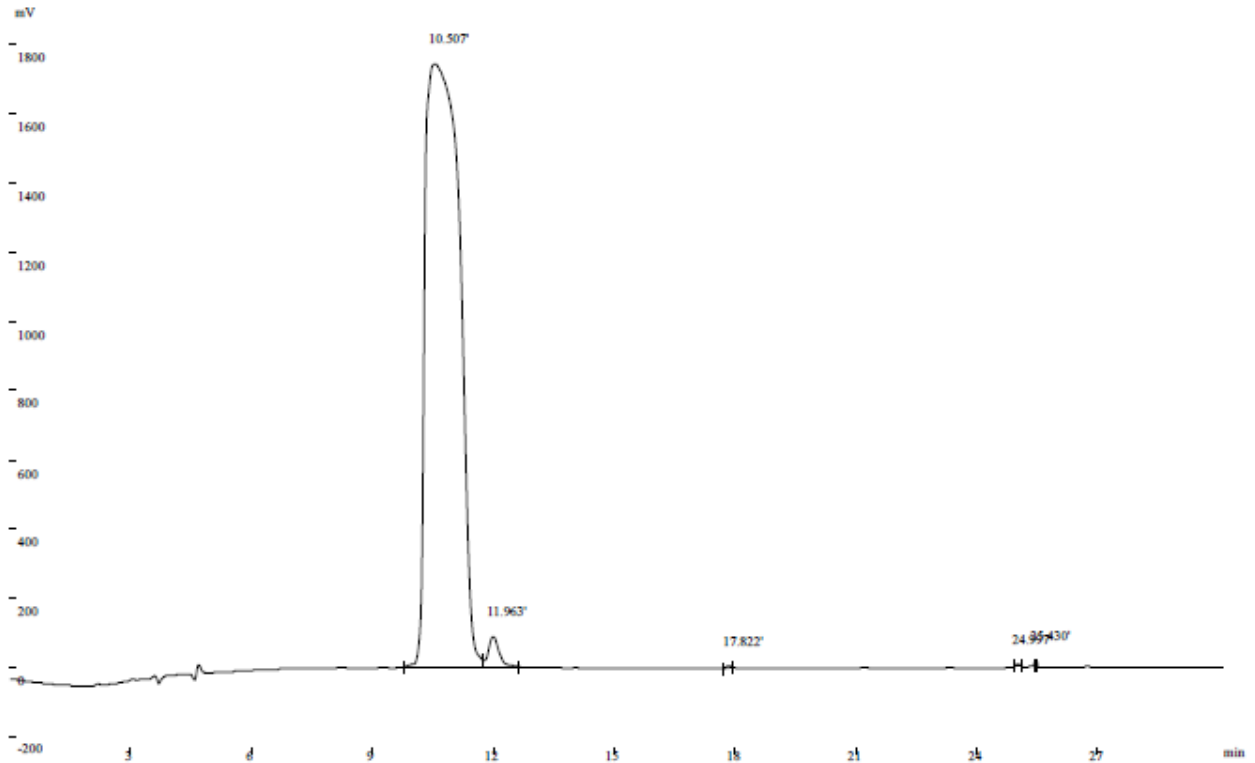

**Peak Results**

| Rank  | Time   | Quantity | Area      | Height  |
|-------|--------|----------|-----------|---------|
| 1     | 10.507 | 98.37    | 98711642  | 1741216 |
| 2     | 11.963 | 1.511    | 1516068   | 87484   |
| 3     | 17.822 | 0.03916  | 39295     | 5295    |
| 4     | 24.997 | 0.03865  | 38780     | 6517    |
| 5     | 25.430 | 0.03843  | 38565     | 14819   |
| Total |        | 100      | 100344350 | 1855331 |

## Mass Spectrometry Certificate

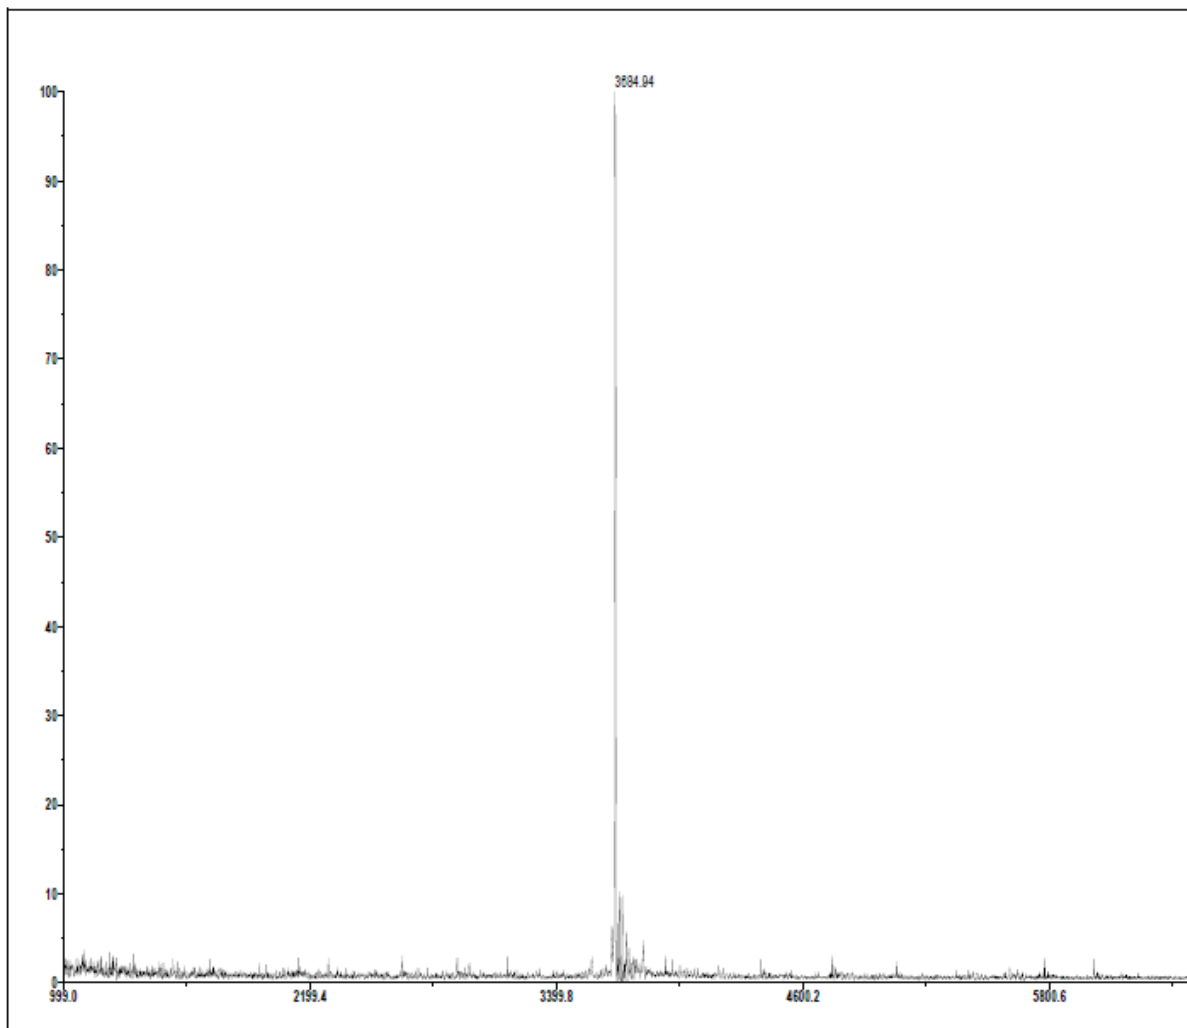

Lot No.: P061021-02-07

Method: MALDI-TOF

Main Peak: 3684.94

MW [M+H<sup>+</sup>]: 3684.94

MW: 3683.94

Theoretical MW: 3683.39

Match: Approved

Z=1

**Peptide Melittin** = GIGAVLKVLTTGLPALISWIKRKRQQ-NH<sub>2</sub>

**HPLC Certificate**

**HPLC Column** (250×4.6mm I.D.) C18  
**Detection wavelength** 220 nm  
**Gradient** 28-58%B in 30 min  
**Buffer A** 0.05%TFA +2%CH<sub>3</sub>CN  
**Buffer B** 0.05%TFA +90%CH<sub>3</sub>CN

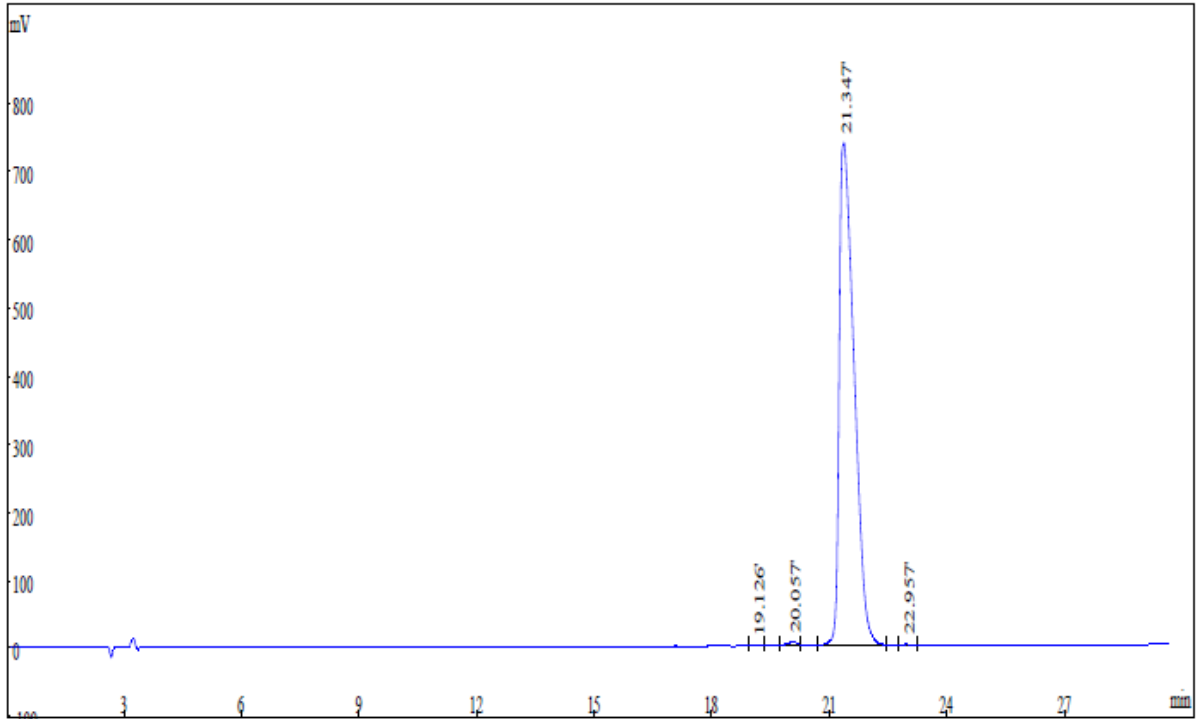

**Peak Results**

| Rank  | Time   | Conc.   | Area     | Height |
|-------|--------|---------|----------|--------|
| 1     | 19.126 | 0.09264 | 17118    | 1252   |
| 2     | 20.057 | 0.3664  | 67706    | 4298   |
| 3     | 21.347 | 99.46   | 18376733 | 735029 |
| 4     | 22.957 | 0.08532 | 15766    | 1323   |
| Total |        | 100     | 18477323 | 741902 |

## Mass Spectrometry Certificate

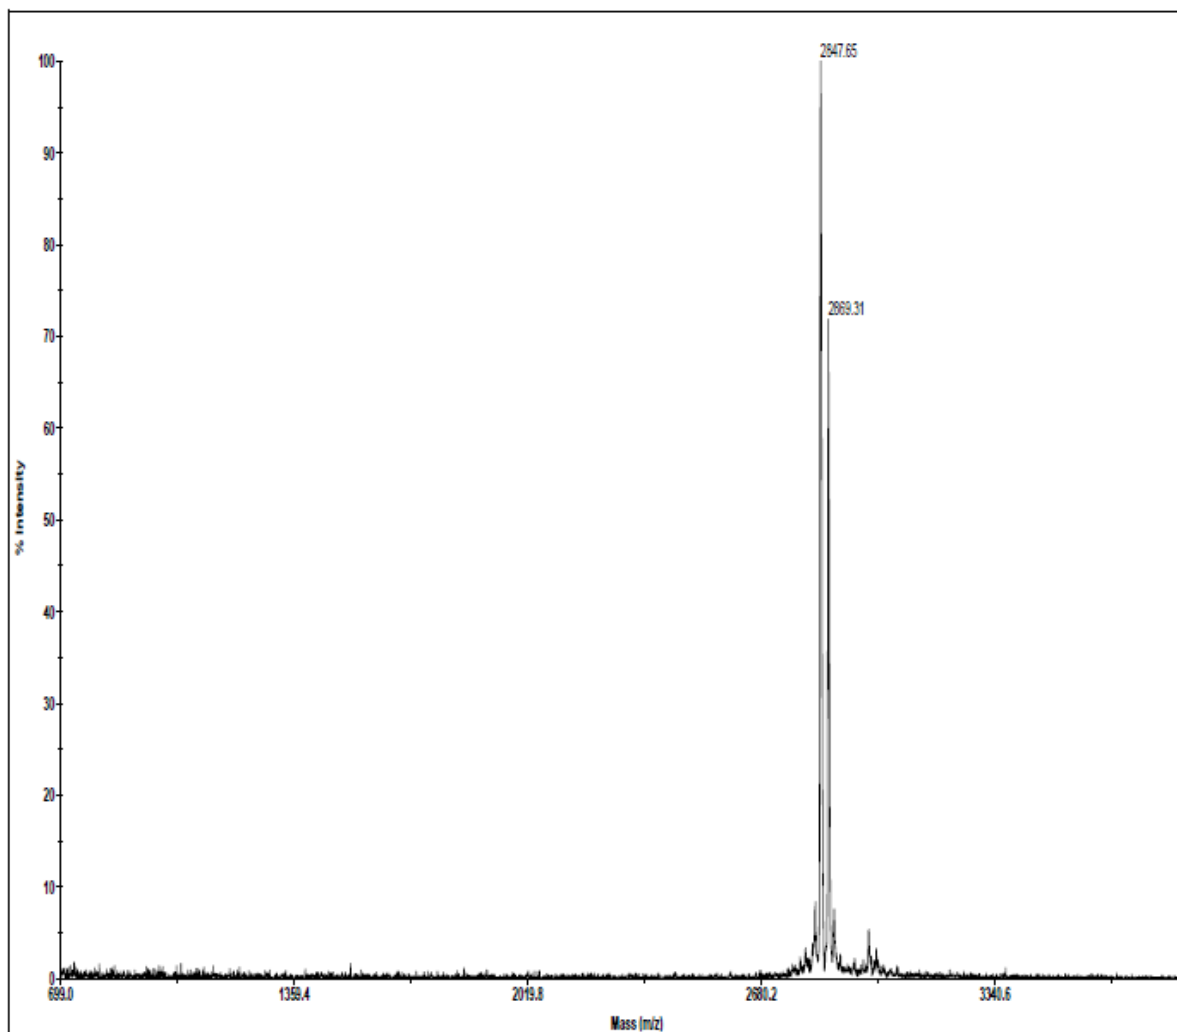

Lot No.: P300720-02-01

Method: MALDI-TOF

Main Peak: 2847.65

MW [M+H<sup>+</sup>]: 2847.65

MW: 2846.65

Theoretical MW: 2846.53

Match: Approved

Z=1
